# Supplementary material for: Identification of priority shorebird conservation areas in the Caribbean
Source: PeerJ. 2020 Sep 8;8:e9831. doi: 10.7717/peerj.9831 (PMC7485488; doi:10.7717/peerj.9831)
Supplement: Supplemental Information 1 [file peerj-08-9831-s001.xlsx]

## Sheet: High Count Data
COMMON NAME	SCIENTIFIC NAME	COUNT	DATE	SEASON	COUNTRY	STATE	LOCALITY ID	LATITUDE	LONGITUDE	SAMPLING EVENT IDENTIFIER	PROTOCOL TYPE
American Avocet	Recurvirostra americana	200	2017-10-11	Fall	Cuba	Sancti Spiritus	L6341744	21.6415	-79.5482	S39854820	Traveling
American Avocet	Recurvirostra americana	166	2012-11-24	Fall	Cuba	Pinar del Rio	L2745787	22.3292	-83.2741	S17679195	CWC Area Search
American Avocet	Recurvirostra americana	151	2019-10-10	Fall	Cuba	Villa Clara	L8212109	22.7317	-79.65	S60578443	Traveling
American Avocet	Recurvirostra americana	81	2018-11-30	Fall	Cuba	Villa Clara	L8212109	22.7317	-79.65	S50399743	Stationary
American Avocet	Recurvirostra americana	32	2019-09-26	Fall	Cuba	Pinar del Rio	L10283252	22.3467	-83.2094	S62269459	Traveling
American Avocet	Recurvirostra americana	15	2012-10-26	Fall	Cuba	Ciego de Avila	L1926130	22.5368	-78.3775	S12910719	Area
American Avocet	Recurvirostra americana	12	2019-11-23	Fall	Cuba	Sancti Spiritus	L10331595	21.7649	-80.0227	S61726511	Stationary
American Avocet	Recurvirostra americana	10	2013-11-24	Fall	Cuba	Pinar del Rio	L2745787	22.3292	-83.2741	S17682692	CWC Area Search
American Avocet	Recurvirostra americana	9	2016-11-18	Fall	Cuba	Matanzas	L3528694	22.1341	-81.2803	S32955244	Traveling
American Avocet	Recurvirostra americana	7	2017-11-05	Fall	Cuba	La Habana	L3445275	23.1459	-82.3932	S42405175	Traveling
American Avocet	Recurvirostra americana	500	2019-03-02	Spring	Cuba	Sancti Spiritus	L8753415	21.6444	-79.5479	S53367971	Traveling
American Avocet	Recurvirostra americana	400	2018-03-05	Spring	Cuba	Sancti Spiritus	L7042468	21.6756	-79.5296	S43514433	Stationary
American Avocet	Recurvirostra americana	175	2018-03-14	Spring	Cuba	Cienfuegos	L3673262	22.0637	-80.3949	S43754395	Traveling
American Avocet	Recurvirostra americana	127	2018-04-10	Spring	Cuba	Ciego de Avila	L7264420	22.4284	-78.3731	S44858294	Traveling
American Avocet	Recurvirostra americana	60	2012-04-01	Spring	Cuba	Ciego de Avila	L1487176	22.5515	-78.4216	S10400628	Stationary
American Avocet	Recurvirostra americana	50	2012-03-22	Spring	Cuba	Pinar del Rio	L2745787	22.3292	-83.2741	S17678591	CWC Area Search
American Avocet	Recurvirostra americana	48	2013-04-23	Spring	Cuba	Ciego de Avila	L3455848	22.4148	-78.417	S14494609	Traveling
American Avocet	Recurvirostra americana	31	2013-03-15	Spring	Cuba	Pinar del Rio	L2745787	22.3292	-83.2741	S17680462	CWC Area Search
American Avocet	Recurvirostra americana	18	2014-04-13	Spring	Cuba	Ciego de Avila	L2796629	22.4253	-78.387	S18028698	Stationary
American Avocet	Recurvirostra americana	16	2019-03-19	Spring	Cuba	Villa Clara	L3405414	22.6523	-79.0283	S54269966	Traveling
American Avocet	Recurvirostra americana	1200	2018-02-19	Winter	Cuba	Sancti Spiritus	L5385573	21.676	-79.5303	S43965539	Stationary
American Avocet	Recurvirostra americana	1000	2017-02-13	Winter	Cuba	Sancti Spiritus	L5492558	21.6747	-79.5361	S34608556	Traveling
American Avocet	Recurvirostra americana	855	2015-01-24	Winter	Cuba	Sancti Spiritus	L2746523	21.6754	-79.5396	S21696929	CWC Point Count
American Avocet	Recurvirostra americana	501	2019-01-02	Winter	Cuba	Villa Clara	L8212109	22.7317	-79.65	S51252581	Traveling
American Avocet	Recurvirostra americana	500	2019-02-28	Winter	Cuba	Sancti Spiritus	L5385573	21.676	-79.5303	S53250332	Stationary
American Avocet	Recurvirostra americana	349	2014-01-30	Winter	Cuba	Sancti Spiritus	L2746523	21.6754	-79.5396	S17683877	CWC Point Count
American Avocet	Recurvirostra americana	102	2018-02-02	Winter	Cuba	Cienfuegos	L7176899	22.0642	-80.3918	S44287467	Traveling
American Avocet	Recurvirostra americana	47	2015-12-16	Winter	Cuba	Matanzas	L5783732	23.0637	-80.7789	S40939533	CWC Point Count
American Avocet	Recurvirostra americana	45	2015-02-26	Winter	Cuba	Ciego de Avila	L1439451	22.4602	-78.3716	S22350750	Traveling
American Avocet	Recurvirostra americana	32	2013-01-22	Winter	Cuba	Pinar del Rio	L2745787	22.3292	-83.2741	S17679526	CWC Area Search
American Golden-Plover	Pluvialis dominica	150	2018-09-24	Fall	Barbados	Saint Philip	L3633238	13.127	-59.4638	S48713626	Stationary
American Golden-Plover	Pluvialis dominica	126	2014-10-08	Fall	Trinidad and Tobago	Tunapuna-Piarco	L621491	10.5989	-61.4007	S20070792	Traveling
American Golden-Plover	Pluvialis dominica	115	2017-09-10	Fall	Barbados	Saint James	L6260482	13.2146	-59.6106	S39114843	Stationary
American Golden-Plover	Pluvialis dominica	80	2015-09-24	Fall	Trinidad and Tobago	Tunapuna-Piarco	L621491	10.5989	-61.4007	S25156797	Traveling
American Golden-Plover	Pluvialis dominica	71	2017-09-21	Fall	Guadeloupe	Guadeloupe	L1467534	16.2714	-61.5235	S39315671	Stationary
American Golden-Plover	Pluvialis dominica	65	2019-09-18	Fall	Barbados	Christ Church	L1133560	13.0625	-59.5002	S59899979	Stationary
American Golden-Plover	Pluvialis dominica	60	2015-09-23	Fall	Barbados	Saint Philip	L3633238	13.127	-59.4638	S25163005	Stationary
American Golden-Plover	Pluvialis dominica	56	2017-09-28	Fall	Puerto Rico	Manati	L819377	18.4614	-66.5105	S42284998	Stationary
American Golden-Plover	Pluvialis dominica	50	2017-09-30	Fall	Trinidad and Tobago	Tunapuna-Piarco	L5046399	10.6247	-61.3803	S39475694	Traveling
American Golden-Plover	Pluvialis dominica	50	2017-10-05	Fall	Trinidad and Tobago	Couva-Tabaquite-Talparo	L6325540	10.4238	-61.4549	S39573682	Traveling
American Golden-Plover	Pluvialis dominica	6	2012-03-22	Spring	Cuba	Pinar del Rio	L2745787	22.3292	-83.2741	S17678591	CWC Area Search
American Golden-Plover	Pluvialis dominica	5	2016-03-15	Spring	Cuba	Ciego de Avila	L4670042	22.5752	-78.6476	S30066010	Traveling
American Golden-Plover	Pluvialis dominica	4	2013-05-11	Spring	Haiti	Sud	L817762	18.2534	-73.4776	S14075833	Traveling
American Golden-Plover	Pluvialis dominica	4	2018-04-15	Spring	Puerto Rico	Toa Baja	L4869899	18.4466	-66.2406	S44587652	Traveling
American Golden-Plover	Pluvialis dominica	2	2018-04-29	Spring	Cuba	La Habana	L7943338	23.0926	-82.4606	S45086080	International Shorebird Survey (ISS)
American Golden-Plover	Pluvialis dominica	2	2016-03-19	Spring	Cuba	Ciego de Avila	L8491434	22.4814	-78.1675	S52023551	Stationary
American Golden-Plover	Pluvialis dominica	2	2010-03-05	Spring	Puerto Rico	Barceloneta	L799571	18.4705	-66.5715	S6089044	Traveling
American Golden-Plover	Pluvialis dominica	7	2012-01-19	Winter	Cuba	Matanzas	L2616173	22.1764	-81.2384	S17608356	CWC Area Search
American Golden-Plover	Pluvialis dominica	7	2013-02-07	Winter	Puerto Rico	Arecibo	L1922417	18.4804	-66.5961	S12888732	Stationary
American Golden-Plover	Pluvialis dominica	6	2012-12-05	Winter	Puerto Rico	Barceloneta	L799571	18.4705	-66.5715	S12232615	Traveling
American Golden-Plover	Pluvialis dominica	5	2014-01-30	Winter	Cuba	Sancti Spiritus	L2746602	21.7146	-79.8332	S17685311	CWC Point Count
American Golden-Plover	Pluvialis dominica	4	2016-12-14	Winter	Aruba	Aruba	L5147973	12.6118	-70.0428	S33022754	Traveling
American Golden-Plover	Pluvialis dominica	4	2013-01-22	Winter	Cuba	Pinar del Rio	L2745787	22.3292	-83.2741	S17679526	CWC Area Search
American Golden-Plover	Pluvialis dominica	4	2019-12-27	Winter	Puerto Rico	Camuy	L4564353	18.4888	-66.8462	S62666831	Traveling
American Golden-Plover	Pluvialis dominica	4	2016-02-26	Winter	Puerto Rico	Arecibo	L690814	18.4802	-66.7036	S27826196	Stationary
American Golden-Plover	Pluvialis dominica	3	2018-12-01	Winter	Aruba	Aruba	L7620179	12.6128	-70.0423	S50354115	Traveling
American Golden-Plover	Pluvialis dominica	3	2016-12-06	Winter	Aruba	Aruba	L856498	12.5615	-70.0483	S32895661	Traveling
American Golden-Plover	Pluvialis dominica	3	2016-12-21	Winter	Barbados	Saint Lucy	L1251486	13.3345	-59.6135	S33135782	Traveling
American Golden-Plover	Pluvialis dominica	3	2016-12-26	Winter	Barbados	Saint Philip	L3633238	13.127	-59.4638	S33204494	Stationary
American Golden-Plover	Pluvialis dominica	3	2014-01-21	Winter	Cuba	La Habana	L2604192	23.1552	-82.3494	S16829147	CWC Point Count
American Golden-Plover	Pluvialis dominica	3	2014-01-30	Winter	Cuba	Pinar del Rio	L2745787	22.3292	-83.2741	S17683301	CWC Area Search
American Golden-Plover	Pluvialis dominica	3	2014-02-23	Winter	Haiti	Sud	L2674042	18.1822	-73.7572	S27019678	Traveling
American Oystercatcher	Haematopus palliatus	17	2016-10-31	Fall	Bahamas	Berry Islands	L5054916	25.6962	-77.8156	S32344308	Stationary
American Oystercatcher	Haematopus palliatus	11	2019-08-09	Fall	Guadeloupe	Guadeloupe	L2357199	16.1777	-61.1075	S58866718	Traveling
American Oystercatcher	Haematopus palliatus	11	2011-09-18	Fall	Guadeloupe	Guadeloupe	L891662	16.1748	-61.1101	S9265117	CWC Area Search
American Oystercatcher	Haematopus palliatus	10	2015-08-11	Fall	Bahamas	South Abaco and Moore's Island	L501571	26.0251	-77.3985	S24587104	Traveling
American Oystercatcher	Haematopus palliatus	10	2016-09-18	Fall	Guadeloupe	Guadeloupe	L2357199	16.1777	-61.1075	S31677726	CWC Area Search
American Oystercatcher	Haematopus palliatus	10	2013-08-16	Fall	Guadeloupe	Guadeloupe	L891659	16.1748	-61.1101	S14958423	Area
American Oystercatcher	Haematopus palliatus	8	2018-09-16	Fall	Guadeloupe	Guadeloupe	L2357199	16.1777	-61.1075	S48565216	Traveling
American Oystercatcher	Haematopus palliatus	8	2010-10-21	Fall	Guadeloupe	Guadeloupe	L891659	16.1748	-61.1101	S7590891	CWC Area Search
American Oystercatcher	Haematopus palliatus	7	2016-10-26	Fall	Bahamas	South Abaco and Moore's Island	L501571	26.0251	-77.3985	S32387349	Traveling
American Oystercatcher	Haematopus palliatus	7	2019-11-18	Fall	Curacao	Curacao	L5264710	12.1267	-68.8097	S61580782	Traveling
American Oystercatcher	Haematopus palliatus	7	2015-08-18	Fall	Guadeloupe	Guadeloupe	L2357199	16.1777	-61.1075	S24710920	CWC Area Search
American Oystercatcher	Haematopus palliatus	7	2017-09-12	Fall	Guadeloupe	Guadeloupe	L2357199	16.1777	-61.1075	S39260170	Stationary
American Oystercatcher	Haematopus palliatus	7	2018-10-20	Fall	Guadeloupe	Guadeloupe	L2357199	16.1777	-61.1075	S49312514	Traveling
American Oystercatcher	Haematopus palliatus	7	2012-09-12	Fall	Guadeloupe	Guadeloupe	L891659	16.1748	-61.1101	S13400073	CWC Area Search
American Oystercatcher	Haematopus palliatus	7	2015-08-27	Fall	Puerto Rico	Ponce	L3875012	17.969	-66.6039	S24796086	Stationary
American Oystercatcher	Haematopus palliatus	7	2014-09-07	Fall	Puerto Rico	Barceloneta	L682838	18.4809	-66.5343	S22341253	Stationary
American Oystercatcher	Haematopus palliatus	7	2011-10-08	Fall	Virgin Islands (British)	Virgin Islands (British)	L1287490	18.476	-64.5772	S8917093	Traveling
American Oystercatcher	Haematopus palliatus	7	2011-10-08	Fall	Virgin Islands (British)	Virgin Islands (British)	L1315653	18.4478	-64.5329	S9130815	Traveling
American Oystercatcher	Haematopus palliatus	13	2012-04-30	Spring	Virgin Islands (British)	Virgin Islands (British)	L1313728	18.4528	-64.7288	S10619319	CWC Point Count
American Oystercatcher	Haematopus palliatus	10	2016-05-16	Spring	Bahamas	Inagua	L4641480	20.9328	-73.4672	S29916735	Incidental
American Oystercatcher	Haematopus palliatus	10	2012-05-14	Spring	Guadeloupe	Guadeloupe	L891659	16.1748	-61.1101	S13399970	CWC Area Search
American Oystercatcher	Haematopus palliatus	9	2014-03-19	Spring	Guadeloupe	Guadeloupe	L2357199	16.1777	-61.1075	S17626140	CWC Area Search
American Oystercatcher	Haematopus palliatus	9	2011-05-17	Spring	Guadeloupe	Guadeloupe	L891659	16.1748	-61.1101	S8440693	CWC Area Search
American Oystercatcher	Haematopus palliatus	8	2016-03-29	Spring	Bahamas	South Andros and Mangrove Cay	L4437707	24.2987	-77.6734	S28633631	Traveling
American Oystercatcher	Haematopus palliatus	8	2019-03-05	Spring	Bahamas	South Abaco and Moore's Island	L501571	26.0251	-77.3985	S53484777	Traveling
American Oystercatcher	Haematopus palliatus	8	2017-04-25	Spring	Guadeloupe	Guadeloupe	L2357199	16.1777	-61.1075	S36375338	Stationary
American Oystercatcher	Haematopus palliatus	8	2010-05-18	Spring	Guadeloupe	Guadeloupe	L891659	16.1748	-61.1101	S7584366	CWC Area Search
American Oystercatcher	Haematopus palliatus	7	2016-04-17	Spring	Guadeloupe	Guadeloupe	L2357199	16.1777	-61.1075	S29040689	CWC Area Search
American Oystercatcher	Haematopus palliatus	7	2018-05-15	Spring	Guadeloupe	Guadeloupe	L2357199	16.1777	-61.1075	S45872404	Traveling
American Oystercatcher	Haematopus palliatus	7	2018-03-04	Spring	Puerto Rico	Aguadilla	L7888411	18.4226	-67.1557	S48257279	Incidental
American Oystercatcher	Haematopus palliatus	15	2015-02-04	Winter	Bahamas	Berry Islands	L3404656	25.7429	-77.8671	S22003269	Incidental
American Oystercatcher	Haematopus palliatus	14	2017-02-04	Winter	Bahamas	Berry Islands	L5519562	25.7391	-77.8658	S34831435	Stationary
American Oystercatcher	Haematopus palliatus	12	2016-12-17	Winter	Bahamas	South Abaco and Moore's Island	L501571	26.0251	-77.3985	S33157426	Traveling
American Oystercatcher	Haematopus palliatus	10	2015-02-17	Winter	Bahamas	South Abaco and Moore's Island	L501571	26.0251	-77.3985	S21982089	Traveling
American Oystercatcher	Haematopus palliatus	10	2010-02-17	Winter	Guadeloupe	Guadeloupe	L891659	16.1748	-61.1101	S7584358	CWC Area Search
American Oystercatcher	Haematopus palliatus	10	2011-12-13	Winter	Guadeloupe	Guadeloupe	L891659	16.1748	-61.1101	S9661629	CWC Area Search
American Oystercatcher	Haematopus palliatus	9	2019-02-15	Winter	Guadeloupe	Guadeloupe	L2357199	16.1777	-61.1075	S52746416	Traveling
American Oystercatcher	Haematopus palliatus	9	2016-01-30	Winter	Turks and Caicos Islands	Turks and Caicos Islands	L6372191	21.5726	-71.5004	S27217323	Traveling
American Oystercatcher	Haematopus palliatus	8	2017-12-17	Winter	Bahamas	South Abaco and Moore's Island	L501571	26.0251	-77.3985	S41167696	Traveling
American Oystercatcher	Haematopus palliatus	7	2011-02-15	Winter	Guadeloupe	Guadeloupe	L891659	16.1748	-61.1101	S7750219	CWC Area Search
American Oystercatcher	Haematopus palliatus	7	2013-01-13	Winter	Guadeloupe	Guadeloupe	L891659	16.1748	-61.1101	S13187763	CWC Area Search
American Oystercatcher	Haematopus palliatus	7	2016-01-27	Winter	Turks and Caicos Islands	Turks and Caicos Islands	L4197763	21.7847	-72.2277	S27171421	Traveling
American Oystercatcher	Haematopus palliatus	7	2017-01-06	Winter	Bahamas	Long Island	L5259960	23.1778	-75.251	S33678944	Traveling
American Oystercatcher	Haematopus palliatus	7	2017-01-12	Winter	Guadeloupe	Guadeloupe	L2357199	16.1777	-61.1075	S33616296	Stationary
Black-bellied Plover	Pluvialis squatarola	2800	2019-10-10	Fall	Cuba	Villa Clara	L8212109	22.7317	-79.65	S60578443	Traveling
Black-bellied Plover	Pluvialis squatarola	350	2012-10-10	Fall	Dominican Republic	Monte Cristi	L1761595	19.8079	-71.735	S12031400	CWC Area Search
Black-bellied Plover	Pluvialis squatarola	275	2019-09-13	Fall	Puerto Rico	Loíza	L3040527	18.4383	-65.8765	S59734259	Stationary
Black-bellied Plover	Pluvialis squatarola	230	2017-11-06	Fall	Puerto Rico	Río Grande	L5833124	18.4103	-65.8031	S41306373	Stationary
Black-bellied Plover	Pluvialis squatarola	229	2012-11-23	Fall	Puerto Rico	Loíza	L1372570	18.4364	-65.8764	S12140877	Stationary
Black-bellied Plover	Pluvialis squatarola	200	2013-11-01	Fall	Bahamas	Central Abaco, Hope Town and Green Turtle Cay	L3455054	26.7658	-77.3255	S15540682	Traveling
Black-bellied Plover	Pluvialis squatarola	200	2018-09-23	Fall	Puerto Rico	Río Grande	L5833124	18.4103	-65.8031	S48688710	Stationary
Black-bellied Plover	Pluvialis squatarola	125	2018-10-27	Fall	Dominican Republic	Monseñor Nouel	L8080457	19.0784	-70.4189	S49511294	Traveling
Black-bellied Plover	Pluvialis squatarola	122	2012-09-19	Fall	Bahamas	Freeport and West Grand Bahama	L791657	26.5119	-78.6489	S11627213	Traveling
Black-bellied Plover	Pluvialis squatarola	105	2012-11-04	Fall	Cayman Islands	George Town	L1280014	19.2829	-81.3453	S11961372	Traveling
Black-bellied Plover	Pluvialis squatarola	1205	2012-03-22	Spring	Cuba	Pinar del Rio	L2745787	22.3292	-83.2741	S17678591	CWC Area Search
Black-bellied Plover	Pluvialis squatarola	550	2012-03-13	Spring	Dominican Republic	Monte Cristi	L1761595	19.8079	-71.735	S11660860	CWC Area Search
Black-bellied Plover	Pluvialis squatarola	332	2018-03-31	Spring	Puerto Rico	Río Grande	L5833124	18.4103	-65.8031	S44114303	Stationary
Black-bellied Plover	Pluvialis squatarola	300	2013-03-11	Spring	Cuba	Matanzas	L3528694	22.1341	-81.2803	S13863346	Traveling
Black-bellied Plover	Pluvialis squatarola	215	2018-04-01	Spring	Bahamas	New Providence	L1100109	25.0714	-77.307	S44168453	Traveling
Black-bellied Plover	Pluvialis squatarola	193	2019-04-17	Spring	Cuba	Villa Clara	L8212109	22.7317	-79.65	S55294057	Traveling
Black-bellied Plover	Pluvialis squatarola	190	2018-03-08	Spring	Saint Kitts and Nevis	Saint Kitts	L7037596	17.3268	-62.7057	S43486656	Stationary
Black-bellied Plover	Pluvialis squatarola	130	2012-03-14	Spring	Dominican Republic	Monte Cristi	L1074002	19.6982	-71.7263	S11661002	CWC Area Search
Black-bellied Plover	Pluvialis squatarola	122	2019-03-31	Spring	Puerto Rico	Río Grande	L5833124	18.4103	-65.8031	S54402158	Stationary
Black-bellied Plover	Pluvialis squatarola	120	2017-03-23	Spring	Turks and Caicos Islands	Turks and Caicos Islands	L5040187	21.7685	-72.1929	S35381910	Historical
Black-bellied Plover	Pluvialis squatarola	431	2019-01-17	Winter	Bahamas	New Providence	L605049	24.9926	-77.3634	S51787735	Traveling
Black-bellied Plover	Pluvialis squatarola	427	2018-01-15	Winter	Puerto Rico	Río Grande	L5833124	18.4103	-65.8031	S41926451	Stationary
Black-bellied Plover	Pluvialis squatarola	385	2016-02-04	Winter	Bahamas	New Providence	L4291727	25.0079	-77.3384	S27701942	CWC Area Search
Black-bellied Plover	Pluvialis squatarola	350	2012-12-12	Winter	Puerto Rico	Loíza	L1765232	18.4383	-65.8786	S12275802	Stationary
Black-bellied Plover	Pluvialis squatarola	331	2018-12-16	Winter	Bahamas	New Providence	L605049	24.9926	-77.3634	S50708835	Traveling
Black-bellied Plover	Pluvialis squatarola	315	2014-01-27	Winter	Cuba	Matanzas	L2616173	22.1764	-81.2384	S16901804	CWC Area Search
Black-bellied Plover	Pluvialis squatarola	300	2017-01-21	Winter	Turks and Caicos Islands	Turks and Caicos Islands	L5282214	21.6461	-71.774	S33839296	Traveling
Black-bellied Plover	Pluvialis squatarola	258	2019-01-29	Winter	Dominican Republic	Monte Cristi	L2456128	19.7121	-71.6934	S53753346	CWC Area Search
Black-bellied Plover	Pluvialis squatarola	250	2018-02-20	Winter	Cuba	Matanzas	L3528694	22.1341	-81.2803	S43503809	Traveling
Black-bellied Plover	Pluvialis squatarola	250	2017-02-12	Winter	Cuba	Ciego de Avila	L5494020	22.4437	-78.2848	S34617459	Traveling
Black-necked Stilt	Himantopus mexicanus	5480	2013-11-20	Fall	Dominican Republic	Monte Cristi	multi, see next tab				CWC Area Search
Black-necked Stilt	Himantopus mexicanus	2000	2012-08-25	Fall	Puerto Rico	Cabo Rojo	L343336	17.9566	-67.1993	S11440103	Traveling
Black-necked Stilt	Himantopus mexicanus	1732	2015-10-02	Fall	Dominican Republic	Monte Cristi	multi, see next tab				Traveling
Black-necked Stilt	Himantopus mexicanus	1000	2014-11-29	Fall	Puerto Rico	Cabo Rojo	L1090093	17.9757	-67.2116	S21215786	Traveling
Black-necked Stilt	Himantopus mexicanus	1000	2018-08-05	Fall	Puerto Rico	Cabo Rojo	L343336	17.9566	-67.1993	S47733249	Traveling
Black-necked Stilt	Himantopus mexicanus	756	2013-10-18	Fall	Puerto Rico	Cabo Rojo	L293471	17.952	-67.1959	S15434721	Traveling
Black-necked Stilt	Himantopus mexicanus	740	2012-11-24	Fall	Cuba	Pinar del Rio	L2745787	22.3292	-83.2741	S17679195	CWC Area Search
Black-necked Stilt	Himantopus mexicanus	661	2012-11-08	Fall	Puerto Rico	Lajas	L1525747	17.9759	-67.0125	S11994226	Traveling
Black-necked Stilt	Himantopus mexicanus	629	2012-10-11	Fall	Dominican Republic	Monte Cristi	multi, see next tab				CWC Area Search
Black-necked Stilt	Himantopus mexicanus	600	2016-11-28	Fall	Puerto Rico	Cabo Rojo	L682443	17.9743	-67.2111	S32768025	Stationary
Black-necked Stilt	Himantopus mexicanus	818	2013-03-19	Spring	Dominican Republic	Monte Cristi	multi, see next tab				CWC Area Search
Black-necked Stilt	Himantopus mexicanus	575	2019-03-09	Spring	Cuba	Ciego de Avila	L8821585	22.4322	-78.3809	S54028582	Stationary
Black-necked Stilt	Himantopus mexicanus	473	2012-03-22	Spring	Cuba	Pinar del Rio	L2745787	22.3292	-83.2741	S17678591	CWC Area Search
Black-necked Stilt	Himantopus mexicanus	460	2018-03-04	Spring	Puerto Rico	Cabo Rojo	L3073998	17.975	-67.2123	S43375246	Traveling
Black-necked Stilt	Himantopus mexicanus	437	2012-03-13	Spring	Dominican Republic	Monte Cristi	multi, see next tab				CWC Area Search
Black-necked Stilt	Himantopus mexicanus	430	2013-03-18	Spring	Cuba	Matanzas	L2746996	22.19	-81.02	S17765827	CWC Area Search
Black-necked Stilt	Himantopus mexicanus	400	2019-03-19	Spring	Cuba	Ciego de Avila	L606193	22.5636	-78.6401	S54300530	Traveling
Black-necked Stilt	Himantopus mexicanus	400	2017-03-23	Spring	Puerto Rico	Cabo Rojo	L358880	17.9796	-67.1684	S35380694	Traveling
Black-necked Stilt	Himantopus mexicanus	365	2016-03-17	Spring	Saint Martin (French part)	Saint Martin (French part)	L3679707	18.1025	-63.0509	S32979617	Area
Black-necked Stilt	Himantopus mexicanus	337	2019-05-31	Spring	Puerto Rico	Cabo Rojo	L7148460	17.9567	-67.1997	S56930098	Traveling
Black-necked Stilt	Himantopus mexicanus	3500	2018-01-30	Winter	Cuba	Ciego de Avila	L3455848	22.4148	-78.417	S42712154	Traveling										3		1	1
Black-necked Stilt	Himantopus mexicanus	2425	2016-12-17	Winter	Puerto Rico	Cabo Rojo	L1252908	17.9565	-67.1996	S33094253	Traveling
Black-necked Stilt	Himantopus mexicanus	2000	2011-12-11	Winter	Puerto Rico	Santa Isabel	L360553	17.9584	-66.3634	S9343410	Traveling
Black-necked Stilt	Himantopus mexicanus	1986	2015-02-25	Winter	Dominican Republic	Monte Cristi	multi, see next tab				CWC Area Search
Black-necked Stilt	Himantopus mexicanus	1500	2013-12-30	Winter	Puerto Rico	Cabo Rojo	L682443	17.9743	-67.2111	S16333395	Stationary
Black-necked Stilt	Himantopus mexicanus	1000	2019-01-17	Winter	Cuba	Ciego de Avila	L8460547	22.2989	-78.5232	S51849613	Traveling
Black-necked Stilt	Himantopus mexicanus	988	2014-01-29	Winter	Dominican Republic	Monte Cristi	multi, see next tab				CWC Area Search
Black-necked Stilt	Himantopus mexicanus	966	2017-02-13	Winter	Dominican Republic	Monte Cristi	multi, see next tab				CWC Area Search
Black-necked Stilt	Himantopus mexicanus	813	2014-12-27	Winter	Puerto Rico	Cabo Rojo	L1252908	17.9565	-67.1996	S21059175	Traveling
Black-necked Stilt	Himantopus mexicanus	800	2019-02-28	Winter	Cuba	Ciego de Avila	L8218422	22.4374	-78.3793	S53264651	Stationary
Dunlin	Calidris alpina	150	2013-11-01	Fall	Bahamas	Central Abaco, Hope Town and Green Turtle Cay	L3455054	26.7658	-77.3255	S15540682	Traveling
Dunlin	Calidris alpina	27	2019-11-29	Fall	Puerto Rico	Ponce	L7374401	17.9692	-66.6669	S61881869	Traveling
Dunlin	Calidris alpina	20	2011-09-25	Fall	Bahamas	Inagua	L605084	21.0558	-73.3812	S8903729	CWC Area Search
Dunlin	Calidris alpina	7	2014-11-30	Fall	Bahamas	Central Abaco, Hope Town and Green Turtle Cay	L1676890	26.7522	-77.3177	S20754126	Traveling
Dunlin	Calidris alpina	4	2018-10-02	Fall	Bahamas	New Providence	L671709	24.9969	-77.413	S48885370	Traveling
Dunlin	Calidris alpina	3	2017-11-29	Fall	Cuba	La Habana	L6876000	23.1577	-82.3456	S40810961	Traveling
Dunlin	Calidris alpina	2	2018-10-29	Fall	Bahamas	Central Abaco, Hope Town and Green Turtle Cay	L3455054	26.7658	-77.3255	S49550348	Stationary
Dunlin	Calidris alpina	2	2015-11-28	Fall	Turks and Caicos Islands	Turks and Caicos Islands	L3566477	21.8344	-72.2992	S26032565	Traveling
Dunlin	Calidris alpina	80	2019-03-02	Spring	Bahamas	Central Abaco, Hope Town and Green Turtle Cay	L1676890	26.7522	-77.3177	S53297860	Traveling
Dunlin	Calidris alpina	76	2015-04-01	Spring	Bahamas	Central Abaco, Hope Town and Green Turtle Cay	L3455054	26.7658	-77.3255	S22640943	Traveling
Dunlin	Calidris alpina	50	2013-03-15	Spring	Cuba	Pinar del Rio	L2745787	22.3292	-83.2741	S17680462	CWC Area Search
Dunlin	Calidris alpina	45	2017-03-26	Spring	Bahamas	Central Abaco, Hope Town and Green Turtle Cay	L1676890	26.7522	-77.3177	S35459985	CWC Area Search
Dunlin	Calidris alpina	35	2018-03-16	Spring	Bahamas	Central Abaco, Hope Town and Green Turtle Cay	L1676890	26.7522	-77.3177	S43736074	Traveling
Dunlin	Calidris alpina	23	2018-03-21	Spring	Bahamas	South Abaco and Moore's Island	L1913607	26.0911	-77.5352	S43878686	Traveling
Dunlin	Calidris alpina	20	2016-03-09	Spring	Cuba	Matanzas	L4210311	22.1456	-81.2735	S28474985	CWC Point Count
Dunlin	Calidris alpina	9	2015-03-26	Spring	Cuba	Matanzas	L3528694	22.1341	-81.2803	S42221403	Incidental
Dunlin	Calidris alpina	6	2013-03-23	Spring	Cuba	Matanzas	L2097043	22.1108	-81.2814	S13686895	Traveling
Dunlin	Calidris alpina	5	2018-04-04	Spring	Bahamas	South Abaco and Moore's Island	L501571	26.0251	-77.3985	S44254205	Traveling
Dunlin	Calidris alpina	200	2014-02-26	Winter	Bahamas	Central Abaco, Hope Town and Green Turtle Cay	L1676890	26.7522	-77.3177	S17232720	CWC Area Search
Dunlin	Calidris alpina	150	2013-02-12	Winter	Bahamas	Central Abaco, Hope Town and Green Turtle Cay	L2141467	26.453	-77.196	S15517526	Traveling
Dunlin	Calidris alpina	100	2019-02-17	Winter	Bahamas	Central Abaco, Hope Town and Green Turtle Cay	L1676890	26.7522	-77.3177	S52851081	Traveling
Dunlin	Calidris alpina	100	2017-12-30	Winter	Bahamas	Central Abaco, Hope Town and Green Turtle Cay	L6637874	26.7532	-77.3211	S41485309	Traveling
Dunlin	Calidris alpina	70	2015-01-18	Winter	Bahamas	Central Abaco, Hope Town and Green Turtle Cay	L3455054	26.7658	-77.3255	S21436105	Traveling
Dunlin	Calidris alpina	34	2012-01-20	Winter	Cuba	Matanzas	L2616173	22.1764	-81.2384	S17608531	CWC Area Search
Dunlin	Calidris alpina	30	2016-01-04	Winter	Bahamas	Freeport and West Grand Bahama	L944325	26.6514	-78.9424	S26855725	Traveling
Dunlin	Calidris alpina	25	2016-01-20	Winter	Bahamas	East Grand Bahama	L4213649	26.5208	-77.8158	S27273678	CWC Area Search
Dunlin	Calidris alpina	20	2017-12-11	Winter	Bahamas	South Abaco and Moore's Island	L6560408	26.1405	-77.2819	S41071596	Traveling
Dunlin	Calidris alpina	18	2012-12-25	Winter	Bahamas	Central Abaco, Hope Town and Green Turtle Cay	L605031	26.7683	-77.328	S15517528	Traveling
Greater Yellowlegs	Tringa melanoleuca	860	2013-11-20	Fall	Dominican Republic	Monte Cristi	multi, see next tab				CWC Area Search
Greater Yellowlegs	Tringa melanoleuca	217	2012-08-01	Fall	Saint Martin (French part)	Saint Martin (French part)	L3679169	18.095	-63.0287	S23762587	Historical
Greater Yellowlegs	Tringa melanoleuca	200	2018-08-05	Fall	Puerto Rico	Cabo Rojo	L343336	17.9566	-67.1993	S47733249	Traveling
Greater Yellowlegs	Tringa melanoleuca	159	2015-09-06	Fall	Saint Vincent and the Grenadines	Grenadines	L1916377	12.6022	-61.4232	S25351053	Traveling
Greater Yellowlegs	Tringa melanoleuca	107	2013-11-24	Fall	Cuba	Pinar del Rio	L2745787	22.3292	-83.2741	S17682692	CWC Area Search
Greater Yellowlegs	Tringa melanoleuca	100	2012-10-01	Fall	Puerto Rico	Cabo Rojo	L1767230	17.9684	-67.1757	S12158338	Stationary
Greater Yellowlegs	Tringa melanoleuca	100	2019-08-09	Fall	Puerto Rico	Salinas	L9703553	17.9525	-66.2536	S59044124	Traveling
Greater Yellowlegs	Tringa melanoleuca	100	2019-08-15	Fall	Saint Vincent and the Grenadines	Grenadines	L3963133	12.6353	-61.3952	S59007382	Traveling
Greater Yellowlegs	Tringa melanoleuca	78	2015-10-02	Fall	Dominican Republic	Monte Cristi	multi, see next tab				Traveling
Greater Yellowlegs	Tringa melanoleuca	75	2016-09-12	Fall	Dominican Republic	Monte Cristi	multi, see next tab				CWC Area Search
Greater Yellowlegs	Tringa melanoleuca	800	2018-03-23	Spring	Cuba	Camaguey	L7144567	22.4237	-78.1641	S44173531	Stationary
Greater Yellowlegs	Tringa melanoleuca	215	2013-03-18	Spring	Cuba	Matanzas	L2746996	22.19	-81.02	S17765827	CWC Area Search
Greater Yellowlegs	Tringa melanoleuca	119	2012-03-18	Spring	Cuba	Matanzas	L2746996	22.19	-81.02	S17800688	CWC Area Search
Greater Yellowlegs	Tringa melanoleuca	100	2017-03-07	Spring	Aruba	Aruba	L2043464	12.5857	-70.0428	S35043142	Stationary
Greater Yellowlegs	Tringa melanoleuca	100	2017-03-05	Spring	Aruba	Aruba	L2820962	12.5997	-70.0531	S35100523	Stationary
Greater Yellowlegs	Tringa melanoleuca	100	2019-03-07	Spring	Cuba	Camaguey	L8807389	22.4275	-78.1621	S53615501	Stationary
Greater Yellowlegs	Tringa melanoleuca	100	2013-03-02	Spring	Puerto Rico	Cabo Rojo	L293471	17.952	-67.1959	S13322599	Traveling
Greater Yellowlegs	Tringa melanoleuca	100	2012-03-31	Spring	Puerto Rico	Cabo Rojo	L508850	17.941	-67.1921	S10370935	Traveling
Greater Yellowlegs	Tringa melanoleuca	94	2018-03-04	Spring	Bahamas	East Grand Bahama	L7037487	26.6607	-77.981	S43532646	Stationary
Greater Yellowlegs	Tringa melanoleuca	82	2018-03-17	Spring	Aruba	Aruba	L2043464	12.5857	-70.0428	S43719094	Traveling
Greater Yellowlegs	Tringa melanoleuca	700	2013-02-10	Winter	Cuba	Ciego de Avila	L2246787	22.4639	-78.162	S13182869	Traveling
Greater Yellowlegs	Tringa melanoleuca	233	2019-01-29	Winter	Dominican Republic	Monte Cristi	multi, see next tab				CWC Area Search
Greater Yellowlegs	Tringa melanoleuca	230	2018-01-24	Winter	Aruba	Aruba	L2043464	12.5857	-70.0428	S42213435	CWC Point Count
Greater Yellowlegs	Tringa melanoleuca	203	2014-01-19	Winter	Cuba	Ciego de Avila	L2875224	22.5993	-78.671	S18538223	Traveling
Greater Yellowlegs	Tringa melanoleuca	200	2018-02-28	Winter	Cuba	Ciego de Avila	L606193	22.5636	-78.6401	S49729634	Traveling
Greater Yellowlegs	Tringa melanoleuca	200	2010-02-12	Winter	Jamaica	Saint Catherine	L673843	17.9102	-77.0893	S6003608	CWC Area Search
Greater Yellowlegs	Tringa melanoleuca	200	2013-02-19	Winter	Puerto Rico	Cabo Rojo	L1990536	17.9573	-67.2053	S13145976	Traveling
Greater Yellowlegs	Tringa melanoleuca	200	2014-12-21	Winter	Puerto Rico	Cabo Rojo	L293471	17.952	-67.1959	S21049141	Traveling
Greater Yellowlegs	Tringa melanoleuca	200	2016-01-04	Winter	Puerto Rico	Cabo Rojo	L343336	17.9566	-67.1993	S26765164	Traveling
Greater Yellowlegs	Tringa melanoleuca	192	2014-02-18	Winter	Cuba	Matanzas	L2746996	22.19	-81.02	S17801120	CWC Area Search
Hudsonian Godwit	Limosa haemastica	30	2010-10-11	Fall	Virgin Islands (U.S.)	Saint Croix	L1007003	17.722	-64.8039	S6981884	Stationary
Hudsonian Godwit	Limosa haemastica	27	2016-09-03	Fall	Puerto Rico	Dorado	L4898900	18.4678	-66.2371	S31413271	Traveling
Hudsonian Godwit	Limosa haemastica	12	2017-09-08	Fall	Puerto Rico	Toa Baja	L1275979	18.4483	-66.2464	S41985790	Traveling
Hudsonian Godwit	Limosa haemastica	11	2019-09-26	Fall	Puerto Rico	Toa Baja	L4959345	18.4453	-66.2426	S60225833	Traveling
Hudsonian Godwit	Limosa haemastica	10	2015-10-09	Fall	Puerto Rico	Camuy	L1807546	18.4829	-66.8885	S25358715	Stationary
Hudsonian Godwit	Limosa haemastica	10	2017-10-25	Fall	Trinidad and Tobago	Tunapuna-Piarco	L621491	10.5989	-61.4007	S40113491	Traveling
Hudsonian Godwit	Limosa haemastica	9	2019-09-07	Fall	Barbados	Saint Lucy	L6350532	13.2938	-59.6345	S59572074	Stationary
Hudsonian Godwit	Limosa haemastica	9	2011-09-14	Fall	Puerto Rico	Toa Baja	L616056	18.4477	-66.2468	S8812339	Stationary
Hudsonian Godwit	Limosa haemastica	9	2018-11-10	Fall	Trinidad and Tobago	San Juan-Laventille	L7174939	10.6324	-61.4466	S49830977	Traveling
Hudsonian Godwit	Limosa haemastica	8	2015-10-21	Fall	Puerto Rico	Ponce	L2942021	17.974	-66.6008	S25501429	Traveling
Hudsonian Godwit	Limosa haemastica	3	2019-03-22	Spring	Puerto Rico	Lajas	L8896579	17.9767	-67.0127	S54125465	Stationary
Hudsonian Godwit	Limosa haemastica	2	2018-04-13	Spring	Barbados	Saint Philip	L1888700	13.1246	-59.4606	S44863084	Traveling
Killdeer	Charadrius vociferus	83	2015-11-17	Fall	Bahamas	New Providence	L1619559	25.0785	-77.3705	S25875119	Traveling
Killdeer	Charadrius vociferus	77	2018-09-24	Fall	Puerto Rico	Dorado	L7947640	18.4645	-66.3024	S48737550	Traveling
Killdeer	Charadrius vociferus	71	2016-11-30	Fall	Bahamas	New Providence	L5116978	25.0176	-77.2904	S32800390	Stationary
Killdeer	Charadrius vociferus	65	2015-11-23	Fall	Bahamas	Freeport and West Grand Bahama	L813455	26.5656	-78.6656	S25973475	Traveling
Killdeer	Charadrius vociferus	65	2018-11-13	Fall	Bahamas	Freeport and West Grand Bahama	L813455	26.5656	-78.6656	S49929225	International Shorebird Survey (ISS)
Killdeer	Charadrius vociferus	55	2013-10-01	Fall	Puerto Rico	Toa Baja	L1768578	18.4501	-66.2417	S15303408	Traveling
Killdeer	Charadrius vociferus	53	2019-10-19	Fall	Bahamas	Freeport and West Grand Bahama	L813455	26.5656	-78.6656	S60759162	International Shorebird Survey (ISS)
Killdeer	Charadrius vociferus	51	2016-09-01	Fall	Puerto Rico	Toa Baja	L3913586	18.4465	-66.2413	S31372463	Traveling
Killdeer	Charadrius vociferus	50	2018-08-10	Fall	Bahamas	Freeport and West Grand Bahama	L791657	26.5119	-78.6489	S47770794	International Shorebird Survey (ISS)
Killdeer	Charadrius vociferus	48	2016-08-06	Fall	Bahamas	Freeport and West Grand Bahama	L791657	26.5119	-78.6489	S30998776	Traveling
Killdeer	Charadrius vociferus	70	2015-03-15	Spring	Haiti	Ouest	L352517	18.6394	-72.1457	S27001512	Traveling
Killdeer	Charadrius vociferus	58	2013-03-20	Spring	Cuba	Matanzas	L2746996	22.19	-81.02	S17765851	CWC Area Search
Killdeer	Charadrius vociferus	58	2019-04-02	Spring	Dominican Republic	La Altagracia	L2524995	18.5137	-68.3801	S54841052	Traveling
Killdeer	Charadrius vociferus	45	2017-03-20	Spring	Bahamas	Freeport and West Grand Bahama	L791662	26.6939	-78.9745	S35318720	Traveling
Killdeer	Charadrius vociferus	44	2010-03-14	Spring	Bahamas	Freeport and West Grand Bahama	L791662	26.6939	-78.9745	S6131379	Traveling
Killdeer	Charadrius vociferus	33	2019-04-18	Spring	Cuba	Matanzas	L7937483	22.338	-80.9928	S55264704	Traveling
Killdeer	Charadrius vociferus	30	2018-03-13	Spring	Bahamas	Freeport and West Grand Bahama	L813455	26.5656	-78.6656	S43617444	Traveling
Killdeer	Charadrius vociferus	27	2018-03-03	Spring	Bahamas	Freeport and West Grand Bahama	L791662	26.6939	-78.9745	S43450485	Traveling
Killdeer	Charadrius vociferus	26	2019-04-26	Spring	Bahamas	Freeport and West Grand Bahama	L813455	26.5656	-78.6656	S55447829	International Shorebird Survey (ISS)
Killdeer	Charadrius vociferus	26	2012-03-22	Spring	Cuba	Pinar del Rio	L2745787	22.3292	-83.2741	S17678591	CWC Area Search
Killdeer	Charadrius vociferus	26	2012-03-20	Spring	Cuba	Matanzas	L2746996	22.19	-81.02	S17800799	CWC Area Search
Killdeer	Charadrius vociferus	232	2018-01-12	Winter	Bahamas	Freeport and West Grand Bahama	L791662	26.6939	-78.9745	S41967226	Traveling
Killdeer	Charadrius vociferus	200	2019-01-26	Winter	Cuba	La Habana	L2095012	23.04	-82.4936	S52309728	Stationary
Killdeer	Charadrius vociferus	180	2017-01-03	Winter	Bahamas	Freeport and West Grand Bahama	L791662	26.6939	-78.9745	S33414619	Traveling
Killdeer	Charadrius vociferus	145	2014-01-05	Winter	Bahamas	Freeport and West Grand Bahama	L791662	26.6939	-78.9745	S16242785	Traveling
Killdeer	Charadrius vociferus	123	2019-01-17	Winter	Bahamas	New Providence	L605049	24.9926	-77.3634	S51787735	Traveling
Killdeer	Charadrius vociferus	100	2015-12-07	Winter	Bahamas	New Providence	L3946824	25.0071	-77.3363	S26235126	Traveling
Killdeer	Charadrius vociferus	82	2017-12-17	Winter	Bahamas	New Providence	L6701733	25.0391	-77.3004	S41818819	Traveling
Killdeer	Charadrius vociferus	70	2018-01-05	Winter	Bahamas	Central Abaco, Hope Town and Green Turtle Cay	L5160945	26.3952	-77.0961	S41813467	Traveling
Killdeer	Charadrius vociferus	70	2018-01-10	Winter	Bahamas	New Providence	L6159592	25.0177	-77.2907	S41801340	Stationary
Killdeer	Charadrius vociferus	70	2016-01-15	Winter	Bahamas	Freeport and West Grand Bahama	L791662	26.6939	-78.9745	S26914569	Traveling
Least Sandpiper	Calidris minutilla	4287	2013-11-24	Fall	Cuba	Pinar del Rio	L2745787	22.3292	-83.2741	S17682692	CWC Area Search
Least Sandpiper	Calidris minutilla	2135	2012-10-09	Fall	Dominican Republic	Monte Cristi	multi, see next tab				CWC Area Search
Least Sandpiper	Calidris minutilla	1859	2013-11-19	Fall	Dominican Republic	Monte Cristi	multi, see next tab				CWC Area Search
Least Sandpiper	Calidris minutilla	1316	2013-09-09	Fall	Saint Martin (French part)	Saint Martin (French part)	L3679169	18.095	-63.0287	S23748906	Historical
Least Sandpiper	Calidris minutilla	1200	2019-09-26	Fall	Cuba	Pinar del Rio	L10283252	22.3467	-83.2094	S62269459	Traveling
Least Sandpiper	Calidris minutilla	1000	2019-10-10	Fall	Cuba	Villa Clara	L8212109	22.7317	-79.65	S60578443	Traveling
Least Sandpiper	Calidris minutilla	1000	2019-11-21	Fall	Jamaica	Clarendon	L10068535	17.7695	-77.2272	S61687575	Stationary
Least Sandpiper	Calidris minutilla	842	2012-11-24	Fall	Cuba	Pinar del Rio	L2745787	22.3292	-83.2741	S17679195	CWC Area Search
Least Sandpiper	Calidris minutilla	800	2018-11-12	Fall	Jamaica	Saint Catherine	L673843	17.9102	-77.0893	S49892970	Stationary
Least Sandpiper	Calidris minutilla	570	2010-11-30	Fall	Puerto Rico	Salinas	L548090	17.9498	-66.2599	S7186177	Traveling
Least Sandpiper	Calidris minutilla	1356	2012-03-13	Spring	Dominican Republic	Monte Cristi	multi, see next tab				CWC Area Search
Least Sandpiper	Calidris minutilla	800	2016-03-20	Spring	Jamaica	Saint Catherine	L719926	17.998	-76.8634	S28457768	Traveling
Least Sandpiper	Calidris minutilla	748	2012-03-22	Spring	Cuba	Pinar del Rio	L2745787	22.3292	-83.2741	S17678591	CWC Area Search
Least Sandpiper	Calidris minutilla	600	2019-03-20	Spring	Puerto Rico	Cabo Rojo	L293474	17.9359	-67.192	S54048462	Traveling
Least Sandpiper	Calidris minutilla	545	2019-03-31	Spring	Cayman Islands	East End	L884962	19.3365	-81.0862	S54430523	Traveling
Least Sandpiper	Calidris minutilla	505	2019-03-07	Spring	Cuba	La Habana	L8809462	23.1409	-82.3255	S53582373	Stationary
Least Sandpiper	Calidris minutilla	443	2013-03-15	Spring	Cuba	Pinar del Rio	L2745787	22.3292	-83.2741	S17680462	CWC Area Search
Least Sandpiper	Calidris minutilla	400	2013-03-17	Spring	Cuba	La Habana	L3326779	23.1561	-82.3491	S21598534	Traveling
Least Sandpiper	Calidris minutilla	320	2017-03-05	Spring	Turks and Caicos Islands	Turks and Caicos Islands	L5040187	21.7685	-72.1929	S34990213	Historical
Least Sandpiper	Calidris minutilla	300	2013-03-11	Spring	Cuba	Matanzas	L3528694	22.1341	-81.2803	S15504660	Traveling
Least Sandpiper	Calidris minutilla	300	2017-03-01	Spring	Cuba	Ciego de Avila	L5533893	22.4453	-78.3009	S34930865	Stationary
Least Sandpiper	Calidris minutilla	4000	2010-02-12	Winter	Jamaica	Saint Catherine	L673843	17.9102	-77.0893	S6003608	CWC Area Search
Least Sandpiper	Calidris minutilla	2830	2019-01-25	Winter	Jamaica	Saint Catherine	L3080268	17.9125	-77.0903	S52079433	CWC Point Count
Least Sandpiper	Calidris minutilla	2200	2019-02-14	Winter	Cuba	Sancti Spiritus	L8610937	21.7578	-79.9873	S52725874	Traveling
Least Sandpiper	Calidris minutilla	2025	2019-01-28	Winter	Dominican Republic	Monte Cristi	multi, see next tab				CWC Area Search
Least Sandpiper	Calidris minutilla	2000	2019-02-14	Winter	Cuba	Sancti Spiritus	L8634202	21.6497	-79.5479	S52807811	Stationary
Least Sandpiper	Calidris minutilla	2000	2013-02-21	Winter	Jamaica	Saint Catherine	L673843	17.9102	-77.0893	S13154599	CWC Point Count
Least Sandpiper	Calidris minutilla	2000	2010-02-16	Winter	Jamaica	Saint Catherine	L719926	17.998	-76.8634	S6004016	CWC Area Search
Least Sandpiper	Calidris minutilla	1550	2014-01-30	Winter	Cuba	Pinar del Rio	L2745787	22.3292	-83.2741	S17683301	CWC Area Search
Least Sandpiper	Calidris minutilla	1235	2013-01-22	Winter	Cuba	Pinar del Rio	L2745787	22.3292	-83.2741	S17679526	CWC Area Search
Least Sandpiper	Calidris minutilla	1200	2012-01-07	Winter	Jamaica	Saint Catherine	L719926	17.998	-76.8634	S9523465	Area
Lesser Yellowlegs	Tringa flavipes	3219	2013-11-20	Fall	Dominican Republic	Monte Cristi	multi, see next tab				CWC Area Search
Lesser Yellowlegs	Tringa flavipes	2350	2017-07-31	Fall	Puerto Rico	Cabo Rojo	L1252908	17.9565	-67.1996	S38418654	Traveling
Lesser Yellowlegs	Tringa flavipes	1823	2015-08-10	Fall	Puerto Rico	Cabo Rojo	L343336	17.9566	-67.1993	S31147091	Traveling
Lesser Yellowlegs	Tringa flavipes	1001	2011-08-19	Fall	Puerto Rico	Cabo Rojo	L1252908	17.9565	-67.1996	S9288276	Traveling
Lesser Yellowlegs	Tringa flavipes	940	2018-08-05	Fall	Puerto Rico	Cabo Rojo	L1252908	17.9565	-67.1996	S47700940	Traveling
Lesser Yellowlegs	Tringa flavipes	886	2019-11-30	Fall	Dominican Republic	Monte Cristi	multi, see next tab				Stationary
Lesser Yellowlegs	Tringa flavipes	814	2019-11-01	Fall	Puerto Rico	Cabo Rojo	L3073913	17.9682	-67.183	S61091541	Traveling
Lesser Yellowlegs	Tringa flavipes	753	2015-10-02	Fall	Dominican Republic	Monte Cristi	multi, see next tab				Traveling
Lesser Yellowlegs	Tringa flavipes	600	2014-10-07	Fall	Dominican Republic	María Trinidad Sánchez	L3129873	19.4096	-69.8703	S20354777	CWC Area Search
Lesser Yellowlegs	Tringa flavipes	600	2012-08-25	Fall	Puerto Rico	Cabo Rojo	L343336	17.9566	-67.1993	S11440103	Traveling
Lesser Yellowlegs	Tringa flavipes	1030	2017-04-01	Spring	Puerto Rico	Cabo Rojo	L343336	17.9566	-67.1993	S35622995	Traveling
Lesser Yellowlegs	Tringa flavipes	500	2019-03-21	Spring	Puerto Rico	Cabo Rojo	L2332801	17.9379	-67.1935	S54188281	Traveling
Lesser Yellowlegs	Tringa flavipes	481	2013-03-19	Spring	Dominican Republic	Monte Cristi	multi, see next tab				CWC Area Search
Lesser Yellowlegs	Tringa flavipes	350	2017-03-23	Spring	Puerto Rico	Cabo Rojo	L358880	17.9796	-67.1684	S35407644	Traveling
Lesser Yellowlegs	Tringa flavipes	246	2019-03-11	Spring	Puerto Rico	Cabo Rojo	L7148460	17.9567	-67.1997	S53708697	Traveling
Lesser Yellowlegs	Tringa flavipes	224	2019-04-18	Spring	Cuba	Matanzas	L7937483	22.338	-80.9928	S55264704	Traveling
Lesser Yellowlegs	Tringa flavipes	200	2017-03-10	Spring	Aruba	Aruba	L856498	12.5615	-70.0483	S35094002	Traveling
Lesser Yellowlegs	Tringa flavipes	200	2011-03-17	Spring	Cuba	Ciego de Avila	L3996710	22.508	-78.3674	S25752149	Incidental
Lesser Yellowlegs	Tringa flavipes	200	2016-04-04	Spring	Cuba	Ciego de Avila	L4455915	22.1018	-78.6686	S28744658	Stationary
Lesser Yellowlegs	Tringa flavipes	200	2017-03-04	Spring	Cuba	Sancti Spiritus	L5589198	21.6751	-79.1602	S35270920	Traveling
Lesser Yellowlegs	Tringa flavipes	200	2018-03-16	Spring	Cuba	Camaguey	L7005959	22.4204	-78.1658	S43755441	Traveling
Lesser Yellowlegs	Tringa flavipes	1000	2012-02-19	Winter	Puerto Rico	Cabo Rojo	L1430408	17.9587	-67.2044	S10041336	Traveling
Lesser Yellowlegs	Tringa flavipes	945	2013-12-28	Winter	Puerto Rico	Cabo Rojo	L1252908	17.9565	-67.1996	S16113784	Traveling
Lesser Yellowlegs	Tringa flavipes	840	2016-12-17	Winter	Puerto Rico	Cabo Rojo	L1252908	17.9565	-67.1996	S33094253	Traveling
Lesser Yellowlegs	Tringa flavipes	614	2019-01-29	Winter	Dominican Republic	Monte Cristi	multi, see next tab				CWC Area Search
Lesser Yellowlegs	Tringa flavipes	600	2010-02-12	Winter	Jamaica	Saint Catherine	L673843	17.9102	-77.0893	S6003608	CWC Area Search
Lesser Yellowlegs	Tringa flavipes	443	2017-01-29	Winter	Puerto Rico	Cabo Rojo	L1268031	17.9614	-67.2099	S34078631	CWC Point Count
Lesser Yellowlegs	Tringa flavipes	395	2014-01-30	Winter	Cuba	Pinar del Rio	L2745787	22.3292	-83.2741	S17683301	CWC Area Search
Lesser Yellowlegs	Tringa flavipes	350	2014-12-31	Winter	Puerto Rico	Cabo Rojo	L343336	17.9566	-67.1993	S21551313	Traveling
Lesser Yellowlegs	Tringa flavipes	300	2017-01-20	Winter	Cuba	Matanzas	L3726484	22.4068	-81.4462	S34632864	Traveling
Lesser Yellowlegs	Tringa flavipes	286	2018-12-27	Winter	Cuba	Pinar del Rio	L10269845	22.4299	-83.2167	S62416856	Traveling
Pectoral Sandpiper	Calidris melanotos	225	2017-10-11	Fall	Guadeloupe	Guadeloupe	L4819881	16.442	-61.5235	S39826736	Traveling
Pectoral Sandpiper	Calidris melanotos	190	2016-09-08	Fall	Puerto Rico	Lajas	L1332374	18.0158	-67.0751	S31483248	Stationary
Pectoral Sandpiper	Calidris melanotos	185	2019-09-25	Fall	Puerto Rico	Toa Baja	L1275979	18.4483	-66.2464	S60245871	Traveling
Pectoral Sandpiper	Calidris melanotos	155	2019-10-22	Fall	Barbados	Saint Lucy	L4025466	13.295	-59.6341	S60848955	Traveling
Pectoral Sandpiper	Calidris melanotos	150	2014-09-21	Fall	Puerto Rico	Lajas	L364725	18.0117	-67.1013	S20227341	Traveling
Pectoral Sandpiper	Calidris melanotos	150	2013-10-20	Fall	Puerto Rico	Cabo Rojo	L986749	18.0166	-67.1515	S16160523	Stationary
Pectoral Sandpiper	Calidris melanotos	130	2011-09-15	Fall	Puerto Rico	Toa Baja	L616056	18.4477	-66.2468	S8817892	Stationary
Pectoral Sandpiper	Calidris melanotos	120	2011-09-16	Fall	Puerto Rico	Toa Baja	L1300361	18.449	-66.245	S9013884	Incidental
Pectoral Sandpiper	Calidris melanotos	116	2013-10-21	Fall	Puerto Rico	Cabo Rojo	L358880	17.9796	-67.1684	S15571842	Traveling
Pectoral Sandpiper	Calidris melanotos	110	2015-10-08	Fall	Barbados	Saint Philip	L3633238	13.127	-59.4638	S25348342	Stationary
Pectoral Sandpiper	Calidris melanotos	48	2010-03-14	Spring	Bahamas	Freeport and West Grand Bahama	L791662	26.6939	-78.9745	S6131379	Traveling
Pectoral Sandpiper	Calidris melanotos	20	2015-05-01	Spring	Bahamas	Freeport and West Grand Bahama	L687541	26.5445	-78.6848	S23164694	Traveling
Pectoral Sandpiper	Calidris melanotos	8	2017-03-21	Spring	Barbados	Christ Church	L1133547	13.1018	-59.499	S35338005	Traveling
Pectoral Sandpiper	Calidris melanotos	7	2017-05-10	Spring	Saint Martin (French part)	Saint Martin (French part)	L3679159	18.0805	-63.0185	S36747750	Traveling
Pectoral Sandpiper	Calidris melanotos	6	2018-05-28	Spring	Cayman Islands	George Town	L1264663	19.2894	-81.3729	S46110783	Stationary
Pectoral Sandpiper	Calidris melanotos	6	2016-03-18	Spring	Puerto Rico	Lajas	L323787	18.0145	-67.0979	S53933356	Traveling
Pectoral Sandpiper	Calidris melanotos	5	2016-05-14	Spring	Aruba	Aruba	L2043464	12.5857	-70.0428	S29657040	Traveling
Pectoral Sandpiper	Calidris melanotos	5	2015-04-30	Spring	Bahamas	Freeport and West Grand Bahama	L791662	26.6939	-78.9745	S23156537	Traveling
Pectoral Sandpiper	Calidris melanotos	4	2015-05-15	Spring	Aruba	Aruba	L856498	12.5615	-70.0483	S23451610	Stationary
Pectoral Sandpiper	Calidris melanotos	4	2017-04-08	Spring	Cuba	Ciego de Avila	L5831548	22.6104	-78.6953	S36822721	Random
Pectoral Sandpiper	Calidris melanotos	4	2013-04-27	Spring	Puerto Rico	Camuy	L2146694	18.4822	-66.8869	S13945885	Stationary
Pectoral Sandpiper	Calidris melanotos	12	2012-01-22	Winter	Puerto Rico	Guánica	L1060737	17.9503	-66.8768	S9687473	Stationary
Pectoral Sandpiper	Calidris melanotos	9	2010-01-22	Winter	Puerto Rico	Camuy	L690221	18.4851	-66.8769	S5795793	Stationary
Pectoral Sandpiper	Calidris melanotos	8	2019-12-12	Winter	Trinidad and Tobago	Western Tobago	L623632	11.1621	-60.8301	S62276446	Traveling
Pectoral Sandpiper	Calidris melanotos	7	2019-01-28	Winter	Dominican Republic	Monte Cristi	L2455677	19.856	-71.6562	S53695977	CWC Area Search
Pectoral Sandpiper	Calidris melanotos	6	2017-01-20	Winter	Cuba	Matanzas	L5372255	22.1861	-81.2468	S33960510	Traveling
Pectoral Sandpiper	Calidris melanotos	5	2019-02-04	Winter	Puerto Rico	Cabo Rojo	L358880	17.9796	-67.1684	S52385305	Traveling
Pectoral Sandpiper	Calidris melanotos	4	2016-01-12	Winter	Puerto Rico	Cabo Rojo	L293471	17.952	-67.1959	S26894195	Stationary
Pectoral Sandpiper	Calidris melanotos	3	2015-12-05	Winter	Aruba	Aruba	L856498	12.5615	-70.0483	S26263028	Stationary
Pectoral Sandpiper	Calidris melanotos	3	2018-12-26	Winter	Barbados	Saint Philip	L2603876	13.1102	-59.4912	S50961781	Traveling
Pectoral Sandpiper	Calidris melanotos	3	2013-01-19	Winter	Cuba	Ciego de Avila	L8385925	22.5248	-78.3371	S50885591	Incidental
Pectoral Sandpiper	Calidris melanotos	3	2014-02-02	Winter	Puerto Rico	Camuy	L341215	18.4891	-66.8677	S16774720	CWC Point Count
Piping Plover	Charadrius melodus	153	2016-10-31	Fall	Bahamas	Berry Islands	L5116984	25.6475	-77.8264	S32800470	Traveling
Piping Plover	Charadrius melodus	84	2016-10-31	Fall	Bahamas	Berry Islands	L5054916	25.6962	-77.8156	S32344308	Stationary
Piping Plover	Charadrius melodus	83	2015-09-29	Fall	Bahamas	North Andros	L4346365	25.3282	-78.1372	S28026513	CWC Area Search
Piping Plover	Charadrius melodus	80	2017-11-12	Fall	Bahamas	North Andros	L4346365	25.3282	-78.1372	S40490157	Area
Piping Plover	Charadrius melodus	76	2016-11-18	Fall	Bahamas	North Andros	L5088018	24.6646	-77.7513	S32608459	Traveling
Piping Plover	Charadrius melodus	58	2016-11-16	Fall	Bahamas	North Andros	L5086359	24.8436	-77.8934	S32583674	Traveling
Piping Plover	Charadrius melodus	50	2015-11-14	Fall	Bahamas	South Abaco and Moore's Island	L1606653	26.1421	-77.183	S25822717	Traveling
Piping Plover	Charadrius melodus	49	2016-11-12	Fall	Bahamas	South Abaco and Moore's Island	L1606653	26.1421	-77.183	S32497724	Traveling
Piping Plover	Charadrius melodus	45	2017-11-18	Fall	Bahamas	South Abaco and Moore's Island	L1606653	26.1421	-77.183	S40584694	Traveling
Piping Plover	Charadrius melodus	43	2013-10-19	Fall	Bahamas	North Andros	L2397584	24.6833	-77.75	S15482739	Stationary
Piping Plover	Charadrius melodus	42	2013-03-09	Spring	Bahamas	North Andros	L1425657	24.8505	-77.8994	S13362881	Traveling
Piping Plover	Charadrius melodus	25	2019-03-11	Spring	Bahamas	Central Abaco, Hope Town and Green Turtle Cay	L8347042	26.2894	-77.0611	S53721751	Traveling
Piping Plover	Charadrius melodus	19	2010-04-11	Spring	Bahamas	Central Abaco, Hope Town and Green Turtle Cay	L891474	26.2952	-77.0826	S6306423	Stationary
Piping Plover	Charadrius melodus	15	2012-04-05	Spring	Bahamas	North Andros	L799414	24.8486	-77.8979	S10376688	Traveling
Piping Plover	Charadrius melodus	14	2019-03-14	Spring	Bahamas	Exuma and Black Point	L8138761	23.4737	-75.6957	S54530038	Traveling
Piping Plover	Charadrius melodus	14	2019-03-03	Spring	Bahamas	North Andros	L8700272	24.6686	-77.7493	S53318024	Stationary
Piping Plover	Charadrius melodus	13	2017-03-11	Spring	Bahamas	Central Abaco, Hope Town and Green Turtle Cay	L2981475	26.2859	-77.0581	S35129351	CWC Area Search
Piping Plover	Charadrius melodus	12	2014-03-04	Spring	Bahamas	Central Abaco, Hope Town and Green Turtle Cay	L2676888	26.6705	-77.1184	S17332338	Traveling
Piping Plover	Charadrius melodus	11	2018-03-04	Spring	Bahamas	Freeport and West Grand Bahama	L808822	26.5422	-78.5687	S43501645	Traveling
Piping Plover	Charadrius melodus	11	2019-03-14	Spring	Cuba	Villa Clara	L8924736	22.795	-79.5639	S54270329	Traveling
Piping Plover	Charadrius melodus	158	2017-02-05	Winter	Bahamas	Berry Islands	L5520393	25.6475	-77.8249	S34837126	Stationary
Piping Plover	Charadrius melodus	88	2017-01-17	Winter	Turks and Caicos Islands	Turks and Caicos Islands	L5388080	21.5733	-71.5007	S34060522	Traveling
Piping Plover	Charadrius melodus	77	2016-02-01	Winter	Bahamas	Exuma and Black Point	L4278248	23.4634	-75.6708	S27623108	Traveling
Piping Plover	Charadrius melodus	71	2016-02-04	Winter	Bahamas	North Andros	L1110747	24.8514	-77.9026	S28054698	CWC Area Search
Piping Plover	Charadrius melodus	60	2019-01-06	Winter	Bahamas	Freeport and West Grand Bahama	L8381443	26.585	-78.6766	S51385208	Traveling
Piping Plover	Charadrius melodus	56	2019-01-20	Winter	Turks and Caicos Islands	Turks and Caicos Islands	L8576009	21.5738	-71.5036	S52493424	CWC Traveling Count
Piping Plover	Charadrius melodus	54	2017-02-01	Winter	Bahamas	North Andros	L4346365	25.3282	-78.1372	S34837185	Stationary
Piping Plover	Charadrius melodus	47	2019-01-01	Winter	Bahamas	Central Abaco, Hope Town and Green Turtle Cay	L8347042	26.2894	-77.0611	S51196536	Traveling
Piping Plover	Charadrius melodus	42	2016-01-30	Winter	Turks and Caicos Islands	Turks and Caicos Islands	L6372191	21.5726	-71.5004	S27217323	Traveling
Piping Plover	Charadrius melodus	41	2016-01-18	Winter	Bahamas	South Abaco and Moore's Island	L1587724	26.1414	-77.1868	S26989154	Traveling
Piping Plover	Charadrius melodus	40	2011-02-23	Winter	Bahamas	North Andros	L1110747	24.8514	-77.9026	S7824481	Stationary
Piping Plover	Charadrius melodus	40	2017-02-07	Winter	Bahamas	North Andros	L1110733	24.845	-77.8997	S34831320	Traveling
Red Knot	Calidris canutus	38	2012-10-17	Fall	Bahamas	Central Abaco, Hope Town and Green Turtle Cay	L1676890	26.7522	-77.3177	S11837595	Stationary
Red Knot	Calidris canutus	38	2016-10-29	Fall	Bahamas	Central Abaco, Hope Town and Green Turtle Cay	L3455054	26.7658	-77.3255	S32306115	Traveling
Red Knot	Calidris canutus	35	2010-11-01	Fall	Bahamas	Central Abaco, Hope Town and Green Turtle Cay	L1676890	26.7522	-77.3177	S7059046	Stationary
Red Knot	Calidris canutus	25	2011-11-28	Fall	Cuba	Matanzas	L1327370	23.1908	-81.1518	S9239643	Traveling
Red Knot	Calidris canutus	21	2013-11-01	Fall	Bahamas	Central Abaco, Hope Town and Green Turtle Cay	L3455054	26.7658	-77.3255	S15540682	Traveling
Red Knot	Calidris canutus	21	2019-10-26	Fall	Caribbean Netherlands	Bonaire	L10084327	12.1582	-68.2543	S60963891	Traveling
Red Knot	Calidris canutus	19	2011-10-27	Fall	Bahamas	Central Abaco, Hope Town and Green Turtle Cay	L3455054	26.7658	-77.3255	S15517570	Traveling
Red Knot	Calidris canutus	18	2012-09-02	Fall	Puerto Rico	Vega Baja	L1557785	18.4855	-66.3846	S11528501	Stationary
Red Knot	Calidris canutus	17	2015-09-29	Fall	Bahamas	North Andros	L4346365	25.3282	-78.1372	S28026513	CWC Area Search
Red Knot	Calidris canutus	16	2018-10-29	Fall	Bahamas	Central Abaco, Hope Town and Green Turtle Cay	L3455054	26.7658	-77.3255	S49550348	Stationary
Red Knot	Calidris canutus	16	2019-09-20	Fall	Trinidad and Tobago	Couva-Tabaquite-Talparo	L471430	10.4811	-61.4743	S59958586	CWC Traveling Count
Red Knot	Calidris canutus	100	2016-03-20	Spring	Cuba	Ciego de Avila	L3818647	22.5966	-78.6659	S42961316	Stationary
Red Knot	Calidris canutus	100	2019-03-13	Spring	Cuba	Ciego de Avila	L8716713	22.5832	-78.6538	S53783183	Stationary
Red Knot	Calidris canutus	60	2018-03-16	Spring	Cuba	Ciego de Avila	L7083050	22.5887	-78.6547	S43790187	Traveling
Red Knot	Calidris canutus	60	2018-05-05	Spring	Trinidad and Tobago	Couva-Tabaquite-Talparo	L620681	10.4628	-61.481	S45336078	Stationary
Red Knot	Calidris canutus	50	2016-03-05	Spring	Cuba	Matanzas	L3528694	22.1341	-81.2803	S28136655	Traveling
Red Knot	Calidris canutus	38	2017-03-10	Spring	Cuba	Ciego de Avila	L606193	22.5636	-78.6401	S35142958	Traveling
Red Knot	Calidris canutus	25	2019-03-23	Spring	Puerto Rico	Ponce	L7374401	17.9692	-66.6669	S62592196	Traveling
Red Knot	Calidris canutus	22	2017-03-01	Spring	Cuba	Ciego de Avila	L5533893	22.4453	-78.3009	S34930865	Stationary
Red Knot	Calidris canutus	20	2016-05-14	Spring	Trinidad and Tobago	Couva-Tabaquite-Talparo	L621489	10.484	-61.4711	S43906005	Stationary
Red Knot	Calidris canutus	20	2017-04-05	Spring	Virgin Islands (British)	Virgin Islands (British)	L767576	18.7367	-64.3552	S35712630	Traveling
Red Knot	Calidris canutus	410	2017-01-20	Winter	Turks and Caicos Islands	Turks and Caicos Islands	L5282214	21.6461	-71.774	S33811669	Traveling
Red Knot	Calidris canutus	184	2019-01-30	Winter	Turks and Caicos Islands	Turks and Caicos Islands	L8576020	21.6468	-71.7727	S52493437	CWC Traveling Count
Red Knot	Calidris canutus	90	2016-02-09	Winter	Caribbean Netherlands	Bonaire	L3288877	12.0292	-68.2447	S27403124	Traveling
Red Knot	Calidris canutus	40	2017-02-10	Winter	Cuba	Matanzas	L5518742	22.1112	-81.2034	S34825948	Traveling
Red Knot	Calidris canutus	40	2018-02-28	Winter	Cuba	Ciego de Avila	L606193	22.5636	-78.6401	S43350628	Traveling
Red Knot	Calidris canutus	36	2014-02-03	Winter	Bahamas	Central Abaco, Hope Town and Green Turtle Cay	L1676890	26.7522	-77.3177	S17232695	CWC Area Search
Red Knot	Calidris canutus	34	2016-02-10	Winter	Caribbean Netherlands	Bonaire	L4291728	12.0606	-68.2369	S27707163	Traveling
Red Knot	Calidris canutus	24	2018-02-21	Winter	Cuba	Matanzas	L6999800	22.1736	-81.2565	S43263168	Traveling
Red Knot	Calidris canutus	20	2019-02-26	Winter	Cuba	Matanzas	L2616173	22.1764	-81.2384	S53458775	CWC Area Search
Red Knot	Calidris canutus	20	2017-01-27	Winter	Cuba	Ciego de Avila	L3818647	22.5966	-78.6659	S34924542	Traveling
Red Knot	Calidris canutus	20	2019-01-02	Winter	Trinidad and Tobago	Couva-Tabaquite-Talparo	L620681	10.4628	-61.481	S51219499	Stationary
Red Knot	Calidris canutus	20	2017-01-04	Winter	Trinidad and Tobago	Couva-Tabaquite-Talparo	L621489	10.484	-61.4711	S33568807	Stationary
Ruddy Turnstone	Arenaria interpres	210	2018-09-14	Fall	Barbados	Christ Church	L3904790	13.0544	-59.5028	S48501714	Traveling
Ruddy Turnstone	Arenaria interpres	176	2011-09-15	Fall	Guadeloupe	Guadeloupe	L891659	16.1748	-61.1101	S9265114	CWC Area Search
Ruddy Turnstone	Arenaria interpres	131	2012-10-06	Fall	Haiti	Ouest	L2350762	18.5867	-72.0391	S15140229	Traveling
Ruddy Turnstone	Arenaria interpres	125	2012-09-12	Fall	Guadeloupe	Guadeloupe	L891659	16.1748	-61.1101	S13400073	CWC Area Search
Ruddy Turnstone	Arenaria interpres	103	2010-11-16	Fall	Guadeloupe	Guadeloupe	L891659	16.1748	-61.1101	S7590913	CWC Area Search
Ruddy Turnstone	Arenaria interpres	100	2012-11-03	Fall	Cayman Islands	West Bay	L1809341	19.3803	-81.4163	S12062271	Incidental
Ruddy Turnstone	Arenaria interpres	100	2013-11-11	Fall	Turks and Caicos Islands	Turks and Caicos Islands	L2525523	21.7877	-72.1979	S20663890	Traveling
Ruddy Turnstone	Arenaria interpres	98	2019-11-22	Fall	Barbados	Saint Philip	L1888700	13.1246	-59.4606	S61654877	Stationary
Ruddy Turnstone	Arenaria interpres	97	2016-08-27	Fall	Bahamas	Freeport and West Grand Bahama	L791662	26.6939	-78.9745	S31287984	Traveling
Ruddy Turnstone	Arenaria interpres	97	2019-11-29	Fall	Barbados	Saint Philip	L1888700	13.1246	-59.4606	S61848010	Stationary
Ruddy Turnstone	Arenaria interpres	200	2013-03-17	Spring	Cuba	La Habana	L3326779	23.1561	-82.3491	S21598534	Traveling
Ruddy Turnstone	Arenaria interpres	178	2011-03-13	Spring	Guadeloupe	Guadeloupe	L891659	16.1748	-61.1101	S8197793	CWC Area Search
Ruddy Turnstone	Arenaria interpres	170	2019-04-06	Spring	Cuba	La Habana	L8987801	23.1545	-82.3508	S54623837	Traveling
Ruddy Turnstone	Arenaria interpres	118	2012-04-17	Spring	Guadeloupe	Guadeloupe	L891659	16.1748	-61.1101	S10589680	CWC Area Search
Ruddy Turnstone	Arenaria interpres	115	2019-05-10	Spring	Bahamas	Freeport and West Grand Bahama	L791657	26.5119	-78.6489	S56111127	International Shorebird Survey (ISS)
Ruddy Turnstone	Arenaria interpres	103	2010-03-11	Spring	Guadeloupe	Guadeloupe	L891659	16.1748	-61.1101	S7584360	CWC Area Search
Ruddy Turnstone	Arenaria interpres	90	2016-03-12	Spring	Cuba	Ciego de Avila	L4409275	22.5248	-78.3372	S28484807	CWC Point Count
Ruddy Turnstone	Arenaria interpres	88	2018-04-03	Spring	Bahamas	North Abaco and Grand Cay	L1676928	26.8709	-77.5093	S44224702	Traveling
Ruddy Turnstone	Arenaria interpres	86	2018-04-09	Spring	Cuba	Ciego de Avila	L7204226	22.5247	-78.3372	S44902944	Traveling
Ruddy Turnstone	Arenaria interpres	85	2011-04-08	Spring	Cayman Islands	West Bay	L1138369	19.3495	-81.3836	S8033333	Traveling
Ruddy Turnstone	Arenaria interpres	300	2016-01-29	Winter	Jamaica	Saint Elizabeth	L4323545	17.0501	-77.7669	S27898837	Traveling
Ruddy Turnstone	Arenaria interpres	177	2011-02-15	Winter	Guadeloupe	Guadeloupe	L891659	16.1748	-61.1101	S7750219	CWC Area Search
Ruddy Turnstone	Arenaria interpres	152	2017-02-06	Winter	Cuba	Camaguey	L6001067	22.4538	-78.1354	S37718376	CWC Area Search
Ruddy Turnstone	Arenaria interpres	135	2012-02-16	Winter	Guadeloupe	Guadeloupe	L891659	16.1748	-61.1101	S13399801	CWC Area Search
Ruddy Turnstone	Arenaria interpres	127	2013-01-18	Winter	Bahamas	New Providence	L1100109	25.0714	-77.307	S13246130	CWC Area Search
Ruddy Turnstone	Arenaria interpres	105	2019-02-09	Winter	Cayman Islands	East End	L2573285	19.3313	-81.0848	S52523844	Stationary
Ruddy Turnstone	Arenaria interpres	101	2017-02-09	Winter	Cuba	Camaguey	L6001216	22.1924	-77.7733	S37719117	CWC Area Search
Ruddy Turnstone	Arenaria interpres	100	2019-01-27	Winter	Bahamas	South Abaco and Moore's Island	L1913607	26.0911	-77.5352	S52413766	Traveling
Ruddy Turnstone	Arenaria interpres	96	2019-12-07	Winter	Turks and Caicos Islands	Turks and Caicos Islands	L10258761	21.4679	-71.1445	S62108303	Traveling
Ruddy Turnstone	Arenaria interpres	95	2019-12-03	Winter	Barbados	Saint Philip	L3633238	13.127	-59.4638	S61958960	Stationary
Sanderling	Calidris alba	215	2018-11-03	Fall	Haiti	Nord-Est	L4025003	19.6906	-71.998	S49736655	Traveling
Sanderling	Calidris alba	150	2019-10-02	Fall	Puerto Rico	Camuy	L7813222	18.4882	-66.8403	S60287455	Traveling
Sanderling	Calidris alba	148	2017-11-29	Fall	Cuba	La Habana	L6876000	23.1577	-82.3456	S40810961	Traveling
Sanderling	Calidris alba	140	2010-10-17	Fall	Puerto Rico	Camuy	L1003270	18.4899	-66.8456	S7008479	Traveling
Sanderling	Calidris alba	137	2018-11-02	Fall	Cuba	La Habana	L7963791	23.1558	-82.3484	S49622630	Stationary
Sanderling	Calidris alba	124	2017-09-07	Fall	Martinique	Martinique	L6243721	14.5158	-60.8292	S39052028	CWC Point Count
Sanderling	Calidris alba	107	2018-09-16	Fall	Puerto Rico	Camuy	L1003270	18.4899	-66.8456	S48600351	Traveling
Sanderling	Calidris alba	105	2014-09-07	Fall	Martinique	Martinique	L3077054	14.541	-60.8272	S19787771	Traveling
Sanderling	Calidris alba	100	2016-10-06	Fall	Puerto Rico	Camuy	L2342758	18.4883	-66.8373	S31916798	Traveling
Sanderling	Calidris alba	96	2019-11-28	Fall	Trinidad and Tobago	Rio Claro-Mayaro	L3963095	10.3923	-61.0208	S61871863	Traveling
Sanderling	Calidris alba	180	2016-03-24	Spring	Caribbean Netherlands	Bonaire	L4432335	12.0517	-68.2717	S28615798	Traveling
Sanderling	Calidris alba	180	2019-03-09	Spring	Cuba	Ciego de Avila	L3337191	22.3742	-78.5262	S54254154	Traveling
Sanderling	Calidris alba	170	2013-03-17	Spring	Cuba	La Habana	L3326779	23.1561	-82.3491	S21598534	Traveling
Sanderling	Calidris alba	150	2019-05-06	Spring	Bahamas	Bimini	L7430416	25.7233	-79.2954	S55934666	Incidental
Sanderling	Calidris alba	102	2019-03-07	Spring	Cuba	La Habana	L8809452	23.1546	-82.35	S53596442	Traveling
Sanderling	Calidris alba	100	2015-03-15	Spring	Cuba	La Habana	L3445275	23.1459	-82.3932	S42221438	Incidental
Sanderling	Calidris alba	100	2015-03-22	Spring	Cuba	Ciego de Avila	L6676995	22.5376	-78.3591	S42221122	Incidental
Sanderling	Calidris alba	100	2018-03-04	Spring	Cuba	Ciego de Avila	L6676995	22.5376	-78.3591	S43687045	Stationary
Sanderling	Calidris alba	100	2018-04-16	Spring	Guadeloupe	Guadeloupe	L7234182	16.2535	-61.1904	S44642794	Stationary
Sanderling	Calidris alba	100	2016-04-04	Spring	Puerto Rico	Camuy	L3030254	18.4874	-66.8372	S28744793	Stationary
Sanderling	Calidris alba	450	2016-12-31	Winter	Cuba	Ciego de Avila	L3455848	22.4148	-78.417	S35122817	Stationary
Sanderling	Calidris alba	400	2017-01-20	Winter	Turks and Caicos Islands	Turks and Caicos Islands	L5282214	21.6461	-71.774	S33812473	Traveling
Sanderling	Calidris alba	399	2017-02-06	Winter	Cuba	Camaguey	L6001067	22.4538	-78.1354	S37718376	CWC Area Search
Sanderling	Calidris alba	360	2018-02-25	Winter	Cuba	Ciego de Avila	L2489391	22.5113	-78.3984	S43352778	Traveling
Sanderling	Calidris alba	300	2014-01-21	Winter	Cuba	La Habana	L2604192	23.1552	-82.3494	S16829147	CWC Point Count
Sanderling	Calidris alba	288	2015-01-14	Winter	Cuba	La Habana	L2604192	23.1552	-82.3494	S22037929	CWC Point Count
Sanderling	Calidris alba	280	2019-01-20	Winter	Turks and Caicos Islands	Turks and Caicos Islands	L8576009	21.5738	-71.5036	S52493424	CWC Traveling Count
Sanderling	Calidris alba	229	2017-01-25	Winter	Cuba	La Habana	L2604192	23.1552	-82.3494	S36532105	CWC Point Count
Sanderling	Calidris alba	225	2016-01-04	Winter	Cuba	Ciego de Avila	L4347070	22.328	-78.5006	S28030119	Stationary
Sanderling	Calidris alba	200	2019-01-17	Winter	Cuba	Ciego de Avila	L8508071	22.4337	-78.3803	S52109693	Stationary
Semipalmated Plover	Charadrius semipalmatus	350	2019-09-09	Fall	Cuba	La Habana	L8809462	23.1409	-82.3255	S59783199	Stationary
Semipalmated Plover	Charadrius semipalmatus	215	2019-10-25	Fall	Trinidad and Tobago	San Juan-Laventille	L9975405	10.623	-61.502	S60919183	CWC Traveling Count
Semipalmated Plover	Charadrius semipalmatus	128	2012-11-06	Fall	Puerto Rico	Loíza	L1372570	18.4364	-65.8764	S11978693	Stationary
Semipalmated Plover	Charadrius semipalmatus	123	2019-10-19	Fall	Dominican Republic	San Cristóbal	L2576224	18.3962	-70.0392	S60820296	Traveling
Semipalmated Plover	Charadrius semipalmatus	108	2013-11-16	Fall	Puerto Rico	Toa Baja	L2424611	18.4701	-66.1357	S15684824	Traveling
Semipalmated Plover	Charadrius semipalmatus	100	2016-10-12	Fall	Aruba	Aruba	L3304231	12.6123	-70.0428	S32053689	Stationary
Semipalmated Plover	Charadrius semipalmatus	98	2016-10-05	Fall	Guadeloupe	Guadeloupe	L4819881	16.442	-61.5235	S32011342	CWC Area Search
Semipalmated Plover	Charadrius semipalmatus	97	2019-10-22	Fall	Jamaica	Saint Andrew	L687258	17.9425	-76.7362	S60844984	Stationary
Semipalmated Plover	Charadrius semipalmatus	89	2014-10-29	Fall	Puerto Rico	Guánica	L9878933	17.9417	-66.9533	S59534189	Stationary
Semipalmated Plover	Charadrius semipalmatus	85	2014-09-06	Fall	Puerto Rico	Ceiba	L434400	18.2621	-65.6481	S19765093	Traveling
Semipalmated Plover	Charadrius semipalmatus	241	2017-03-27	Spring	Cuba	Ciego de Avila	L5625995	22.5245	-78.3375	S35492799	Traveling
Semipalmated Plover	Charadrius semipalmatus	200	2019-03-07	Spring	Dominican Republic	Samaná	L8845392	19.2168	-69.6235	S53796230	Traveling
Semipalmated Plover	Charadrius semipalmatus	180	2019-04-02	Spring	Cuba	Ciego de Avila	L8969216	22.5245	-78.3363	S55164465	Stationary
Semipalmated Plover	Charadrius semipalmatus	180	2014-04-18	Spring	Jamaica	Saint Elizabeth	L858275	17.9767	-77.8375	S17965493	CWC Area Search
Semipalmated Plover	Charadrius semipalmatus	130	2017-03-10	Spring	Cuba	Ciego de Avila	L606193	22.5636	-78.6401	S35142958	Traveling
Semipalmated Plover	Charadrius semipalmatus	130	2018-03-20	Spring	Cuba	Ciego de Avila	L7097404	22.5248	-78.3372	S43822121	Traveling
Semipalmated Plover	Charadrius semipalmatus	125	2013-03-24	Spring	Cayman Islands	Bodden Town	L793745	19.2933	-81.2288	S13503210	Stationary
Semipalmated Plover	Charadrius semipalmatus	120	2018-04-20	Spring	Cuba	Ciego de Avila	L7255015	22.5757	-78.649	S45109750	Traveling
Semipalmated Plover	Charadrius semipalmatus	120	2018-03-04	Spring	Puerto Rico	Río Grande	L5833124	18.4103	-65.8031	S43362941	Stationary
Semipalmated Plover	Charadrius semipalmatus	110	2019-04-12	Spring	Cuba	Ciego de Avila	L9064037	22.5839	-78.6548	S55060433	Stationary
Semipalmated Plover	Charadrius semipalmatus	400	2014-02-10	Winter	Cuba	Ciego de Avila	L2666131	22.5248	-78.3377	S17110490	Stationary
Semipalmated Plover	Charadrius semipalmatus	400	2012-12-12	Winter	Trinidad and Tobago	Couva-Tabaquite-Talparo	L471430	10.4811	-61.4743	S12619302	Stationary
Semipalmated Plover	Charadrius semipalmatus	360	2013-12-01	Winter	Trinidad and Tobago	San Juan-Laventille	L616318	10.5967	-61.4519	S15840192	Traveling
Semipalmated Plover	Charadrius semipalmatus	350	2012-01-14	Winter	Haiti	Ouest	L1376799	18.6388	-72.1617	S9591599	Stationary
Semipalmated Plover	Charadrius semipalmatus	305	2019-01-25	Winter	Jamaica	Saint Catherine	L3080268	17.9125	-77.0903	S52051884	CWC Point Count
Semipalmated Plover	Charadrius semipalmatus	250	2017-01-21	Winter	Turks and Caicos Islands	Turks and Caicos Islands	L5282214	21.6461	-71.774	S33839296	Traveling
Semipalmated Plover	Charadrius semipalmatus	215	2014-01-30	Winter	Cuba	Sancti Spiritus	L2746602	21.7146	-79.8332	S17685311	CWC Point Count
Semipalmated Plover	Charadrius semipalmatus	205	2018-02-02	Winter	Puerto Rico	Río Grande	L5833124	18.4103	-65.8031	S42429873	Stationary
Semipalmated Plover	Charadrius semipalmatus	201	2019-01-26	Winter	Turks and Caicos Islands	Turks and Caicos Islands	L8576012	21.8553	-71.8736	S52493458	CWC Traveling Count
Semipalmated Plover	Charadrius semipalmatus	200	2019-02-14	Winter	Cuba	Sancti Spiritus	L8634202	21.6497	-79.5479	S52807811	Stationary
Semipalmated Plover	Charadrius semipalmatus	200	2019-02-08	Winter	Puerto Rico	Cabo Rojo	L293474	17.9359	-67.192	S52493910	Traveling
Semipalmated Plover	Charadrius semipalmatus	200	2017-01-01	Winter	Trinidad and Tobago	Couva-Tabaquite-Talparo	L621489	10.484	-61.4711	S33353172	Traveling
Semipalmated Sandpiper	Calidris pusilla	3139	2013-11-19	Fall	Dominican Republic	Monte Cristi	multi, see next tab				CWC Area Search
Semipalmated Sandpiper	Calidris pusilla	1900	2010-10-14	Fall	Trinidad and Tobago	Couva-Tabaquite-Talparo	L620681	10.4628	-61.481	S8223740	Stationary
Semipalmated Sandpiper	Calidris pusilla	1500	2012-10-09	Fall	Dominican Republic	Monte Cristi	multi, see next tab				CWC Area Search
Semipalmated Sandpiper	Calidris pusilla	1250	2012-08-25	Fall	Puerto Rico	Cabo Rojo	L343336	17.9566	-67.1993	S11440103	Traveling
Semipalmated Sandpiper	Calidris pusilla	1006	2013-09-24	Fall	Saint Martin (French part)	Saint Martin (French part)	L3679169	18.095	-63.0287	S23751589	Historical
Semipalmated Sandpiper	Calidris pusilla	1000	2018-09-16	Fall	Trinidad and Tobago	Couva-Tabaquite-Talparo	L620681	10.4628	-61.481	S48555387	CWC Point Count
Semipalmated Sandpiper	Calidris pusilla	902	2013-10-09	Fall	Puerto Rico	Lajas	L1525747	17.9759	-67.0125	S15687951	Traveling
Semipalmated Sandpiper	Calidris pusilla	900	2011-09-17	Fall	Trinidad and Tobago	Couva-Tabaquite-Talparo	L620681	10.4628	-61.481	S9356369	Stationary
Semipalmated Sandpiper	Calidris pusilla	750	2013-09-19	Fall	Virgin Islands (U.S.)	Saint Croix	L302098	17.7282	-64.6573	S19620675	CWC Area Search
Semipalmated Sandpiper	Calidris pusilla	735	2016-08-22	Fall	Guadeloupe	Guadeloupe	L4822036	16.4424	-61.5326	S31202795	CWC Area Search
Semipalmated Sandpiper	Calidris pusilla	2000	2015-03-25	Spring	Puerto Rico	Cabo Rojo	L293474	17.9359	-67.192	S23155877	Traveling
Semipalmated Sandpiper	Calidris pusilla	1145	2012-03-13	Spring	Monte Cristi cumulative (see below)	Monte Cristi	multi, see next tab				CWC Area Search
Semipalmated Sandpiper	Calidris pusilla	754	2017-04-01	Spring	Puerto Rico	Cabo Rojo	L343336	17.9566	-67.1993	S35622995	Traveling
Semipalmated Sandpiper	Calidris pusilla	600	2019-03-21	Spring	Puerto Rico	Cabo Rojo	L2332801	17.9379	-67.1935	S54188281	Traveling
Semipalmated Sandpiper	Calidris pusilla	500	2019-04-11	Spring	Puerto Rico	Cabo Rojo	L293474	17.9359	-67.192	S54829452	Traveling
Semipalmated Sandpiper	Calidris pusilla	400	2016-05-08	Spring	Puerto Rico	Cabo Rojo	L293471	17.952	-67.1959	S29532951	Traveling
Semipalmated Sandpiper	Calidris pusilla	302	2019-05-14	Spring	Puerto Rico	Vieques	L9264842	18.0864	-65.5205	S56266259	Stationary
Semipalmated Sandpiper	Calidris pusilla	250	2018-04-17	Spring	Puerto Rico	Cabo Rojo	L2332801	17.9379	-67.1935	S44795455	Traveling
Semipalmated Sandpiper	Calidris pusilla	250	2016-03-23	Spring	Puerto Rico	Cabo Rojo	L323798	17.9337	-67.1922	S28548753	Traveling
Semipalmated Sandpiper	Calidris pusilla	225	2013-04-02	Spring	Puerto Rico	Cabo Rojo	L293474	17.9359	-67.192	S16039279	Stationary
Semipalmated Sandpiper	Calidris pusilla	2000	2015-01-09	Winter	Caribbean Netherlands	Bonaire	L3288877	12.0292	-68.2447	S21324576	Historical
Semipalmated Sandpiper	Calidris pusilla	1500	2014-01-31	Winter	Caribbean Netherlands	Bonaire	L2590185	12.1135	-68.2903	S16738037	Traveling
Semipalmated Sandpiper	Calidris pusilla	800	2016-02-05	Winter	Puerto Rico	Cabo Rojo	L293474	17.9359	-67.192	S27367170	Traveling
Semipalmated Sandpiper	Calidris pusilla	778	2019-01-28	Winter	Dominican Republic	Monte Cristi	multi, see next tab				CWC Area Search
Semipalmated Sandpiper	Calidris pusilla	734	2014-01-27	Winter	Dominican Republic	Monte Cristi	multi, see next tab				CWC Area Search
Semipalmated Sandpiper	Calidris pusilla	506	2018-12-22	Winter	Puerto Rico	Cabo Rojo	L2526721	17.9669	-67.1721	S50861987	Traveling
Semipalmated Sandpiper	Calidris pusilla	500	2019-02-08	Winter	Puerto Rico	Cabo Rojo	L293474	17.9359	-67.192	S52493910	Traveling
Semipalmated Sandpiper	Calidris pusilla	500	2015-01-01	Winter	Puerto Rico	Cabo Rojo	L341846	18.0392	-67.2038	S21259246	Traveling
Semipalmated Sandpiper	Calidris pusilla	500	2013-12-28	Winter	Puerto Rico	Cabo Rojo	L343336	17.9566	-67.1993	S16132463	Traveling
Semipalmated Sandpiper	Calidris pusilla	468	2016-12-17	Winter	Puerto Rico	Cabo Rojo	L1252908	17.9565	-67.1996	S33094253	Traveling
Short-billed Dowitcher	Limnodromus griseus	12000	2019-09-26	Fall	Cuba	Pinar del Rio	L10283252	22.3467	-83.2094	S62269459	Traveling
Short-billed Dowitcher	Limnodromus griseus	8937	2013-11-24	Fall	Cuba	Pinar del Rio	L2745787	22.3292	-83.2741	S17682692	CWC Area Search
Short-billed Dowitcher	Limnodromus griseus	955	2015-09-29	Fall	Bahamas	North Andros	L4346365	25.3282	-78.1372	S28026513	CWC Area Search
Short-billed Dowitcher	Limnodromus griseus	487	2012-11-24	Fall	Cuba	Pinar del Rio	L2745787	22.3292	-83.2741	S17679195	CWC Area Search
Short-billed Dowitcher	Limnodromus griseus	255	2011-09-25	Fall	Puerto Rico	Salinas	L548090	17.9498	-66.2599	S8863022	Stationary
Short-billed Dowitcher	Limnodromus griseus	250	2013-09-20	Fall	Caribbean Netherlands	Bonaire	L2361019	12.1641	-68.2826	S15215912	Stationary
Short-billed Dowitcher	Limnodromus griseus	200	2013-11-01	Fall	Bahamas	Central Abaco, Hope Town and Green Turtle Cay	L3455054	26.7658	-77.3255	S15540682	Traveling
Short-billed Dowitcher	Limnodromus griseus	200	2019-10-10	Fall	Cuba	Villa Clara	L8212109	22.7317	-79.65	S60578443	Traveling
Short-billed Dowitcher	Limnodromus griseus	200	2012-10-01	Fall	Puerto Rico	Salinas	L1766401	17.9504	-66.2626	S11698043	Traveling
Short-billed Dowitcher	Limnodromus griseus	153	2012-11-07	Fall	Puerto Rico	Cabo Rojo	L1028554	17.9995	-67.1759	S11980980	Traveling
Short-billed Dowitcher	Limnodromus griseus	2833	2013-03-15	Spring	Cuba	Pinar del Rio	L2745787	22.3292	-83.2741	S17680462	CWC Area Search
Short-billed Dowitcher	Limnodromus griseus	1000	2018-03-04	Spring	Cuba	Ciego de Avila	L3818647	22.5966	-78.6659	S43687171	Traveling
Short-billed Dowitcher	Limnodromus griseus	700	2019-03-07	Spring	Cuba	Ciego de Avila	L3818647	22.5966	-78.6659	S54032226	Stationary
Short-billed Dowitcher	Limnodromus griseus	498	2012-03-22	Spring	Cuba	Pinar del Rio	L2745787	22.3292	-83.2741	S17678591	CWC Area Search
Short-billed Dowitcher	Limnodromus griseus	450	2017-03-20	Spring	Cuba	Ciego de Avila	L3818647	22.5966	-78.6659	S42405222	Incidental
Short-billed Dowitcher	Limnodromus griseus	300	2018-03-01	Spring	Cuba	Matanzas	L3528694	22.1341	-81.2803	S48169685	Traveling
Short-billed Dowitcher	Limnodromus griseus	288	2010-03-04	Spring	Cuba	Ciego de Avila	L882970	22.504	-78.4142	S6246924	Traveling
Short-billed Dowitcher	Limnodromus griseus	240	2013-03-18	Spring	Cuba	Matanzas	L2746996	22.19	-81.02	S17765827	CWC Area Search
Short-billed Dowitcher	Limnodromus griseus	226	2016-03-21	Spring	Cuba	Matanzas	L5696648	22.1405	-80.9373	S51509741	Historical
Short-billed Dowitcher	Limnodromus griseus	220	2017-03-05	Spring	Turks and Caicos Islands	Turks and Caicos Islands	L5040187	21.7685	-72.1929	S34990213	Historical
Short-billed Dowitcher	Limnodromus griseus	14517	2014-01-30	Winter	Cuba	Pinar del Rio	L2745787	22.3292	-83.2741	S17683301	CWC Area Search
Short-billed Dowitcher	Limnodromus griseus	5000	2018-02-25	Winter	Cuba	Ciego de Avila	L7044783	22.5871	-78.6561	S43525987	Stationary
Short-billed Dowitcher	Limnodromus griseus	1985	2013-01-22	Winter	Cuba	Pinar del Rio	L2745787	22.3292	-83.2741	S17679526	CWC Area Search
Short-billed Dowitcher	Limnodromus griseus	1500	2017-01-20	Winter	Turks and Caicos Islands	Turks and Caicos Islands	L5282214	21.6461	-71.774	S33812473	Traveling
Short-billed Dowitcher	Limnodromus griseus	850	2011-02-16	Winter	Cuba	Ciego de Avila	L1128228	22.5822	-78.6537	S7975813	Incidental
Short-billed Dowitcher	Limnodromus griseus	800	2019-12-10	Winter	Cuba	Pinar del Rio	L10310683	22.3675	-83.2079	S62420595	Traveling
Short-billed Dowitcher	Limnodromus griseus	800	2017-01-06	Winter	Cuba	Ciego de Avila	L5247393	22.5716	-78.6475	S33671067	Traveling
Short-billed Dowitcher	Limnodromus griseus	770	2019-01-30	Winter	Turks and Caicos Islands	Turks and Caicos Islands	L8576020	21.6468	-71.7727	S52493437	CWC Traveling Count
Short-billed Dowitcher	Limnodromus griseus	759	2012-01-19	Winter	Cuba	Matanzas	L2616173	22.1764	-81.2384	S17608356	CWC Area Search
Short-billed Dowitcher	Limnodromus griseus	750	2012-01-25	Winter	Cuba	Matanzas	L1448801	23.1889	-81.1231	S10136665	CWC Point Count
Snowy Plover	Charadrius nivosus	41	2019-10-30	Fall	Caribbean Netherlands	Bonaire	L835715	12.2759	-68.3565	S62881065	Stationary
Snowy Plover	Charadrius nivosus	40	2015-11-19	Fall	Haiti	Nord-Est	L4016009	19.6437	-71.8147	S25942244	Traveling
Snowy Plover	Charadrius nivosus	30	2017-11-10	Fall	Puerto Rico	Carolina	L6480865	18.4384	-66.0027	S40558558	Incidental
Snowy Plover	Charadrius nivosus	29	2015-09-04	Fall	Caribbean Netherlands	Bonaire	L2633397	12.2207	-68.3755	S24887855	Traveling
Snowy Plover	Charadrius nivosus	22	2016-09-12	Fall	Dominican Republic	Monte Cristi	multi, see next tab				CWC Area Search
Snowy Plover	Charadrius nivosus	21	2013-11-03	Fall	Turks and Caicos Islands	Turks and Caicos Islands	L2403786	21.4963	-71.5258	S15571873	CWC Area Search
Snowy Plover	Charadrius nivosus	20	2019-09-14	Fall	Caribbean Netherlands	Bonaire	L2633397	12.2207	-68.3755	S59795123	Traveling
Snowy Plover	Charadrius nivosus	20	2018-10-12	Fall	Caribbean Netherlands	Bonaire	L835715	12.2759	-68.3565	S49694662	Stationary
Snowy Plover	Charadrius nivosus	20	2018-08-05	Fall	Puerto Rico	Cabo Rojo	L343336	17.9566	-67.1993	S47733249	Traveling
Snowy Plover	Charadrius nivosus	19	2015-10-02	Fall	Dominican Republic	Monte Cristi	L2457185	19.7314	-71.7111	S26506468	Traveling
Snowy Plover	Charadrius nivosus	20	2019-03-23	Spring	Puerto Rico	Ponce	L7374401	17.9692	-66.6669	S62592196	Traveling
Snowy Plover	Charadrius nivosus	19	2016-03-27	Spring	Caribbean Netherlands	Bonaire	L4429246	12.09	-68.2342	S28584113	Stationary
Snowy Plover	Charadrius nivosus	17	2012-03-22	Spring	Cuba	Pinar del Rio	L2745787	22.3292	-83.2741	S17678591	CWC Area Search
Snowy Plover	Charadrius nivosus	15	2012-03-13	Spring	Dominican Republic	Monte Cristi	L1073998	19.7757	-71.6995	S11660794	CWC Area Search
Snowy Plover	Charadrius nivosus	15	2019-04-28	Spring	Puerto Rico	Cabo Rojo	L9213209	17.9491	-67.1931	S55941343	Traveling
Snowy Plover	Charadrius nivosus	14	2016-05-14	Spring	Caribbean Netherlands	Bonaire	L4614355	12.0768	-68.2621	S29747603	Traveling
Snowy Plover	Charadrius nivosus	14	2013-03-15	Spring	Cuba	Pinar del Rio	L2745787	22.3292	-83.2741	S17680462	CWC Area Search
Snowy Plover	Charadrius nivosus	14	2019-05-04	Spring	Puerto Rico	Cabo Rojo	L343336	17.9566	-67.1993	S55773764	CWC Traveling Count
Snowy Plover	Charadrius nivosus	12	2019-05-24	Spring	Bahamas	San Salvador and Rum Cay	L9334737	24.0996	-74.4414	S56696127	Traveling
Snowy Plover	Charadrius nivosus	12	2015-05-29	Spring	Caribbean Netherlands	Bonaire	L3694266	12.058	-68.2512	S23763613	Traveling
Snowy Plover	Charadrius nivosus	12	2010-04-14	Spring	Caribbean Netherlands	Bonaire	L835715	12.2759	-68.3565	S6360166	Area
Snowy Plover	Charadrius nivosus	12	2012-03-28	Spring	Puerto Rico	Lajas	L1479271	17.9564	-67.0903	S10347774	Traveling
Snowy Plover	Charadrius nivosus	33	2014-01-30	Winter	Cuba	Pinar del Rio	L2745787	22.3292	-83.2741	S17683301	CWC Area Search
Snowy Plover	Charadrius nivosus	33	2012-12-30	Winter	Puerto Rico	Cabo Rojo	L1243442	17.9631	-67.1863	S12474077	Stationary
Snowy Plover	Charadrius nivosus	27	2011-01-31	Winter	Puerto Rico	Cabo Rojo	L1086550	17.9613	-67.1959	S7569641	Incidental
Snowy Plover	Charadrius nivosus	21	2015-12-16	Winter	Cuba	Matanzas	L5783732	23.0637	-80.7789	S40939533	CWC Point Count
Snowy Plover	Charadrius nivosus	20	2014-12-27	Winter	Puerto Rico	Cabo Rojo	L1252908	17.9565	-67.1996	S21059175	Traveling
Snowy Plover	Charadrius nivosus	17	2018-01-07	Winter	Puerto Rico	Cabo Rojo	L1252908	17.9565	-67.1996	S43353381	Traveling
Snowy Plover	Charadrius nivosus	17	2013-12-02	Winter	Puerto Rico	Cabo Rojo	L343336	17.9566	-67.1993	S15840449	Stationary
Snowy Plover	Charadrius nivosus	14	2016-02-09	Winter	Caribbean Netherlands	Bonaire	L3288877	12.0292	-68.2447	S27403124	Traveling
Snowy Plover	Charadrius nivosus	13	2013-01-14	Winter	Caribbean Netherlands	Bonaire	L835715	12.2759	-68.3565	S12642015	CWC Point Count
Snowy Plover	Charadrius nivosus	13	2019-02-09	Winter	Puerto Rico	Cabo Rojo	L343336	17.9566	-67.1993	S52536534	Traveling
Solitary Sandpiper	Tringa solitaria	16	2010-08-10	Fall	Bahamas	Freeport and West Grand Bahama	L792830	26.5707	-78.6394	S6755728	Traveling
Solitary Sandpiper	Tringa solitaria	16	2015-10-12	Fall	Trinidad and Tobago	Tunapuna-Piarco	L621687	10.6394	-61.241	S25458958	Traveling
Solitary Sandpiper	Tringa solitaria	13	2016-08-02	Fall	Barbados	Saint Philip	L2513016	13.158	-59.4502	S30945656	Stationary
Solitary Sandpiper	Tringa solitaria	12	2015-09-07	Fall	Bahamas	Freeport and West Grand Bahama	L813455	26.5656	-78.6656	S24945604	Traveling
Solitary Sandpiper	Tringa solitaria	12	2019-10-04	Fall	Puerto Rico	Manati	L323780	18.4677	-66.5241	S60331100	Traveling
Solitary Sandpiper	Tringa solitaria	11	2019-10-22	Fall	Barbados	Saint Lucy	L4025466	13.295	-59.6341	S60848955	Traveling
Solitary Sandpiper	Tringa solitaria	11	2014-10-24	Fall	Virgin Islands (U.S.)	Saint Thomas	L289237	18.3517	-64.9957	S20626478	CWC Point Count
Solitary Sandpiper	Tringa solitaria	10	2015-09-06	Fall	Barbados	Saint Philip	L2364456	13.1579	-59.4508	S25023949	Stationary
Solitary Sandpiper	Tringa solitaria	10	2010-08-18	Fall	Puerto Rico	Cabo Rojo	L986749	18.0166	-67.1515	S6828359	Stationary
Solitary Sandpiper	Tringa solitaria	10	2019-10-25	Fall	Trinidad and Tobago	San Juan-Laventille	L616318	10.5967	-61.4519	S61744992	Traveling
Solitary Sandpiper	Tringa solitaria	10	2013-10-07	Fall	Turks and Caicos Islands	Turks and Caicos Islands	L1466045	21.803	-72.1578	S17722439	Area
Solitary Sandpiper	Tringa solitaria	100	2018-04-14	Spring	Puerto Rico	Cabo Rojo	L7306798	17.9335	-67.1922	S52632103	Stationary
Solitary Sandpiper	Tringa solitaria	20	2015-05-01	Spring	Bahamas	North Abaco and Grand Cay	L499654	26.6941	-77.3194	S23172958	Traveling
Solitary Sandpiper	Tringa solitaria	12	2016-04-20	Spring	Jamaica	Westmoreland	L858268	18.2932	-78.3164	S29092238	Traveling
Solitary Sandpiper	Tringa solitaria	12	2018-04-15	Spring	Puerto Rico	Guánica	L8599484	17.9709	-66.8687	S52631656	Stationary
Solitary Sandpiper	Tringa solitaria	11	2015-04-28	Spring	Bahamas	Freeport and West Grand Bahama	L687541	26.5445	-78.6848	S23113510	Traveling
Solitary Sandpiper	Tringa solitaria	11	2018-04-25	Spring	Bahamas	Freeport and West Grand Bahama	L813455	26.5656	-78.6656	S44949585	International Shorebird Survey (ISS)
Solitary Sandpiper	Tringa solitaria	10	2018-04-16	Spring	Bahamas	Freeport and West Grand Bahama	L687602	26.5116	-78.7015	S44651719	International Shorebird Survey (ISS)
Solitary Sandpiper	Tringa solitaria	10	2019-04-18	Spring	Guadeloupe	Guadeloupe	L1467534	16.2714	-61.5235	S55101480	Stationary
Solitary Sandpiper	Tringa solitaria	9	2016-04-19	Spring	Bahamas	Freeport and West Grand Bahama	L687541	26.5445	-78.6848	S29068819	Traveling
Solitary Sandpiper	Tringa solitaria	9	2019-05-04	Spring	Curacao	Curacao	L4601307	12.139	-68.9822	S55820094	Traveling
Solitary Sandpiper	Tringa solitaria	20	2015-02-21	Winter	Caribbean Netherlands	Bonaire	L3382629	12.1254	-68.2308	S22013124	Traveling
Solitary Sandpiper	Tringa solitaria	16	2019-02-17	Winter	Trinidad and Tobago	Tunapuna-Piarco	L8637355	10.6266	-61.3561	S52822720	Traveling
Solitary Sandpiper	Tringa solitaria	14	2013-12-08	Winter	Trinidad and Tobago	Tunapuna-Piarco	L621687	10.6394	-61.241	S15903352	Traveling
Solitary Sandpiper	Tringa solitaria	10	2018-01-01	Winter	Trinidad and Tobago	San Juan-Laventille	L616318	10.5967	-61.4519	S41524224	Traveling
Solitary Sandpiper	Tringa solitaria	10	2010-01-30	Winter	Trinidad and Tobago	Western Tobago	L674478	11.1535	-60.7816	S6306034	Traveling
Solitary Sandpiper	Tringa solitaria	9	2014-01-24	Winter	Trinidad and Tobago	Western Tobago	L2582083	11.1634	-60.8283	S16504735	CWC Point Count
Solitary Sandpiper	Tringa solitaria	8	2012-12-21	Winter	Cuba	Santiago de Cuba	L1855507	19.8888	-75.48	S12434379	Traveling
Solitary Sandpiper	Tringa solitaria	8	2014-12-18	Winter	Sint Maarten	Sint Maarten	L3247792	18.0455	-63.1254	S21082737	Traveling
Solitary Sandpiper	Tringa solitaria	8	2010-12-11	Winter	Trinidad and Tobago	Tunapuna-Piarco	L621687	10.6394	-61.241	S8537147	Traveling
Solitary Sandpiper	Tringa solitaria	8	2015-12-10	Winter	Trinidad and Tobago	Tunapuna-Piarco	L621687	10.6394	-61.241	S26338989	Traveling
Solitary Sandpiper	Tringa solitaria	8	2016-01-14	Winter	Trinidad and Tobago	Western Tobago	L623632	11.1621	-60.8301	S27196845	Stationary
Solitary Sandpiper	Tringa solitaria	8	2016-01-08	Winter	Trinidad and Tobago	Sangre Grande	L652732	10.5923	-61.2006	S26978555	Traveling
Spotted Sandpiper	Actitis macularius	105	2018-10-06	Fall	Trinidad and Tobago	San Juan-Laventille	L616318	10.5967	-61.4519	S49055616	Traveling
Spotted Sandpiper	Actitis macularius	100	2019-08-15	Fall	Saint Vincent and the Grenadines	Grenadines	L3963133	12.6353	-61.3952	S59007382	Traveling
Spotted Sandpiper	Actitis macularius	100	2016-10-28	Fall	Trinidad and Tobago	San Juan-Laventille	L616318	10.5967	-61.4519	S32406430	Traveling
Spotted Sandpiper	Actitis macularius	100	2019-09-12	Fall	Trinidad and Tobago	San Juan-Laventille	L616318	10.5967	-61.4519	S59721988	Traveling
Spotted Sandpiper	Actitis macularius	60	2015-10-10	Fall	Trinidad and Tobago	San Juan-Laventille	L616318	10.5967	-61.4519	S60338177	Traveling
Spotted Sandpiper	Actitis macularius	60	2017-11-07	Fall	Trinidad and Tobago	San Juan-Laventille	L616318	10.5967	-61.4519	S50939400	Traveling
Spotted Sandpiper	Actitis macularius	60	2019-10-24	Fall	Trinidad and Tobago	San Juan-Laventille	L616318	10.5967	-61.4519	S60926296	Traveling
Spotted Sandpiper	Actitis macularius	50	2019-08-27	Fall	Haiti	Sud	L9791615	18.2936	-73.7668	S60628484	CWC Area Search
Spotted Sandpiper	Actitis macularius	50	2017-08-04	Fall	Trinidad and Tobago	Couva-Tabaquite-Talparo	L5267657	10.4884	-61.4718	S38498842	Stationary
Spotted Sandpiper	Actitis macularius	43	2012-08-01	Fall	Saint Martin (French part)	Saint Martin (French part)	L3679169	18.095	-63.0287	S23762587	Historical
Spotted Sandpiper	Actitis macularius	100	2014-04-24	Spring	Haiti	Sud	L2955333	18.0869	-73.6567	S19044288	Traveling
Spotted Sandpiper	Actitis macularius	64	2015-04-05	Spring	Haiti	Ouest	L352517	18.6394	-72.1457	S27006390	Traveling
Spotted Sandpiper	Actitis macularius	50	2012-05-03	Spring	Trinidad and Tobago	San Juan-Laventille	L616318	10.5967	-61.4519	S30568530	Incidental
Spotted Sandpiper	Actitis macularius	43	2018-03-11	Spring	Trinidad and Tobago	San Juan-Laventille	L616318	10.5967	-61.4519	S43847779	Traveling
Spotted Sandpiper	Actitis macularius	42	2017-03-13	Spring	Trinidad and Tobago	San Juan-Laventille	L616318	10.5967	-61.4519	S35165458	Traveling
Spotted Sandpiper	Actitis macularius	30	2010-03-05	Spring	Trinidad and Tobago	San Juan-Laventille	L616318	10.5967	-61.4519	S6089058	Traveling
Spotted Sandpiper	Actitis macularius	30	2016-03-08	Spring	Trinidad and Tobago	San Juan-Laventille	L616318	10.5967	-61.4519	S28053618	Traveling
Spotted Sandpiper	Actitis macularius	25	2015-04-02	Spring	Trinidad and Tobago	San Juan-Laventille	L616318	10.5967	-61.4519	S32105409	Traveling
Spotted Sandpiper	Actitis macularius	23	2019-03-29	Spring	Haiti	Sud	L8579999	18.3072	-73.8273	S58302131	CWC Area Search
Spotted Sandpiper	Actitis macularius	20	2014-03-23	Spring	Grenada	Saint George	L1262915	12.0163	-61.7392	S17571022	Stationary
Spotted Sandpiper	Actitis macularius	20	2016-03-23	Spring	Jamaica	Saint Catherine	L4417343	17.9987	-76.8649	S28511381	Historical
Spotted Sandpiper	Actitis macularius	150	2018-01-09	Winter	Trinidad and Tobago	San Juan-Laventille	L616318	10.5967	-61.4519	S41785699	Traveling
Spotted Sandpiper	Actitis macularius	100	2013-12-03	Winter	Trinidad and Tobago	San Juan-Laventille	L616318	10.5967	-61.4519	S15935025	Traveling
Spotted Sandpiper	Actitis macularius	65	2019-01-02	Winter	Trinidad and Tobago	San Juan-Laventille	L616318	10.5967	-61.4519	S51245169	Traveling
Spotted Sandpiper	Actitis macularius	55	2016-02-17	Winter	Trinidad and Tobago	San Juan-Laventille	L616318	10.5967	-61.4519	S28573812	Traveling
Spotted Sandpiper	Actitis macularius	53	2013-01-24	Winter	Haiti	Ouest	L1376799	18.6388	-72.1617	S12748651	Traveling
Spotted Sandpiper	Actitis macularius	45	2015-02-28	Winter	Haiti	Ouest	L352517	18.6394	-72.1457	S27000217	Traveling
Spotted Sandpiper	Actitis macularius	45	2013-02-24	Winter	Saint Vincent and the Grenadines	Grenadines	L1916377	12.6022	-61.4232	S13169821	Area
Spotted Sandpiper	Actitis macularius	31	2017-02-03	Winter	Grenada	Saint George	L1262915	12.0163	-61.7392	S34189768	Stationary
Spotted Sandpiper	Actitis macularius	28	2012-01-14	Winter	Haiti	Ouest	L1376799	18.6388	-72.1617	S9591599	Stationary
Spotted Sandpiper	Actitis macularius	25	2012-01-31	Winter	Trinidad and Tobago	San Juan-Laventille	L936771	10.5999	-61.4215	S9746735	Traveling
Spotted Sandpiper	Actitis macularius	25	2017-12-24	Winter	Trinidad and Tobago	San Juan-Laventille	L616318	10.5967	-61.4519	S41294579	Traveling
Stilt Sandpiper	Calidris himantopus	2213	2013-11-20	Fall	Dominican Republic	Monte Cristi	multi, see next tab				CWC Area Search
Stilt Sandpiper	Calidris himantopus	959	2013-10-09	Fall	Puerto Rico	Lajas	L1525747	17.9759	-67.0125	S15687951	Traveling
Stilt Sandpiper	Calidris himantopus	800	2010-08-19	Fall	Puerto Rico	Lajas	L323820	17.9734	-67.0041	S6785353	Traveling
Stilt Sandpiper	Calidris himantopus	643	2015-08-10	Fall	Puerto Rico	Cabo Rojo	L343336	17.9566	-67.1993	S31147091	Traveling
Stilt Sandpiper	Calidris himantopus	636	2015-10-02	Fall	Dominican Republic	Monte Cristi	multi, see next tab				Traveling
Stilt Sandpiper	Calidris himantopus	600	2018-08-05	Fall	Puerto Rico	Cabo Rojo	L343336	17.9566	-67.1993	S47733249	Traveling
Stilt Sandpiper	Calidris himantopus	596	2014-09-06	Fall	Puerto Rico	Cabo Rojo	L3073920	17.9546	-67.2024	S19781054	Traveling
Stilt Sandpiper	Calidris himantopus	575	2012-09-04	Fall	Virgin Islands (U.S.)	Saint Croix	L302098	17.7282	-64.6573	S11515836	Traveling
Stilt Sandpiper	Calidris himantopus	519	2012-11-07	Fall	Puerto Rico	Cabo Rojo	L1028554	17.9995	-67.1759	S11980980	Traveling
Stilt Sandpiper	Calidris himantopus	400	2011-08-17	Fall	Puerto Rico	Cabo Rojo	L293471	17.952	-67.1959	S8704122	Traveling
Stilt Sandpiper	Calidris himantopus	550	2015-03-04	Spring	Puerto Rico	Vieques	L2744698	18.1021	-65.4578	S23764998	CWC Area Search
Stilt Sandpiper	Calidris himantopus	500	2017-03-23	Spring	Puerto Rico	Cabo Rojo	L293474	17.9359	-67.192	S35379939	Traveling
Stilt Sandpiper	Calidris himantopus	500	2019-03-20	Spring	Puerto Rico	Cabo Rojo	L293474	17.9359	-67.192	S54048223	Traveling
Stilt Sandpiper	Calidris himantopus	313	2019-03-13	Spring	Puerto Rico	Vieques	L8592568	18.0902	-65.5126	S54046226	Stationary
Stilt Sandpiper	Calidris himantopus	300	2015-03-25	Spring	Puerto Rico	Cabo Rojo	L293474	17.9359	-67.192	S23155877	Traveling
Stilt Sandpiper	Calidris himantopus	287	2013-03-19	Spring	Dominican Republic	Monte Cristi	multi, see next tab				CWC Area Search
Stilt Sandpiper	Calidris himantopus	260	2019-03-24	Spring	Dominican Republic	Peravia	L8911265	18.2135	-70.5511	S54185680	Stationary
Stilt Sandpiper	Calidris himantopus	258	2012-03-15	Spring	Guadeloupe	Guadeloupe	L891659	16.1748	-61.1101	S13399823	CWC Area Search
Stilt Sandpiper	Calidris himantopus	250	2012-03-04	Spring	Haiti	Sud	L1441699	18.2075	-73.7411	S10081587	Traveling
Stilt Sandpiper	Calidris himantopus	250	2016-03-29	Spring	Puerto Rico	Cabo Rojo	L343336	17.9566	-67.1993	S29647336	Traveling
Stilt Sandpiper	Calidris himantopus	250	2018-03-27	Spring	Virgin Islands (U.S.)	Saint Croix	L5123717	17.7025	-64.7615	S44004796	Traveling
Stilt Sandpiper	Calidris himantopus	1100	2012-01-28	Winter	Puerto Rico	Cabo Rojo	L1300344	17.958	-67.206	S9714649	Traveling
Stilt Sandpiper	Calidris himantopus	1061	2019-01-29	Winter	Dominican Republic	Monte Cristi	multi, see next tab				CWC Area Search
Stilt Sandpiper	Calidris himantopus	817	2016-12-17	Winter	Puerto Rico	Cabo Rojo	L1252908	17.9565	-67.1996	S33094253	Traveling
Stilt Sandpiper	Calidris himantopus	800	2015-02-02	Winter	Puerto Rico	Cabo Rojo	L1090093	17.9757	-67.2116	S21709419	CWC Point Count
Stilt Sandpiper	Calidris himantopus	800	2012-01-29	Winter	Puerto Rico	Cabo Rojo	L293471	17.952	-67.1959	S9739302	Traveling
Stilt Sandpiper	Calidris himantopus	645	2012-12-16	Winter	Virgin Islands (U.S.)	Saint Croix	L302098	17.7282	-64.6573	S13566917	Traveling
Stilt Sandpiper	Calidris himantopus	622	2016-02-07	Winter	Dominican Republic	Peravia	L352478	18.2096	-70.537	S31313176	Traveling
Stilt Sandpiper	Calidris himantopus	600	2017-02-02	Winter	Puerto Rico	Guayama	L353004	17.9428	-66.1758	S34108006	Stationary
Stilt Sandpiper	Calidris himantopus	567	2015-02-25	Winter	Dominican Republic	Monte Cristi	multi, see next tab				CWC Area Search
Stilt Sandpiper	Calidris himantopus	500	2015-01-03	Winter	Puerto Rico	Vieques	L3270511	18.0994	-65.457	S21220629	Traveling
Upland Sandpiper	Bartramia longicauda	21	2013-09-21	Fall	Barbados	Christ Church	L2357645	13.0745	-59.4937	S15242069	Traveling
Upland Sandpiper	Bartramia longicauda	6	2011-09-20	Fall	Puerto Rico	Fajardo	L382267	18.3238	-65.652	S8836975	Traveling
Upland Sandpiper	Bartramia longicauda	5	2016-08-29	Fall	Barbados	Saint Philip	L3633238	13.127	-59.4638	S31309684	Stationary
Upland Sandpiper	Bartramia longicauda	5	2015-09-13	Fall	Guadeloupe	Guadeloupe	L2365516	16.2636	-61.5197	S25016783	Stationary
Upland Sandpiper	Bartramia longicauda	5	2016-08-26	Fall	Guadeloupe	Guadeloupe	L2365516	16.2636	-61.5197	S31256901	CWC Point Count
Upland Sandpiper	Bartramia longicauda	5	2011-09-20	Fall	Puerto Rico	Manati	L323780	18.4677	-66.5241	S8871780	Stationary
Upland Sandpiper	Bartramia longicauda	4	2013-10-04	Fall	Puerto Rico	Aguadilla	L1297067	18.4665	-67.111	S17258437	Incidental
Upland Sandpiper	Bartramia longicauda	4	2016-08-25	Fall	Puerto Rico	Toa Baja	L4879473	18.4494	-66.2433	S31251424	Traveling
Upland Sandpiper	Bartramia longicauda	3	2010-09-04	Fall	Bahamas	Freeport and West Grand Bahama	L791657	26.5119	-78.6489	S6842130	Traveling
Upland Sandpiper	Bartramia longicauda	3	2015-09-08	Fall	Barbados	Christ Church	L2357645	13.0745	-59.4937	S25026054	Traveling
Upland Sandpiper	Bartramia longicauda	3	2018-08-28	Fall	Barbados	Saint Philip	L3633238	13.127	-59.4638	S48125378	Stationary
Upland Sandpiper	Bartramia longicauda	3	2019-10-18	Fall	Curacao	Curacao	L7805278	12.1882	-68.9345	S60711814	Traveling
Upland Sandpiper	Bartramia longicauda	3	2013-09-05	Fall	Puerto Rico	Toa Baja	L1768578	18.4501	-66.2417	S15103551	Traveling
Upland Sandpiper	Bartramia longicauda	20	2012-04-22	Spring	Cuba	Matanzas	L1787156	22.0667	-81.0325	S11869388	Traveling
Upland Sandpiper	Bartramia longicauda	5	2012-04-28	Spring	Bahamas	Freeport and West Grand Bahama	L791662	26.6939	-78.9745	S10898851	Traveling
Upland Sandpiper	Bartramia longicauda	2	2016-05-07	Spring	Bahamas	Freeport and West Grand Bahama	L791662	26.6939	-78.9745	S29475699	Traveling
Upland Sandpiper	Bartramia longicauda	2	2017-04-26	Spring	Cayman Islands	West Bay	L598246	19.3427	-81.3707	S36310883	Incidental
Western Sandpiper	Calidris mauri	2600	2019-10-10	Fall	Cuba	Villa Clara	L8212109	22.7317	-79.65	S60578443	Traveling
Western Sandpiper	Calidris mauri	500	2010-08-23	Fall	Trinidad and Tobago	Couva-Tabaquite-Talparo	L620681	10.4628	-61.481	S6982574	Stationary
Western Sandpiper	Calidris mauri	315	2015-09-29	Fall	Bahamas	North Andros	L4346365	25.3282	-78.1372	S28026513	CWC Area Search
Western Sandpiper	Calidris mauri	300	2017-11-16	Fall	Cuba	Sancti Spiritus	L6478364	21.7627	-80.011	S40723627	Traveling
Western Sandpiper	Calidris mauri	300	2013-08-29	Fall	Trinidad and Tobago	Couva-Tabaquite-Talparo	L620681	10.4628	-61.481	S15041555	Stationary
Western Sandpiper	Calidris mauri	250	2018-08-27	Fall	Trinidad and Tobago	Couva-Tabaquite-Talparo	L620681	10.4628	-61.481	S48132406	Stationary
Western Sandpiper	Calidris mauri	154	2013-11-19	Fall	Dominican Republic	Monte Cristi	multi, see next tab				CWC Area Search
Western Sandpiper	Calidris mauri	150	2014-08-23	Fall	Trinidad and Tobago	San Juan-Laventille	L936771	10.5999	-61.4215	S19553475	Traveling
Western Sandpiper	Calidris mauri	140	2018-08-24	Fall	Cuba	Matanzas	L7893304	22.356	-80.9815	S48285630	Traveling
Western Sandpiper	Calidris mauri	110	2017-11-16	Fall	Cuba	Sancti Spiritus	L6491138	21.7622	-80.0102	S40625429	Traveling
Western Sandpiper	Calidris mauri	180	2016-03-25	Spring	Trinidad and Tobago	Couva-Tabaquite-Talparo	L621489	10.484	-61.4711	S28532949	Stationary
Western Sandpiper	Calidris mauri	150	2017-04-03	Spring	Trinidad and Tobago	Couva-Tabaquite-Talparo	L621489	10.484	-61.4711	S35668336	Stationary
Western Sandpiper	Calidris mauri	100	2016-03-18	Spring	Cuba	Matanzas	L3528694	22.1341	-81.2803	S29050376	Traveling
Western Sandpiper	Calidris mauri	100	2018-03-28	Spring	Trinidad and Tobago	Couva-Tabaquite-Talparo	L621489	10.484	-61.4711	S44039546	Stationary
Western Sandpiper	Calidris mauri	50	2019-04-10	Spring	Jamaica	Clarendon	L895643	17.7559	-77.1881	S54958952	Traveling
Western Sandpiper	Calidris mauri	45	2018-04-15	Spring	Trinidad and Tobago	Couva-Tabaquite-Talparo	L620681	10.4628	-61.481	S44614472	Stationary
Western Sandpiper	Calidris mauri	34	2014-04-27	Spring	Turks and Caicos Islands	Turks and Caicos Islands	L2411133	21.5003	-71.5282	S18101782	CWC Area Search
Western Sandpiper	Calidris mauri	31	2012-03-22	Spring	Cuba	Pinar del Rio	L2745787	22.3292	-83.2741	S17678591	CWC Area Search
Western Sandpiper	Calidris mauri	31	2019-04-02	Spring	Cuba	Ciego de Avila	L8969216	22.5245	-78.3363	S55164465	Stationary
Western Sandpiper	Calidris mauri	30	2018-03-29	Spring	Bahamas	Inagua	L7139194	21.013	-73.6635	S44068642	Traveling
Western Sandpiper	Calidris mauri	30	2016-05-14	Spring	Bahamas	Freeport and West Grand Bahama	L791662	26.6939	-78.9745	S29662709	Traveling
Western Sandpiper	Calidris mauri	30	2017-04-01	Spring	Turks and Caicos Islands	Turks and Caicos Islands	L5273192	21.4947	-71.5243	S35614467	Traveling
Western Sandpiper	Calidris mauri	550	2011-01-31	Winter	Bahamas	Inagua	L1101962	20.9922	-73.595	S7747577	CWC Point Count
Western Sandpiper	Calidris mauri	397	2017-01-21	Winter	Turks and Caicos Islands	Turks and Caicos Islands	L5282214	21.6461	-71.774	S33839296	Traveling
Western Sandpiper	Calidris mauri	200	2015-02-04	Winter	Trinidad and Tobago	Couva-Tabaquite-Talparo	L3340688	10.4884	-61.4712	S23173280	Stationary
Western Sandpiper	Calidris mauri	200	2011-12-03	Winter	Trinidad and Tobago	Couva-Tabaquite-Talparo	L620681	10.4628	-61.481	S9363740	Stationary
Western Sandpiper	Calidris mauri	200	2019-02-21	Winter	Trinidad and Tobago	Couva-Tabaquite-Talparo	L620681	10.4628	-61.481	S53013591	Stationary
Western Sandpiper	Calidris mauri	180	2017-01-17	Winter	Turks and Caicos Islands	Turks and Caicos Islands	L5273172	21.6114	-71.4998	S33746636	Traveling
Western Sandpiper	Calidris mauri	160	2019-01-10	Winter	Bahamas	Inagua	L8404963	21.1067	-73.6053	S51540520	Traveling
Western Sandpiper	Calidris mauri	150	2016-02-17	Winter	Trinidad and Tobago	Couva-Tabaquite-Talparo	L4302378	10.4884	-61.4712	S27657866	Stationary
Western Sandpiper	Calidris mauri	150	2017-01-09	Winter	Trinidad and Tobago	Couva-Tabaquite-Talparo	L621489	10.484	-61.4711	S33563491	Stationary
Western Sandpiper	Calidris mauri	104	2014-01-28	Winter	Dominican Republic	Monte Cristi	multi, see next tab				CWC Area Search
Whimbrel	Numenius phaeopus	60	2011-08-05	Fall	Trinidad and Tobago	Couva-Tabaquite-Talparo	L620681	10.4628	-61.481	S9356055	Stationary
Whimbrel	Numenius phaeopus	49	2011-11-13	Fall	Puerto Rico	Guayama	L353004	17.9428	-66.1758	S9179541	Traveling
Whimbrel	Numenius phaeopus	40	2010-11-30	Fall	Trinidad and Tobago	Couva-Tabaquite-Talparo	L471430	10.4811	-61.4743	S8347662	Stationary
Whimbrel	Numenius phaeopus	40	2019-09-21	Fall	Trinidad and Tobago	Couva-Tabaquite-Talparo	L620681	10.4628	-61.481	S59991199	CWC Point Count
Whimbrel	Numenius phaeopus	40	2010-08-27	Fall	Trinidad and Tobago	Couva-Tabaquite-Talparo	L620681	10.4628	-61.481	S6982575	Stationary
Whimbrel	Numenius phaeopus	35	2014-10-23	Fall	Trinidad and Tobago	Couva-Tabaquite-Talparo	L621489	10.484	-61.4711	S20314064	Stationary
Whimbrel	Numenius phaeopus	32	2012-08-05	Fall	Puerto Rico	Santa Isabel	L1650521	17.9513	-66.3838	S11309593	Stationary
Whimbrel	Numenius phaeopus	23	2018-09-08	Fall	Puerto Rico	Ceiba	L6846459	18.2405	-65.6073	S48425955	Traveling
Whimbrel	Numenius phaeopus	22	2013-09-06	Fall	Puerto Rico	Barceloneta	L682838	18.4809	-66.5343	S15111360	Incidental
Whimbrel	Numenius phaeopus	22	2017-10-12	Fall	Saint Vincent and the Grenadines	Grenadines	L1291557	12.5921	-61.4342	S39861922	CWC Area Search
Whimbrel	Numenius phaeopus	80	2019-04-10	Spring	Jamaica	Clarendon	L895643	17.7559	-77.1881	S54985410	Traveling
Whimbrel	Numenius phaeopus	50	2018-03-10	Spring	Puerto Rico	Ceiba	L6846459	18.2405	-65.6073	S43587525	Traveling
Whimbrel	Numenius phaeopus	35	2016-04-15	Spring	Cuba	Matanzas	L3528694	22.1341	-81.2803	S42958375	Stationary
Whimbrel	Numenius phaeopus	35	2011-04-08	Spring	Trinidad and Tobago	Couva-Tabaquite-Talparo	L620681	10.4628	-61.481	S8558651	Stationary
Whimbrel	Numenius phaeopus	30	2014-03-09	Spring	Puerto Rico	Salinas	L2707942	17.9366	-66.2549	S17407447	Stationary
Whimbrel	Numenius phaeopus	23	2012-03-11	Spring	Aruba	Aruba	L1450115	12.5864	-70.0428	S10145959	Stationary
Whimbrel	Numenius phaeopus	18	2017-03-15	Spring	Aruba	Aruba	L5615818	12.5603	-70.0518	S35483954	Traveling
Whimbrel	Numenius phaeopus	18	2016-04-07	Spring	Cuba	Matanzas	L8213402	22.2796	-81.2139	S50411380	Incidental
Whimbrel	Numenius phaeopus	15	2015-03-18	Spring	Aruba	Aruba	L2043464	12.5857	-70.0428	S22449017	Stationary
Whimbrel	Numenius phaeopus	14	2017-03-10	Spring	Aruba	Aruba	L856498	12.5615	-70.0483	S35094002	Traveling
Whimbrel	Numenius phaeopus	14	2012-04-21	Spring	Cuba	Matanzas	L1787156	22.0667	-81.0325	S11869300	Traveling
Whimbrel	Numenius phaeopus	14	2019-05-04	Spring	Trinidad and Tobago	Couva-Tabaquite-Talparo	L7109358	10.4399	-61.4794	S55816694	Stationary
Whimbrel	Numenius phaeopus	75	2010-02-04	Winter	Trinidad and Tobago	Couva-Tabaquite-Talparo	L471430	10.4811	-61.4743	S6301561	Stationary
Whimbrel	Numenius phaeopus	35	2016-01-16	Winter	Aruba	Aruba	L2043464	12.5857	-70.0428	S26925050	Traveling
Whimbrel	Numenius phaeopus	35	2011-12-11	Winter	Puerto Rico	Santa Isabel	L360553	17.9584	-66.3634	S9343410	Traveling
Whimbrel	Numenius phaeopus	30	2015-12-29	Winter	Puerto Rico	Guayama	L353004	17.9428	-66.1758	S51381363	Stationary
Whimbrel	Numenius phaeopus	30	2011-02-19	Winter	Trinidad and Tobago	Couva-Tabaquite-Talparo	L620681	10.4628	-61.481	S8546806	Stationary
Whimbrel	Numenius phaeopus	30	2019-01-30	Winter	Trinidad and Tobago	Couva-Tabaquite-Talparo	L620681	10.4628	-61.481	S52216729	CWC Area Search
Whimbrel	Numenius phaeopus	28	2017-02-20	Winter	Aruba	Aruba	L856498	12.5615	-70.0483	S34569358	Traveling
Whimbrel	Numenius phaeopus	23	2013-02-05	Winter	Saint Vincent and the Grenadines	Grenadines	L1916377	12.6022	-61.4232	S12890222	CWC Area Search
Whimbrel	Numenius phaeopus	18	2014-12-30	Winter	Saint Vincent and the Grenadines	Grenadines	L1291557	12.5921	-61.4342	S21082833	CWC Point Count
Whimbrel	Numenius phaeopus	16	2019-01-12	Winter	Aruba	Aruba	L2043464	12.5857	-70.0428	S51612675	Stationary
White-rumped Sandpiper	Calidris fuscicollis	560	2012-08-25	Fall	Puerto Rico	Cabo Rojo	L343336	17.9566	-67.1993	S11440103	Traveling
White-rumped Sandpiper	Calidris fuscicollis	240	2018-09-14	Fall	Barbados	Christ Church	L3904790	13.0544	-59.5028	S48501714	Traveling
White-rumped Sandpiper	Calidris fuscicollis	170	2011-09-15	Fall	Puerto Rico	Toa Baja	L616056	18.4477	-66.2468	S8817892	Stationary
White-rumped Sandpiper	Calidris fuscicollis	130	2018-09-13	Fall	Barbados	Saint Lucy	L4025466	13.295	-59.6341	S48484447	Traveling
White-rumped Sandpiper	Calidris fuscicollis	126	2019-09-13	Fall	Barbados	Saint Lucy	L4025466	13.295	-59.6341	S59736463	Stationary
White-rumped Sandpiper	Calidris fuscicollis	107	2016-09-28	Fall	Guadeloupe	Guadeloupe	L4819881	16.442	-61.5235	S31798499	CWC Area Search
White-rumped Sandpiper	Calidris fuscicollis	100	2014-09-21	Fall	Puerto Rico	Lajas	L364725	18.0117	-67.1013	S20228440	Traveling
White-rumped Sandpiper	Calidris fuscicollis	100	2018-09-15	Fall	Trinidad and Tobago	Tunapuna-Piarco	L621491	10.5989	-61.4007	S48527846	CWC Traveling Count
White-rumped Sandpiper	Calidris fuscicollis	92	2017-09-06	Fall	Barbados	Christ Church	L1133547	13.1018	-59.499	S39052095	Traveling
White-rumped Sandpiper	Calidris fuscicollis	80	2011-09-16	Fall	Puerto Rico	Barceloneta	L682838	18.4809	-66.5343	S9013920	Incidental
White-rumped Sandpiper	Calidris fuscicollis	485	2013-05-09	Spring	Cayman Islands	East End	L884962	19.3365	-81.0862	S14146794	Traveling
White-rumped Sandpiper	Calidris fuscicollis	450	2013-05-09	Spring	Cayman Islands	North Side	L1061301	19.3474	-81.2082	S14146850	Stationary
White-rumped Sandpiper	Calidris fuscicollis	435	2018-05-17	Spring	Cayman Islands	North Side	L1061301	19.3474	-81.2082	S45775133	International Shorebird Survey (ISS)
White-rumped Sandpiper	Calidris fuscicollis	320	2018-05-21	Spring	Cayman Islands	East End	L884962	19.3365	-81.0862	S45897034	International Shorebird Survey (ISS)
White-rumped Sandpiper	Calidris fuscicollis	250	2013-05-06	Spring	Cayman Islands	Bodden Town	L1099794	19.298	-81.2232	S14013197	Stationary
White-rumped Sandpiper	Calidris fuscicollis	185	2016-05-05	Spring	Cayman Islands	East End	L884962	19.3365	-81.0862	S29417637	Traveling
White-rumped Sandpiper	Calidris fuscicollis	150	2017-04-27	Spring	Cayman Islands	Little Cayman	L813799	19.6624	-80.0816	S36545930	Stationary
White-rumped Sandpiper	Calidris fuscicollis	120	2016-05-07	Spring	Cayman Islands	North Side	L1061301	19.3474	-81.2082	S29493708	CWC Point Count
White-rumped Sandpiper	Calidris fuscicollis	100	2013-05-06	Spring	Cayman Islands	Bodden Town	L793745	19.2933	-81.2288	S14012948	Stationary
White-rumped Sandpiper	Calidris fuscicollis	85	2014-05-18	Spring	Cayman Islands	North Side	L1061301	19.3474	-81.2082	S18450050	Stationary
White-rumped Sandpiper	Calidris fuscicollis	5	2017-12-10	Winter	Saint Kitts and Nevis	Saint Kitts	L6549217	17.3144	-62.6975	S41022909	Traveling
White-rumped Sandpiper	Calidris fuscicollis	5	2013-12-01	Winter	Trinidad and Tobago	San Juan-Laventille	L616318	10.5967	-61.4519	S15840192	Traveling
White-rumped Sandpiper	Calidris fuscicollis	4	2015-12-08	Winter	Barbados	Saint Lucy	L1906315	13.2948	-59.6346	S26209784	Traveling
White-rumped Sandpiper	Calidris fuscicollis	4	2015-01-17	Winter	Jamaica	Saint Elizabeth	L877493	18.0391	-77.9352	S21389288	Traveling
White-rumped Sandpiper	Calidris fuscicollis	4	2017-01-29	Winter	Puerto Rico	Cabo Rojo	L1268031	17.9614	-67.2099	S34078631	CWC Point Count
White-rumped Sandpiper	Calidris fuscicollis	3	2017-12-21	Winter	Barbados	Saint Philip	L2603876	13.1102	-59.4912	S41226660	Traveling
White-rumped Sandpiper	Calidris fuscicollis	2	2017-12-04	Winter	Barbados	Saint Lucy	L6534863	13.3324	-59.6117	S41051282	Stationary
White-rumped Sandpiper	Calidris fuscicollis	2	2013-12-02	Winter	Puerto Rico	Cabo Rojo	L323798	17.9337	-67.1922	S15840212	Traveling
White-rumped Sandpiper	Calidris fuscicollis	2	2019-12-27	Winter	Puerto Rico	Camuy	L4564353	18.4888	-66.8462	S62666831	Traveling
White-rumped Sandpiper	Calidris fuscicollis	2	2019-02-10	Winter	Trinidad and Tobago	San Juan-Laventille	L7110267	10.6297	-61.4385	S52550309	Stationary
Willet	Tringa semipalmata	170	2013-11-24	Fall	Cuba	Pinar del Rio	L2745787	22.3292	-83.2741	S17682692	CWC Area Search
Willet	Tringa semipalmata	138	2012-11-24	Fall	Cuba	Pinar del Rio	L2745787	22.3292	-83.2741	S17679195	CWC Area Search
Willet	Tringa semipalmata	74	2014-10-30	Fall	Saint Vincent and the Grenadines	Grenadines	L1291557	12.5921	-61.4342	S20438460	CWC Area Search
Willet	Tringa semipalmata	61	2013-11-20	Fall	Saint Vincent and the Grenadines	Grenadines	L1916377	12.6022	-61.4232	S15724456	Traveling
Willet	Tringa semipalmata	60	2011-08-05	Fall	Trinidad and Tobago	Couva-Tabaquite-Talparo	L620681	10.4628	-61.481	S9356055	Stationary
Willet	Tringa semipalmata	58	2018-11-16	Fall	Cuba	Ciego de Avila	L8218420	22.4523	-78.3747	S50448489	Stationary
Willet	Tringa semipalmata	54	2017-10-12	Fall	Saint Vincent and the Grenadines	Grenadines	L1291557	12.5921	-61.4342	S39861922	CWC Area Search
Willet	Tringa semipalmata	53	2019-09-21	Fall	Trinidad and Tobago	Couva-Tabaquite-Talparo	L620681	10.4628	-61.481	S59991199	CWC Point Count
Willet	Tringa semipalmata	50	2019-11-11	Fall	Cuba	Ciego de Avila	L3455848	22.4148	-78.417	S62427386	Stationary
Willet	Tringa semipalmata	49	2016-11-24	Fall	Puerto Rico	Guayama	L3036763	17.9389	-66.1674	S32728668	Traveling
Willet	Tringa semipalmata	138	2013-03-15	Spring	Cuba	Pinar del Rio	L2745787	22.3292	-83.2741	S17680462	CWC Area Search
Willet	Tringa semipalmata	67	2012-03-22	Spring	Cuba	Pinar del Rio	L2745787	22.3292	-83.2741	S17678591	CWC Area Search
Willet	Tringa semipalmata	58	2019-03-09	Spring	Cuba	Ciego de Avila	L8821585	22.4322	-78.3809	S54048369	Stationary
Willet	Tringa semipalmata	41	2019-04-16	Spring	Saint Martin (French part)	Saint Martin (French part)	L3679159	18.0805	-63.0185	S55256952	CWC Area Search
Willet	Tringa semipalmata	40	2018-04-21	Spring	Bahamas	Inagua	L3162373	21.0666	-73.5457	S44779004	Traveling
Willet	Tringa semipalmata	40	2017-03-21	Spring	Cuba	Matanzas	L2149307	22.1404	-80.9644	S35402626	Traveling
Willet	Tringa semipalmata	40	2016-04-02	Spring	Cuba	Matanzas	L3528694	22.1341	-81.2803	S30564832	Traveling
Willet	Tringa semipalmata	40	2018-04-10	Spring	Cuba	Matanzas	L3528694	22.1341	-81.2803	S44664688	Traveling
Willet	Tringa semipalmata	40	2018-03-19	Spring	Cuba	Las Tunas	L7242374	21.351	-76.6603	S44720106	Traveling
Willet	Tringa semipalmata	40	2010-03-08	Spring	Cuba	Matanzas	L882991	22.2893	-81.2025	S6247029	Traveling
Willet	Tringa semipalmata	40	2010-03-19	Spring	Dominican Republic	Monte Cristi	L2456128	19.7121	-71.6934	S40706922	Traveling
Willet	Tringa semipalmata	200	2012-01-28	Winter	Cuba	Matanzas	L1410409	23.1994	-81.136	S9799009	Traveling
Willet	Tringa semipalmata	200	2015-01-26	Winter	Cuba	Artemisa	L3364372	22.9697	-83.1591	S21843261	Traveling
Willet	Tringa semipalmata	200	2019-02-28	Winter	Cuba	Ciego de Avila	L8218422	22.4374	-78.3793	S53264651	Stationary
Willet	Tringa semipalmata	160	2017-01-20	Winter	Turks and Caicos Islands	Turks and Caicos Islands	L5282214	21.6461	-71.774	S33812473	Traveling
Willet	Tringa semipalmata	119	2014-01-27	Winter	Cuba	Matanzas	L2616173	22.1764	-81.2384	S16901804	CWC Area Search
Willet	Tringa semipalmata	117	2014-01-30	Winter	Cuba	Pinar del Rio	L2745787	22.3292	-83.2741	S17683301	CWC Area Search
Willet	Tringa semipalmata	106	2016-02-12	Winter	Cuba	Sancti Spiritus	L2746602	21.7146	-79.8332	S40942027	CWC Point Count
Willet	Tringa semipalmata	100	2017-01-16	Winter	Cuba	Sancti Spiritus	L5297392	21.6757	-79.5297	S34136721	Traveling
Willet	Tringa semipalmata	100	2018-01-26	Winter	Cuba	Camaguey	L6805164	21.4251	-77.8453	S42401441	Traveling
Willet	Tringa semipalmata	90	2015-02-04	Winter	Trinidad and Tobago	Couva-Tabaquite-Talparo	L620681	10.4628	-61.481	S21688463	Traveling
Wilson's Phalarope	Phalaropus tricolor	3	2017-10-03	Fall	Guadeloupe	Guadeloupe	L2331931	16.2522	-61.1878	S39532844	Traveling
Wilson's Phalarope	Phalaropus tricolor	2	2013-11-01	Fall	Cayman Islands	East End	L2407466	19.3471	-81.0983	S15547940	Stationary
Wilson's Phalarope	Phalaropus tricolor	2	2013-11-12	Fall	Dominican Republic	Peravia	L352478	18.2096	-70.537	S15665399	Stationary
Wilson's Phalarope	Phalaropus tricolor	2	2015-08-27	Fall	Dominican Republic	Peravia	L352478	18.2096	-70.537	S24787654	Traveling
Wilson's Phalarope	Phalaropus tricolor	2	2014-09-06	Fall	Guadeloupe	Guadeloupe	L2340595	16.2521	-61.1883	S19756954	Stationary
Wilson's Phalarope	Phalaropus tricolor	2	2012-11-28	Fall	Jamaica	Saint Elizabeth	L1829510	17.9774	-77.8325	S12242784	Traveling
Wilson's Phalarope	Phalaropus tricolor	2	2013-10-24	Fall	Puerto Rico	Cabo Rojo	L323798	17.9337	-67.1922	S15485824	Traveling
Wilson's Phalarope	Phalaropus tricolor	4	2014-03-31	Spring	Puerto Rico	Cabo Rojo	L358880	17.9796	-67.1684	S25225730	Incidental
Wilson's Phalarope	Phalaropus tricolor	5	2016-02-09	Winter	Caribbean Netherlands	Bonaire	L3288877	12.0292	-68.2447	S27403124	Traveling
Wilson's Phalarope	Phalaropus tricolor	4	2015-12-16	Winter	Cuba	Matanzas	L5783732	23.0637	-80.7789	S40939533	CWC Point Count
Wilson's Phalarope	Phalaropus tricolor	2	2019-12-19	Winter	Dominican Republic	Barahona	L10374149	18.3148	-71.026	S62771366	Traveling
Wilson's Phalarope	Phalaropus tricolor	2	2014-01-29	Winter	Puerto Rico	Cabo Rojo	L323798	17.9337	-67.1922	S16756081	Traveling
Wilson's Phalarope	Phalaropus tricolor	2	2015-01-25	Winter	Puerto Rico	Cabo Rojo	L682443	17.9743	-67.2111	S21529566	Traveling
Wilson's Plover	Charadrius wilsonia	275	2013-09-20	Fall	Caribbean Netherlands	Bonaire	L2361019	12.1641	-68.2826	S15215912	Stationary
Wilson's Plover	Charadrius wilsonia	61	2019-11-26	Fall	Puerto Rico	Vieques	L10202913	18.0899	-65.5123	S61782109	Stationary
Wilson's Plover	Charadrius wilsonia	54	2012-11-24	Fall	Cuba	Pinar del Rio	L2745787	22.3292	-83.2741	S17679195	CWC Area Search
Wilson's Plover	Charadrius wilsonia	52	2019-11-17	Fall	Antigua and Barbuda	Saint Peter	L1100979	17.1097	-61.7765	S62732514	Stationary
Wilson's Plover	Charadrius wilsonia	50	2016-11-12	Fall	Puerto Rico	Cabo Rojo	L343336	17.9566	-67.1993	S32499855	Traveling
Wilson's Plover	Charadrius wilsonia	37	2013-08-13	Fall	Virgin Islands (U.S.)	Saint Croix	L302098	17.7282	-64.6573	S19620662	CWC Area Search
Wilson's Plover	Charadrius wilsonia	36	2010-08-19	Fall	Puerto Rico	Lajas	L323820	17.9734	-67.0041	S6785353	Traveling
Wilson's Plover	Charadrius wilsonia	35	2014-09-28	Fall	Puerto Rico	Cabo Rojo	L3288008	18.0031	-67.1693	S21318982	Traveling
Wilson's Plover	Charadrius wilsonia	32	2012-09-09	Fall	Guadeloupe	Guadeloupe	L891744	16.2476	-61.1835	S11559779	Traveling
Wilson's Plover	Charadrius wilsonia	31	2011-08-09	Fall	Virgin Islands (U.S.)	Saint Croix	L302098	17.7282	-64.6573	S14462520	Traveling
Wilson's Plover	Charadrius wilsonia	119	2012-03-22	Spring	Cuba	Pinar del Rio	L2745787	22.3292	-83.2741	S17678591	CWC Area Search
Wilson's Plover	Charadrius wilsonia	43	2011-03-04	Spring	Puerto Rico	Cabo Rojo	L1109354	17.9635	-67.2104	S9971365	Traveling
Wilson's Plover	Charadrius wilsonia	30	2013-03-15	Spring	Cuba	Pinar del Rio	L2745787	22.3292	-83.2741	S17680462	CWC Area Search
Wilson's Plover	Charadrius wilsonia	29	2011-03-15	Spring	Virgin Islands (U.S.)	Saint Croix	L302098	17.7282	-64.6573	S14462511	Traveling
Wilson's Plover	Charadrius wilsonia	27	2019-03-21	Spring	Antigua and Barbuda	Saint John's	L584172	17.1483	-61.8514	S54069474	Traveling
Wilson's Plover	Charadrius wilsonia	27	2018-03-04	Spring	Bahamas	Freeport and West Grand Bahama	L808822	26.5422	-78.5687	S43504642	Traveling
Wilson's Plover	Charadrius wilsonia	26	2012-05-21	Spring	Virgin Islands (U.S.)	Saint Croix	L302098	17.7282	-64.6573	S13566922	Traveling
Wilson's Plover	Charadrius wilsonia	25	2015-03-20	Spring	Virgin Islands (U.S.)	Saint Croix	L302098	17.7282	-64.6573	S22439544	CWC Area Search
Wilson's Plover	Charadrius wilsonia	23	2010-04-28	Spring	Virgin Islands (U.S.)	Saint Croix	L302098	17.7282	-64.6573	S14461215	Traveling
Wilson's Plover	Charadrius wilsonia	22	2019-05-22	Spring	Bahamas	Central Abaco, Hope Town and Green Turtle Cay	L6138975	26.2928	-77.0296	S56648146	Traveling
Wilson's Plover	Charadrius wilsonia	150	2013-01-22	Winter	Cuba	Pinar del Rio	L2745787	22.3292	-83.2741	S17679526	CWC Area Search
Wilson's Plover	Charadrius wilsonia	117	2011-12-31	Winter	Puerto Rico	Cabo Rojo	L1252908	17.9565	-67.1996	S11006148	Traveling
Wilson's Plover	Charadrius wilsonia	84	2016-02-12	Winter	Cuba	Sancti Spiritus	L2746602	21.7146	-79.8332	S40942027	CWC Point Count
Wilson's Plover	Charadrius wilsonia	62	2016-12-17	Winter	Puerto Rico	Cabo Rojo	L1252908	17.9565	-67.1996	S33094253	Traveling
Wilson's Plover	Charadrius wilsonia	60	2015-01-18	Winter	Bahamas	Central Abaco, Hope Town and Green Turtle Cay	L3455054	26.7658	-77.3255	S21436105	Traveling
Wilson's Plover	Charadrius wilsonia	58	2019-12-26	Winter	Puerto Rico	Vieques	L9985107	18.0892	-65.5144	S62640797	Incidental
Wilson's Plover	Charadrius wilsonia	50	2013-01-14	Winter	Bahamas	North Andros	L1110733	24.845	-77.8997	S12854803	Stationary
Wilson's Plover	Charadrius wilsonia	50	2017-12-31	Winter	Bahamas	Central Abaco, Hope Town and Green Turtle Cay	L1676890	26.7522	-77.3177	S41674082	Traveling
Wilson's Plover	Charadrius wilsonia	50	2013-02-25	Winter	Jamaica	Saint Elizabeth	L858275	17.9767	-77.8375	S13331318	CWC Area Search
Wilson's Plover	Charadrius wilsonia	47	2012-01-22	Winter	Puerto Rico	Isabela	L1388396	18.5139	-67.0608	S9662302	Incidental
Wilson's Plover	Charadrius wilsonia	47	2019-12-26	Winter	Antigua and Barbuda	Saint Peter	L1100979	17.1097	-61.7765	S62731738	Stationary
Wilson's Snipe	Gallinago delicata	38	2013-10-28	Fall	Puerto Rico	Cabo Rojo	L323797	18.0106	-67.1612	S15511817	Traveling
Wilson's Snipe	Gallinago delicata	25	2019-10-30	Fall	Barbados	Saint Lucy	L4025466	13.295	-59.6341	S61049804	Stationary
Wilson's Snipe	Gallinago delicata	21	2014-10-29	Fall	Cayman Islands	George Town	L1264663	19.2894	-81.3729	S20373978	Stationary
Wilson's Snipe	Gallinago delicata	21	2018-11-11	Fall	Curacao	Curacao	L8135043	12.1304	-68.8922	S49892145	Traveling
Wilson's Snipe	Gallinago delicata	20	2017-11-06	Fall	Curacao	Curacao	L4601307	12.139	-68.9822	S40343802	Traveling
Wilson's Snipe	Gallinago delicata	15	2018-11-05	Fall	Barbados	Saint Lucy	L4025466	13.295	-59.6341	S49691468	Traveling
Wilson's Snipe	Gallinago delicata	14	2019-11-11	Fall	Curacao	Curacao	L4601307	12.139	-68.9822	S61626860	Traveling
Wilson's Snipe	Gallinago delicata	12	2016-10-20	Fall	Bahamas	Central Abaco, Hope Town and Green Turtle Cay	L1739787	26.3915	-77.0964	S32131821	Traveling
Wilson's Snipe	Gallinago delicata	12	2019-10-29	Fall	Barbados	Saint Philip	L2603876	13.1102	-59.4912	S61017306	Traveling
Wilson's Snipe	Gallinago delicata	12	2019-10-29	Fall	Barbados	Christ Church	L2603933	13.0892	-59.5231	S61016792	Traveling
Wilson's Snipe	Gallinago delicata	12	2014-10-25	Fall	Cayman Islands	Bodden Town	L1827052	19.2862	-81.2856	S20337830	Traveling
Wilson's Snipe	Gallinago delicata	12	2017-11-21	Fall	Virgin Islands (U.S.)	Saint Croix	L302135	17.7587	-64.665	S44690294	CWC Area Search
Wilson's Snipe	Gallinago delicata	270	2013-03-20	Spring	Cuba	Matanzas	L2746996	22.19	-81.02	S17765851	CWC Area Search
Wilson's Snipe	Gallinago delicata	211	2013-03-18	Spring	Cuba	Matanzas	L2746996	22.19	-81.02	S17765827	CWC Area Search
Wilson's Snipe	Gallinago delicata	118	2012-03-18	Spring	Cuba	Matanzas	L2746996	22.19	-81.02	S17800688	CWC Area Search
Wilson's Snipe	Gallinago delicata	16	2017-03-04	Spring	Barbados	Christ Church	L2603933	13.0892	-59.5231	S34948703	Traveling
Wilson's Snipe	Gallinago delicata	11	2015-03-07	Spring	Barbados	Christ Church	L3344246	13.1027	-59.4968	S22222170	Stationary
Wilson's Snipe	Gallinago delicata	7	2019-03-13	Spring	Guadeloupe	Guadeloupe	L2654485	16.4156	-61.4838	S53786652	Traveling
Wilson's Snipe	Gallinago delicata	7	2017-04-07	Spring	Puerto Rico	Arecibo	L5745568	18.4405	-66.6697	S36251910	Area
Wilson's Snipe	Gallinago delicata	6	2017-03-01	Spring	Guadeloupe	Guadeloupe	L2442944	16.4447	-61.5328	S34893421	Traveling
Wilson's Snipe	Gallinago delicata	5	2010-03-10	Spring	Bahamas	Freeport and West Grand Bahama	L791657	26.5119	-78.6489	S6112267	Traveling
Wilson's Snipe	Gallinago delicata	5	2014-03-05	Spring	Barbados	Christ Church	L1133547	13.1018	-59.499	S17327955	Stationary
Wilson's Snipe	Gallinago delicata	5	2018-03-04	Spring	Barbados	Christ Church	L2603933	13.0892	-59.5231	S43363459	Traveling
Wilson's Snipe	Gallinago delicata	5	2013-03-15	Spring	Cuba	La Habana	L3326768	23.0225	-82.3587	S21598451	Traveling
Wilson's Snipe	Gallinago delicata	5	2015-03-01	Spring	Puerto Rico	Humacao	L1782395	18.1455	-65.7711	S22162363	Traveling
Wilson's Snipe	Gallinago delicata	464	2014-02-18	Winter	Cuba	Matanzas	L2746996	22.19	-81.02	S17801120	CWC Area Search
Wilson's Snipe	Gallinago delicata	100	2019-12-08	Winter	Cuba	Pinar del Rio	L10269845	22.4299	-83.2167	S62180970	Traveling
Wilson's Snipe	Gallinago delicata	47	2017-01-29	Winter	Barbados	Saint Lucy	L3633902	13.3015	-59.6236	S34007710	Traveling
Wilson's Snipe	Gallinago delicata	36	2017-01-23	Winter	Guadeloupe	Guadeloupe	L4822036	16.4424	-61.5326	S33885238	CWC Area Search
Wilson's Snipe	Gallinago delicata	26	2013-12-14	Winter	Haiti	Sud	L1355451	18.2041	-73.7317	S16007691	Traveling
Wilson's Snipe	Gallinago delicata	25	2010-01-16	Winter	Trinidad and Tobago	Siparia	L623228	10.2009	-61.4811	S6306053	Traveling
Wilson's Snipe	Gallinago delicata	18	2018-12-26	Winter	Barbados	Saint Philip	L2603876	13.1102	-59.4912	S50961781	Traveling
Wilson's Snipe	Gallinago delicata	18	2018-02-12	Winter	Puerto Rico	Cabo Rojo	L2388401	18.0157	-67.1549	S42718324	Stationary
Wilson's Snipe	Gallinago delicata	16	2019-12-21	Winter	Barbados	Saint Lucy	L4025466	13.295	-59.6341	S62492207	Stationary
Wilson's Snipe	Gallinago delicata	16	2019-01-23	Winter	Barbados	Christ Church	L2603933	13.0892	-59.5231	S51957736	Traveling

## Sheet: Monte Cristi multi-day Data
MONTE CRISTI, DR MULTIDAY (up to 3 days) SURVEYS
COMMON NAME	SCIENTIFIC NAME		COUNT	DATE	LATITUDE	LONGITUDE	SAMPLING EVENT IDENTIFIER	PROTOCOL TYPE
Semipalmated Sandpiper	Calidris pusilla		350	2012-03-12	19.8655	-71.6497	S11660647	CWC Area Search
Semipalmated Sandpiper	Calidris pusilla		70	2012-03-13	19.8079	-71.735	S11660860	CWC Area Search
Semipalmated Sandpiper	Calidris pusilla		200	2012-03-13	19.7757	-71.6995	S11660794	CWC Area Search
Semipalmated Sandpiper	Calidris pusilla		500	2012-03-13	19.8027	-71.7363	S11660929	CWC Area Search
Semipalmated Sandpiper	Calidris pusilla		25	2012-03-14	19.6982	-71.7263	S11661002	CWC Area Search
		Total	1145
Semipalmated Sandpiper	Calidris pusilla		70	2012-10-09	19.8655	-71.6497	S12031536	CWC Area Search
Semipalmated Sandpiper	Calidris pusilla		1500	2012-10-09	19.7932	-71.7498	S12030655	CWC Area Search
Semipalmated Sandpiper	Calidris pusilla		5	2012-10-11	19.6982	-71.7263	S12031463	CWC Area Search
Semipalmated Sandpiper	Calidris pusilla		15	2012-10-11	19.7691	-71.7404	S12031005	CWC Area Search
		Total	1590
Semipalmated Sandpiper	Calidris pusilla		22	2013-11-18	19.8747	-71.6549	S15876865	CWC Area Search
Semipalmated Sandpiper	Calidris pusilla		10	2013-11-19	19.856	-71.6562	S15877398	CWC Area Search
Semipalmated Sandpiper	Calidris pusilla		3000	2013-11-19	19.8126	-71.7067	S15878860	CWC Area Search
Semipalmated Sandpiper	Calidris pusilla		22	2013-11-20	19.7103	-71.6836	S15879800	CWC Area Search
Semipalmated Sandpiper	Calidris pusilla		35	2013-11-20	19.7121	-71.6934	S15880497	CWC Area Search
Semipalmated Sandpiper	Calidris pusilla		50	2013-11-20	19.7129	-71.7026	S15880199	CWC Area Search
		Total	3139
Semipalmated Sandpiper	Calidris pusilla		80	2014-01-27	19.856	-71.6562	S16783189	CWC Area Search
Semipalmated Sandpiper	Calidris pusilla		225	2014-01-27	19.8747	-71.6549	S16782957	CWC Area Search
Semipalmated Sandpiper	Calidris pusilla		139	2014-01-28	19.856	-71.6562	S16783507	CWC Area Search
Semipalmated Sandpiper	Calidris pusilla		290	2014-01-28	19.8126	-71.7067	S16795381	CWC Area Search
		Total	734
Semipalmated Sandpiper	Calidris pusilla		39	2019-01-28	19.856	-71.6562	S53695977	CWC Area Search
Semipalmated Sandpiper	Calidris pusilla		600	2019-01-28	19.8126	-71.7067	S53778173	CWC Area Search
Semipalmated Sandpiper	Calidris pusilla		14	2019-01-29	19.7314	-71.7111	S53755052	CWC Area Search
Semipalmated Sandpiper	Calidris pusilla		125	2019-01-29	19.7129	-71.7026	S53754599	CWC Area Search
		Total	778
Snowy Plover	Charadrius nivosus		4	2016-09-12	19.7314	-71.7111	S32689546	CWC Area Search
Snowy Plover	Charadrius nivosus		18	2016-09-12	19.7121	-71.6934	S32684127	CWC Area Search
		Total	22
Western Sandpiper	Calidris mauri		4	2013-11-18	19.8747	-71.6549	S15876865	CWC Area Search
Western Sandpiper	Calidris mauri		150	2013-11-19	19.8126	-71.7067	S15878860	CWC Area Search
		Total	154
Western Sandpiper	Calidris mauri		48	2014-01-27	19.856	-71.6562	S16783189	CWC Area Search
Western Sandpiper	Calidris mauri		3	2014-01-28	19.8747	-71.6549	S16784045	CWC Area Search
Western Sandpiper	Calidris mauri		53	2014-01-28	19.8126	-71.7067	S16795381	CWC Area Search
		Total	104
Stilt Sandpiper	Calidris himantopus		75	2013-11-19	19.8126	-71.7067	S15878860	CWC Area Search
Stilt Sandpiper	Calidris himantopus		21	2013-11-19	19.856	-71.6562	S15877398	CWC Area Search
Stilt Sandpiper	Calidris himantopus		1225	2013-11-20	19.7121	-71.6934	S15880497	CWC Area Search
Stilt Sandpiper	Calidris himantopus		625	2013-11-20	19.7103	-71.6836	S15879800	CWC Area Search
Stilt Sandpiper	Calidris himantopus		255	2013-11-20	19.7129	-71.7026	S15880199	CWC Area Search
Stilt Sandpiper	Calidris himantopus		12	2013-11-20	19.7314	-71.7111	S15889256	CWC Area Search
		Total	2213
Stilt Sandpiper	Calidris himantopus		15	2015-10-01	19.856	-71.6562	S27249857	Traveling
Stilt Sandpiper	Calidris himantopus		400	2015-10-02	19.7121	-71.6934	S27249840	Traveling
Stilt Sandpiper	Calidris himantopus		150	2015-10-02	19.7103	-71.6836	S27249851	Traveling
Stilt Sandpiper	Calidris himantopus		48	2015-10-02	19.7129	-71.7026	S27249849	Traveling
Stilt Sandpiper	Calidris himantopus		23	2015-10-02	19.7314	-71.7111	S26506468	Traveling
		Total	636
Stilt Sandpiper	Calidris himantopus		3	2015-02-23	19.8747	-71.6549	S22796212	CWC Area Search
Stilt Sandpiper	Calidris himantopus		26	2015-02-24	19.856	-71.6562	S22802191	CWC Area Search
Stilt Sandpiper	Calidris himantopus		500	2015-02-25	19.7121	-71.6934	S22804052	CWC Area Search
Stilt Sandpiper	Calidris himantopus		30	2015-02-25	19.7129	-71.7026	S22803623	CWC Area Search
Stilt Sandpiper	Calidris himantopus		8	2015-02-25	19.7103	-71.6836	S22802714	CWC Area Search
		Total	567
Stilt Sandpiper	Calidris himantopus		26	2019-01-28	19.856	-71.6562	S53695977	CWC Area Search
Stilt Sandpiper	Calidris himantopus		900	2019-01-29	19.7121	-71.6934	S53753346	CWC Area Search
Stilt Sandpiper	Calidris himantopus		120	2019-01-29	19.7103	-71.6836	S53778102	CWC Area Search
Stilt Sandpiper	Calidris himantopus		15	2019-01-29	19.7314	-71.7111	S53755052	CWC Area Search
		Total	1061
Stilt Sandpiper	Calidris himantopus		260	2013-03-19	19.7691	-71.7404	S13689334	CWC Area Search
Stilt Sandpiper	Calidris himantopus		20	2013-03-20	19.7757	-71.6995	S13688969	CWC Area Search
Stilt Sandpiper	Calidris himantopus		7	2013-03-20	19.6982	-71.7263	S13688848	CWC Area Search
		Total	287
Black-necked Stilt	Himantopus mexicanus		15	2012-03-12	19.8655	-71.6497	S11660647	CWC Area Search
Black-necked Stilt	Himantopus mexicanus		15	2012-03-13	19.7925	-71.7612	S11660701	CWC Area Search
Black-necked Stilt	Himantopus mexicanus		20	2012-03-13	19.7757	-71.6995	S11660794	CWC Area Search
Black-necked Stilt	Himantopus mexicanus		60	2012-03-13	19.8079	-71.735	S11660860	CWC Area Search
Black-necked Stilt	Himantopus mexicanus		318	2012-03-13	19.8027	-71.7363	S11660929	CWC Area Search
Black-necked Stilt	Himantopus mexicanus		9	2012-03-14	19.6982	-71.7263	S11661002	CWC Area Search
		Total	437
Black-necked Stilt	Himantopus mexicanus		18	2013-03-18	19.7925	-71.7612	S13688719	CWC Area Search
Black-necked Stilt	Himantopus mexicanus		35	2013-03-19	19.8027	-71.7363	S13689075	CWC Area Search
Black-necked Stilt	Himantopus mexicanus		35	2013-03-19	19.804	-71.7144	S13697490	CWC Area Search
Black-necked Stilt	Himantopus mexicanus		265	2013-03-19	19.8079	-71.735	S13697098	CWC Area Search
Black-necked Stilt	Himantopus mexicanus		450	2013-03-19	19.7691	-71.7404	S13689334	CWC Area Search
Black-necked Stilt	Himantopus mexicanus		15	2013-03-20	19.6982	-71.7263	S13688848	CWC Area Search
		Total	818
Black-necked Stilt	Himantopus mexicanus		24	2012-10-09	19.8655	-71.6497	S12031536	CWC Area Search
Black-necked Stilt	Himantopus mexicanus		30	2012-10-09	19.7932	-71.7498	S12030655	CWC Area Search
Black-necked Stilt	Himantopus mexicanus		365	2012-10-10	19.8079	-71.735	S12031400	CWC Area Search
Black-necked Stilt	Himantopus mexicanus		10	2012-10-11	19.6982	-71.7263	S12031463	CWC Area Search
Black-necked Stilt	Himantopus mexicanus		200	2012-10-11	19.7691	-71.7404	S12031005	CWC Area Search
		Total	629
Black-necked Stilt	Himantopus mexicanus		3	2013-11-19	19.8747	-71.6549	S15877707	CWC Area Search
Black-necked Stilt	Himantopus mexicanus		280	2013-11-19	19.856	-71.6562	S15877398	CWC Area Search
Black-necked Stilt	Himantopus mexicanus		15	2013-11-20	19.7103	-71.6836	S15879800	CWC Area Search
Black-necked Stilt	Himantopus mexicanus		150	2013-11-20	19.7314	-71.7111	S15889256	CWC Area Search
Black-necked Stilt	Himantopus mexicanus		2332	2013-11-20	19.7121	-71.6934	S15880497	CWC Area Search
Black-necked Stilt	Himantopus mexicanus		2700	2013-11-20	19.7129	-71.7026	S15880199	CWC Area Search
		Total	5480
Black-necked Stilt	Himantopus mexicanus		20	2015-10-01	19.856	-71.6562	S26501869	Traveling
Black-necked Stilt	Himantopus mexicanus		200	2015-10-02	19.7314	-71.7111	S27249826	Traveling
Black-necked Stilt	Himantopus mexicanus		1500	2015-10-02	19.7129	-71.7026	S27249849	Traveling
Black-necked Stilt	Himantopus mexicanus		12	2015-10-03	19.705	-71.7388	S26507470	Traveling
		Total	1732
Black-necked Stilt	Himantopus mexicanus		15	2014-01-28	19.705	-71.7388	S16784267	CWC Area Search
Black-necked Stilt	Himantopus mexicanus		20	2014-01-28	19.8747	-71.6549	S16784045	CWC Area Search
Black-necked Stilt	Himantopus mexicanus		69	2014-01-28	19.856	-71.6562	S16783507	CWC Area Search
Black-necked Stilt	Himantopus mexicanus		123	2014-01-29	19.8571	-71.6405	S16784806	CWC Area Search
Black-necked Stilt	Himantopus mexicanus		21	2014-01-30	19.7314	-71.7111	S16791647	CWC Area Search
Black-necked Stilt	Himantopus mexicanus		40	2014-01-30	19.7121	-71.6934	S16795371	CWC Area Search
Black-necked Stilt	Himantopus mexicanus		700	2014-01-30	19.7129	-71.7026	S16791652	CWC Area Search
		Total	988
Black-necked Stilt	Himantopus mexicanus		12	2015-02-23	19.8747	-71.6549	S22796287	CWC Area Search
Black-necked Stilt	Himantopus mexicanus		159	2015-02-23	19.856	-71.6562	S22805960	CWC Area Search
Black-necked Stilt	Himantopus mexicanus		8	2015-02-24	19.8747	-71.6549	S22796521	CWC Area Search
Black-necked Stilt	Himantopus mexicanus		56	2015-02-24	19.8126	-71.7067	S22802087	CWC Area Search
Black-necked Stilt	Himantopus mexicanus		7	2015-02-25	19.7314	-71.7111	S22804045	CWC Area Search
Black-necked Stilt	Himantopus mexicanus		44	2015-02-25	19.7121	-71.6934	S22802999	CWC Area Search
Black-necked Stilt	Himantopus mexicanus		1700	2015-02-25	19.7129	-71.7026	S22803623	CWC Area Search
		Total	1986
Black-necked Stilt	Himantopus mexicanus		35	2017-02-12	19.6813	-71.6799	S34978543	Stationary
Black-necked Stilt	Himantopus mexicanus		46	2017-02-12	19.7924	-71.6566	S35389313	Traveling
Black-necked Stilt	Himantopus mexicanus		91	2017-02-12	19.856	-71.6562	S35389351	CWC Area Search
Black-necked Stilt	Himantopus mexicanus		17	2017-02-13	19.7121	-71.6934	S34351702	CWC Area Search
Black-necked Stilt	Himantopus mexicanus		40	2017-02-13	19.7129	-71.7026	S34405207	CWC Area Search
Black-necked Stilt	Himantopus mexicanus		737	2017-02-13	19.7103	-71.6836	S35389253	CWC Area Search
		Total	966
Least Sandpiper	Calidris minutilla		125	2012-03-12	19.8655	-71.6497	S11660647	CWC Area Search
Least Sandpiper	Calidris minutilla		500	2012-03-13	19.8027	-71.7363	S11660929	CWC Area Search
Least Sandpiper	Calidris minutilla		470	2012-03-13	19.7757	-71.6995	S11660794	CWC Area Search
Least Sandpiper	Calidris minutilla		250	2012-03-13	19.7925	-71.7612	S11660701	CWC Area Search
Least Sandpiper	Calidris minutilla		6	2012-03-13	19.8079	-71.735	S11660860	CWC Area Search
Least Sandpiper	Calidris minutilla		5	2012-03-14	19.6982	-71.7263	S11661002	CWC Area Search
		Total	1356
Least Sandpiper	Calidris minutilla		2000	2012-10-09	19.7932	-71.7498	S12030655	CWC Area Search
Least Sandpiper	Calidris minutilla		125	2012-10-09	19.8655	-71.6497	S12031536	CWC Area Search
Least Sandpiper	Calidris minutilla		8	2012-10-11	19.7691	-71.7404	S12031005	CWC Area Search
Least Sandpiper	Calidris minutilla		2	2012-10-11	19.6982	-71.7263	S12031463	CWC Area Search
		Total	2135
Least Sandpiper	Calidris minutilla		9	2013-11-18	19.8747	-71.6549	S15876865	CWC Area Search
Least Sandpiper	Calidris minutilla		1500	2013-11-19	19.8126	-71.7067	S15878860	CWC Area Search
Least Sandpiper	Calidris minutilla		112	2013-11-19	19.856	-71.6562	S15877398	CWC Area Search
Least Sandpiper	Calidris minutilla		175	2013-11-20	19.7129	-71.7026	S15880199	CWC Area Search
Least Sandpiper	Calidris minutilla		52	2013-11-20	19.7121	-71.6934	S15880497	CWC Area Search
Least Sandpiper	Calidris minutilla		8	2013-11-20	19.7314	-71.7111	S15889256	CWC Area Search
Least Sandpiper	Calidris minutilla		3	2013-11-20	19.7103	-71.6836	S15879800	CWC Area Search
		Total	1859
Least Sandpiper	Calidris minutilla		350	2019-01-28	19.856	-71.6562	S53691379	CWC Area Search
Least Sandpiper	Calidris minutilla		300	2019-01-28	19.8126	-71.7067	S53778173	CWC Area Search
Least Sandpiper	Calidris minutilla		800	2019-01-29	19.7121	-71.6934	S53753346	CWC Area Search
Least Sandpiper	Calidris minutilla		550	2019-01-29	19.7129	-71.7026	S53754599	CWC Area Search
Least Sandpiper	Calidris minutilla		25	2019-01-29	19.7314	-71.7111	S53778069	CWC Area Search
		Total	2025
Greater Yellowlegs	Tringa melanoleuca		14	2013-11-19	19.856	-71.6562	S15877398	CWC Area Search
Greater Yellowlegs	Tringa melanoleuca		11	2013-11-20	19.7314	-71.7111	S15889256	CWC Area Search
Greater Yellowlegs	Tringa melanoleuca		35	2013-11-20	19.7103	-71.6836	S15879800	CWC Area Search
Greater Yellowlegs	Tringa melanoleuca		270	2013-11-20	19.7121	-71.6934	S15880497	CWC Area Search
Greater Yellowlegs	Tringa melanoleuca		530	2013-11-20	19.7129	-71.7026	S15880199	CWC Area Search
		Total	860
Greater Yellowlegs	Tringa melanoleuca		3	2016-09-10	19.8747	-71.6549	S32689558	CWC Area Search
Greater Yellowlegs	Tringa melanoleuca		17	2016-09-10	19.856	-71.6562	S32682272	CWC Area Search
Greater Yellowlegs	Tringa melanoleuca		4	2016-09-12	19.7314	-71.7111	S32684378	CWC Area Search
Greater Yellowlegs	Tringa melanoleuca		5	2016-09-12	19.7129	-71.7026	S32689549	CWC Area Search
Greater Yellowlegs	Tringa melanoleuca		11	2016-09-12	19.7121	-71.6934	S32689548	CWC Area Search
Greater Yellowlegs	Tringa melanoleuca		35	2016-09-12	19.7103	-71.6836	S32689554	CWC Area Search
		Total	75
Greater Yellowlegs	Tringa melanoleuca		3	2015-09-30	19.8747	-71.6549	S27249861	Traveling
Greater Yellowlegs	Tringa melanoleuca		2	2015-10-01	19.856	-71.6562	S27249857	Traveling
Greater Yellowlegs	Tringa melanoleuca		6	2015-10-02	19.7314	-71.7111	S26506468	Traveling
Greater Yellowlegs	Tringa melanoleuca		9	2015-10-02	19.7121	-71.6934	S26503643	Traveling
Greater Yellowlegs	Tringa melanoleuca		55	2015-10-02	19.7129	-71.7026	S26503291	Traveling
Greater Yellowlegs	Tringa melanoleuca		3	2015-10-03	19.705	-71.7388	S26507470	Traveling
		Total	78
Greater Yellowlegs	Tringa melanoleuca		18	2019-01-28	19.856	-71.6562	S53695977	CWC Area Search
Greater Yellowlegs	Tringa melanoleuca		31	2019-01-28	19.705	-71.7388	S53748211	CWC Area Search
Greater Yellowlegs	Tringa melanoleuca		19	2019-01-29	19.7103	-71.6836	S53754085	CWC Area Search
Greater Yellowlegs	Tringa melanoleuca		19	2019-01-29	19.7129	-71.7026	S53754599	CWC Area Search
Greater Yellowlegs	Tringa melanoleuca		22	2019-01-29	19.8057	-71.7008	S53751967	CWC Area Search
Greater Yellowlegs	Tringa melanoleuca		56	2019-01-29	19.7314	-71.7111	S53755052	CWC Area Search
Greater Yellowlegs	Tringa melanoleuca		68	2019-01-29	19.7121	-71.6934	S53753346	CWC Area Search
		Total	233
Lesser Yellowlegs	Tringa flavipes		7	2013-03-18	19.8655	-71.6497	S13686222	CWC Area Search
Lesser Yellowlegs	Tringa flavipes		25	2013-03-18	19.7925	-71.7612	S13688719	CWC Area Search
Lesser Yellowlegs	Tringa flavipes		4	2013-03-19	19.804	-71.7144	S13697490	CWC Area Search
Lesser Yellowlegs	Tringa flavipes		15	2013-03-19	19.8079	-71.735	S13697098	CWC Area Search
Lesser Yellowlegs	Tringa flavipes		60	2013-03-19	19.7691	-71.7404	S13689334	CWC Area Search
Lesser Yellowlegs	Tringa flavipes		350	2013-03-19	19.8027	-71.7363	S13689075	CWC Area Search
Lesser Yellowlegs	Tringa flavipes		7	2013-03-20	19.6982	-71.7263	S13688848	CWC Area Search
Lesser Yellowlegs	Tringa flavipes		13	2013-03-20	19.7757	-71.6995	S13688969	CWC Area Search
		Total	481
Lesser Yellowlegs	Tringa flavipes		7	2013-11-18	19.8747	-71.6549	S15876865	CWC Area Search
Lesser Yellowlegs	Tringa flavipes		2	2013-11-19	19.8747	-71.6549	S15877707	CWC Area Search
Lesser Yellowlegs	Tringa flavipes		10	2013-11-19	19.8126	-71.7067	S15878860	CWC Area Search
Lesser Yellowlegs	Tringa flavipes		25	2013-11-19	19.856	-71.6562	S15877398	CWC Area Search
Lesser Yellowlegs	Tringa flavipes		32	2013-11-20	19.7314	-71.7111	S15889256	CWC Area Search
Lesser Yellowlegs	Tringa flavipes		53	2013-11-20	19.7121	-71.6934	S15880497	CWC Area Search
Lesser Yellowlegs	Tringa flavipes		90	2013-11-20	19.7103	-71.6836	S15879800	CWC Area Search
Lesser Yellowlegs	Tringa flavipes		3000	2013-11-20	19.7129	-71.7026	S15880199	CWC Area Search
		Total	3219
Lesser Yellowlegs	Tringa flavipes		12	2015-09-30	19.8747	-71.6549	S26501279	Traveling
Lesser Yellowlegs	Tringa flavipes		4	2015-10-01	19.856	-71.6562	S26501869	Traveling
Lesser Yellowlegs	Tringa flavipes		27	2015-10-02	19.7121	-71.6934	S27249840	Traveling
Lesser Yellowlegs	Tringa flavipes		700	2015-10-02	19.7129	-71.7026	S26503291	Traveling
Lesser Yellowlegs	Tringa flavipes		10	2015-10-03	19.705	-71.7388	S27249812	Traveling
		Total	753
Lesser Yellowlegs	Tringa flavipes		6	2019-11-29	19.856	-71.6562	S62113580	Historical
Lesser Yellowlegs	Tringa flavipes		880	2019-11-30	19.7016	-71.7363	S62111918	Stationary
		Total	886
Lesser Yellowlegs	Tringa flavipes		5	2019-01-28	19.8747	-71.6549	S53746103	CWC Area Search
Lesser Yellowlegs	Tringa flavipes		15	2019-01-28	19.705	-71.7388	S53748211	CWC Area Search
Lesser Yellowlegs	Tringa flavipes		70	2019-01-28	19.8126	-71.7067	S53746709	CWC Area Search
Lesser Yellowlegs	Tringa flavipes		73	2019-01-28	19.856	-71.6562	S53695977	CWC Area Search
Lesser Yellowlegs	Tringa flavipes		30	2019-01-29	19.7314	-71.7111	S53755052	CWC Area Search
Lesser Yellowlegs	Tringa flavipes		30	2019-01-29	19.8057	-71.7008	S53778100	CWC Area Search
Lesser Yellowlegs	Tringa flavipes		110	2019-01-29	19.7121	-71.6934	S53753346	CWC Area Search
Lesser Yellowlegs	Tringa flavipes		119	2019-01-29	19.7103	-71.6836	S53754085	CWC Area Search
Lesser Yellowlegs	Tringa flavipes		144	2019-01-29	19.7129	-71.7026	S53754599	CWC Area Search
Lesser Yellowlegs	Tringa flavipes		18	2019-01-30	19.6089	-71.505	S53756125	CWC Area Search
		Total	614

## Sheet: >10 Snowy Plover Data
COMMON NAME	SCIENTIFIC NAME	COUNT	DATE	SEASON	COUNTRY	STATE	LOCALITY ID	LATITUDE	LONGITUDE	SAMPLING EVENT IDENTIFIER	PROTOCOL TYPE
Snowy Plover	Charadrius nivosus	41	2019-10-30	Fall	Caribbean Netherlands	Bonaire	L835715	12.2759	-68.3565	S62881065	Stationary
Snowy Plover	Charadrius nivosus	40	2015-11-19	Fall	Haiti	Nord-Est	L4016009	19.6437	-71.8147	S25942244	Traveling
Snowy Plover	Charadrius nivosus	30	2017-11-10	Fall	Puerto Rico	Carolina	L6480865	18.4384	-66.0027	S40558558	Incidental
Snowy Plover	Charadrius nivosus	29	2015-09-04	Fall	Caribbean Netherlands	Bonaire	L2633397	12.2207	-68.3755	S24887855	Traveling
Snowy Plover	Charadrius nivosus	21	2013-11-03	Fall	Turks and Caicos Islands	Turks and Caicos Islands	L2403786	21.4963	-71.5258	S15571873	CWC Area Search
Snowy Plover	Charadrius nivosus	20	2018-08-05	Fall	Puerto Rico	Cabo Rojo	L343336	17.9566	-67.1993	S47733249	Traveling
Snowy Plover	Charadrius nivosus	20	2018-10-12	Fall	Caribbean Netherlands	Bonaire	L835715	12.2759	-68.3565	S49694662	Stationary
Snowy Plover	Charadrius nivosus	20	2019-09-14	Fall	Caribbean Netherlands	Bonaire	L2633397	12.2207	-68.3755	S59795123	Traveling
Snowy Plover	Charadrius nivosus	19	2015-10-02	Fall	Dominican Republic	Monte Cristi	L2457185	19.7314	-71.7111	S26506468	Traveling
Snowy Plover	Charadrius nivosus	18	2016-09-12	Fall	Dominican Republic	Monte Cristi	L2456128	19.7121	-71.6934	S32684127	CWC Area Search
Snowy Plover	Charadrius nivosus	17	2012-11-24	Fall	Cuba	Pinar del Rio	L2745787	22.3292	-83.2741	S17679195	CWC Area Search
Snowy Plover	Charadrius nivosus	17	2018-10-15	Fall	Caribbean Netherlands	Bonaire	L835715	12.2759	-68.3565	S49947627	Stationary
Snowy Plover	Charadrius nivosus	16	2012-08-25	Fall	Puerto Rico	Cabo Rojo	L343336	17.9566	-67.1993	S11440103	Traveling
Snowy Plover	Charadrius nivosus	16	2015-09-02	Fall	Caribbean Netherlands	Bonaire	L2347050	12.1796	-68.2889	S24864289	Traveling
Snowy Plover	Charadrius nivosus	16	2018-08-05	Fall	Puerto Rico	Cabo Rojo	L1252908	17.9565	-67.1996	S47718221	Traveling
Snowy Plover	Charadrius nivosus	14	2014-11-10	Fall	Turks and Caicos Islands	Turks and Caicos Islands	L3157129	21.5203	-71.4966	S20504852	Traveling
Snowy Plover	Charadrius nivosus	14	2017-11-17	Fall	Bahamas	Inagua	L6480946	21.0075	-73.6411	S40559095	Traveling
Snowy Plover	Charadrius nivosus	12	2013-09-08	Fall	Dominican Republic	Peravia	L352478	18.2096	-70.537	S15163146	Traveling
Snowy Plover	Charadrius nivosus	12	2015-08-22	Fall	Caribbean Netherlands	Bonaire	L1119164	12.2342	-68.3718	S24718801	Traveling
Snowy Plover	Charadrius nivosus	11	2011-08-11	Fall	Puerto Rico	Cabo Rojo	L3081399	17.9635	-67.1649	S30926452	Traveling
Snowy Plover	Charadrius nivosus	11	2012-09-01	Fall	Puerto Rico	Hatillo	L1675093	18.4871	-66.8367	S11491671	Traveling
Snowy Plover	Charadrius nivosus	11	2016-09-04	Fall	Dominican Republic	Peravia	L352478	18.2096	-70.537	S31455578	Traveling
Snowy Plover	Charadrius nivosus	11	2016-10-22	Fall	Caribbean Netherlands	Bonaire	L1119183	12.0703	-68.2792	S32164897	Traveling
Snowy Plover	Charadrius nivosus	10	2012-09-24	Fall	Puerto Rico	Cabo Rojo	L293471	17.952	-67.1959	S11663577	Incidental
Snowy Plover	Charadrius nivosus	10	2015-08-18	Fall	Caribbean Netherlands	Bonaire	L1119183	12.0703	-68.2792	S24673161	Traveling
Snowy Plover	Charadrius nivosus	10	2015-09-05	Fall	Caribbean Netherlands	Bonaire	L3887940	12.18	-68.289	S24898278	Traveling
Snowy Plover	Charadrius nivosus	10	2018-09-03	Fall	Caribbean Netherlands	Bonaire	L2633397	12.2207	-68.3755	S48279493	Traveling
Snowy Plover	Charadrius nivosus	20	2019-03-23	Spring	Puerto Rico	Ponce	L7374401	17.9692	-66.6669	S62592196	Traveling
Snowy Plover	Charadrius nivosus	19	2016-03-27	Spring	Caribbean Netherlands	Bonaire	L4429246	12.09	-68.2342	S28584113	Stationary
Snowy Plover	Charadrius nivosus	17	2012-03-22	Spring	Cuba	Pinar del Rio	L2745787	22.3292	-83.2741	S17678591	CWC Area Search
Snowy Plover	Charadrius nivosus	15	2012-03-13	Spring	Dominican Republic	Monte Cristi	L1073998	19.7757	-71.6995	S11660794	CWC Area Search
Snowy Plover	Charadrius nivosus	15	2019-04-28	Spring	Puerto Rico	Cabo Rojo	L9213209	17.9491	-67.1931	S55941343	Traveling
Snowy Plover	Charadrius nivosus	14	2013-03-15	Spring	Cuba	Pinar del Rio	L2745787	22.3292	-83.2741	S17680462	CWC Area Search
Snowy Plover	Charadrius nivosus	14	2016-05-14	Spring	Caribbean Netherlands	Bonaire	L4614355	12.0768	-68.2621	S29747603	Traveling
Snowy Plover	Charadrius nivosus	14	2019-05-04	Spring	Puerto Rico	Cabo Rojo	L343336	17.9566	-67.1993	S55773764	CWC Traveling Count
Snowy Plover	Charadrius nivosus	12	2010-04-14	Spring	Caribbean Netherlands	Bonaire	L835715	12.2759	-68.3565	S6360166	Area
Snowy Plover	Charadrius nivosus	12	2012-03-28	Spring	Puerto Rico	Lajas	L1479271	17.9564	-67.0903	S10347774	Traveling
Snowy Plover	Charadrius nivosus	12	2015-05-29	Spring	Caribbean Netherlands	Bonaire	L3694266	12.058	-68.2512	S23763613	Traveling
Snowy Plover	Charadrius nivosus	12	2019-05-24	Spring	Bahamas	San Salvador and Rum Cay	L9334737	24.0996	-74.4414	S56696127	Traveling
Snowy Plover	Charadrius nivosus	11	2014-03-31	Spring	Puerto Rico	Cabo Rojo	L323798	17.9337	-67.1922	S17736490	Incidental
Snowy Plover	Charadrius nivosus	11	2014-03-31	Spring	Puerto Rico	Cabo Rojo	L1767230	17.9684	-67.1757	S17715401	Incidental
Snowy Plover	Charadrius nivosus	10	2010-05-08	Spring	Puerto Rico	Cabo Rojo	L902339	17.9561	-67.2114	S6390374	Stationary
Snowy Plover	Charadrius nivosus	10	2019-04-01	Spring	Puerto Rico	Cabo Rojo	L343336	17.9566	-67.1993	S54447628	CWC Traveling Count
Snowy Plover	Charadrius nivosus	22	2013-06-03	Summer	Puerto Rico	Cabo Rojo	L343336	17.9566	-67.1993	S14502340	Traveling
Snowy Plover	Charadrius nivosus	22	2016-07-29	Summer	Caribbean Netherlands	Bonaire	L835733	12.2397	-68.3772	S31211730	Stationary
Snowy Plover	Charadrius nivosus	20	2015-07-30	Summer	Puerto Rico	Cabo Rojo	L3831205	17.9676	-67.1787	S24503840	Stationary
Snowy Plover	Charadrius nivosus	19	2016-07-21	Summer	Puerto Rico	Cabo Rojo	L4840671	17.967	-67.1787	S30994110	Traveling
Snowy Plover	Charadrius nivosus	15	2012-06-24	Summer	Puerto Rico	Cabo Rojo	L730807	17.948	-67.1927	S11063652	Stationary
Snowy Plover	Charadrius nivosus	15	2015-06-13	Summer	Bahamas	Inagua	L3721307	20.9499	-73.5817	S23907649	Traveling
Snowy Plover	Charadrius nivosus	15	2015-07-01	Summer	Puerto Rico	Cabo Rojo	L343336	17.9566	-67.1993	S25492074	Traveling
Snowy Plover	Charadrius nivosus	13	2015-07-16	Summer	Bahamas	Inagua	L3162409	21.0011	-73.6011	S24292294	Traveling
Snowy Plover	Charadrius nivosus	12	2015-07-01	Summer	Puerto Rico	Cabo Rojo	L293471	17.952	-67.1959	S24118938	Stationary
Snowy Plover	Charadrius nivosus	12	2015-07-11	Summer	Puerto Rico	Cabo Rojo	L3785155	17.9677	-67.1792	S24231853	Stationary
Snowy Plover	Charadrius nivosus	12	2018-06-06	Summer	Anguilla	Anguilla	L7078343	18.1711	-63.1319	S46370528	Stationary
Snowy Plover	Charadrius nivosus	11	2015-06-09	Summer	Bahamas	Inagua	L3162409	21.0011	-73.6011	S24010386	Incidental
Snowy Plover	Charadrius nivosus	11	2016-07-02	Summer	Puerto Rico	Cabo Rojo	L343336	17.9566	-67.1993	S30978141	Traveling
Snowy Plover	Charadrius nivosus	10	2010-07-01	Summer	Caribbean Netherlands	Bonaire	L835733	12.2397	-68.3772	S6621513	Area
Snowy Plover	Charadrius nivosus	10	2015-06-29	Summer	Puerto Rico	Cabo Rojo	L343336	17.9566	-67.1993	S24122061	Traveling
Snowy Plover	Charadrius nivosus	10	2015-06-29	Summer	Puerto Rico	Cabo Rojo	L1767230	17.9684	-67.1757	S24094655	Traveling
Snowy Plover	Charadrius nivosus	10	2015-07-18	Summer	Puerto Rico	Cabo Rojo	L358880	17.9796	-67.1684	S24338952	Traveling
Snowy Plover	Charadrius nivosus	33	2012-12-30	Winter	Puerto Rico	Cabo Rojo	L1243442	17.9631	-67.1863	S12474077	Stationary
Snowy Plover	Charadrius nivosus	33	2014-01-30	Winter	Cuba	Pinar del Rio	L2745787	22.3292	-83.2741	S17683301	CWC Area Search
Snowy Plover	Charadrius nivosus	27	2011-01-31	Winter	Puerto Rico	Cabo Rojo	L1086550	17.9613	-67.1959	S7569641	Incidental
Snowy Plover	Charadrius nivosus	21	2015-12-16	Winter	Cuba	Matanzas	L5783732	23.0637	-80.7789	S40939533	CWC Point Count
Snowy Plover	Charadrius nivosus	20	2014-12-27	Winter	Puerto Rico	Cabo Rojo	L1252908	17.9565	-67.1996	S21059175	Traveling
Snowy Plover	Charadrius nivosus	17	2013-12-02	Winter	Puerto Rico	Cabo Rojo	L343336	17.9566	-67.1993	S15840449	Stationary
Snowy Plover	Charadrius nivosus	17	2018-01-07	Winter	Puerto Rico	Cabo Rojo	L1252908	17.9565	-67.1996	S43353381	Traveling
Snowy Plover	Charadrius nivosus	14	2016-02-09	Winter	Caribbean Netherlands	Bonaire	L3288877	12.0292	-68.2447	S27403124	Traveling
Snowy Plover	Charadrius nivosus	13	2013-01-14	Winter	Caribbean Netherlands	Bonaire	L835715	12.2759	-68.3565	S12642015	CWC Point Count
Snowy Plover	Charadrius nivosus	13	2016-02-08	Winter	Caribbean Netherlands	Bonaire	L3288877	12.0292	-68.2447	S27391780	Traveling
Snowy Plover	Charadrius nivosus	13	2019-02-09	Winter	Puerto Rico	Cabo Rojo	L343336	17.9566	-67.1993	S52536534	Traveling
Snowy Plover	Charadrius nivosus	12	2018-02-07	Winter	Puerto Rico	Cabo Rojo	L1252908	17.9565	-67.1996	S42568224	Traveling
Snowy Plover	Charadrius nivosus	10	2015-12-02	Winter	Puerto Rico	Cabo Rojo	L343336	17.9566	-67.1993	S26636903	Traveling
Snowy Plover	Charadrius nivosus	10	2018-02-16	Winter	Puerto Rico	Arecibo	L6928629	18.4868	-66.6623	S42851369	Traveling

## Sheet: >385 Black-necked Stilt Data
COMMON NAME	SCIENTIFIC NAME	COUNT	DATE	SEASON	COUNTRY	STATE	LOCALITY ID	LATITUDE	LONGITUDE	SAMPLING EVENT IDENTIFIER	PROTOCOL TYPE
Black-necked Stilt	Himantopus mexicanus	2700	2013-11-20	Fall	Dominican Republic	Monte Cristi	L2456088	19.7129	-71.7026	S15880199	CWC Area Search
Black-necked Stilt	Himantopus mexicanus	2332	2013-11-20	Fall	Dominican Republic	Monte Cristi	L2456128	19.7121	-71.6934	S15880497	CWC Area Search
Black-necked Stilt	Himantopus mexicanus	2000	2012-08-25	Fall	Puerto Rico	Cabo Rojo	L343336	17.9566	-67.1993	S11440103	Traveling
Black-necked Stilt	Himantopus mexicanus	1500	2015-10-02	Fall	Dominican Republic	Monte Cristi	L2456088	19.7129	-71.7026	S27249849	Traveling
Black-necked Stilt	Himantopus mexicanus	1000	2014-11-29	Fall	Puerto Rico	Cabo Rojo	L1090093	17.9757	-67.2116	S21215786	Traveling
Black-necked Stilt	Himantopus mexicanus	1000	2018-08-05	Fall	Puerto Rico	Cabo Rojo	L343336	17.9566	-67.1993	S47733249	Traveling
Black-necked Stilt	Himantopus mexicanus	767	2018-08-05	Fall	Puerto Rico	Cabo Rojo	L1252908	17.9565	-67.1996	S47675202	Traveling
Black-necked Stilt	Himantopus mexicanus	756	2013-10-18	Fall	Puerto Rico	Cabo Rojo	L293471	17.952	-67.1959	S15434721	Traveling
Black-necked Stilt	Himantopus mexicanus	740	2012-11-24	Fall	Cuba	Pinar del Rio	L2745787	22.3292	-83.2741	S17679195	CWC Area Search
Black-necked Stilt	Himantopus mexicanus	661	2012-11-08	Fall	Puerto Rico	Lajas	L1525747	17.9759	-67.0125	S11994226	Traveling
Black-necked Stilt	Himantopus mexicanus	600	2016-11-28	Fall	Puerto Rico	Cabo Rojo	L682443	17.9743	-67.2111	S32768025	Stationary
Black-necked Stilt	Himantopus mexicanus	531	2019-09-07	Fall	Jamaica	Saint Catherine	L3080268	17.9125	-77.0903	S59842371	CWC Point Count
Black-necked Stilt	Himantopus mexicanus	500	2019-11-01	Fall	Puerto Rico	Cabo Rojo	L3073913	17.9682	-67.183	S61091541	Traveling
Black-necked Stilt	Himantopus mexicanus	500	2019-11-14	Fall	Cuba	Ciego de Avila	L10152416	22.4511	-78.3749	S61479100	Stationary
Black-necked Stilt	Himantopus mexicanus	500	2019-11-15	Fall	Cuba	Ciego de Avila	L3455848	22.4148	-78.417	S61538810	Traveling
Black-necked Stilt	Himantopus mexicanus	496	2013-11-24	Fall	Cuba	Pinar del Rio	L2745787	22.3292	-83.2741	S17682692	CWC Area Search
Black-necked Stilt	Himantopus mexicanus	400	2018-11-22	Fall	Cuba	Ciego de Avila	L3455848	22.4148	-78.417	S50398875	Traveling
Black-necked Stilt	Himantopus mexicanus	400	2019-10-20	Fall	Jamaica	Saint Catherine	L673843	17.9102	-77.0893	S60791052	Traveling
Black-necked Stilt	Himantopus mexicanus	400	2019-10-27	Fall	Cuba	Ciego de Avila	L10112662	22.464	-78.3716	S61168222	Stationary
Black-necked Stilt	Himantopus mexicanus	575	2019-03-09	Spring	Cuba	Ciego de Avila	L8821585	22.4322	-78.3809	S54028582	Stationary
Black-necked Stilt	Himantopus mexicanus	500	2019-03-08	Spring	Cuba	Ciego de Avila	L8888887	22.441	-78.3782	S54062756	Stationary
Black-necked Stilt	Himantopus mexicanus	473	2012-03-22	Spring	Cuba	Pinar del Rio	L2745787	22.3292	-83.2741	S17678591	CWC Area Search
Black-necked Stilt	Himantopus mexicanus	460	2018-03-04	Spring	Puerto Rico	Cabo Rojo	L3073998	17.975	-67.2123	S43375246	Traveling
Black-necked Stilt	Himantopus mexicanus	450	2013-03-19	Spring	Dominican Republic	Monte Cristi	L1804713	19.7691	-71.7404	S13689334	CWC Area Search
Black-necked Stilt	Himantopus mexicanus	450	2019-03-08	Spring	Cuba	Ciego de Avila	L8858480	22.4326	-78.3808	S53865270	Stationary
Black-necked Stilt	Himantopus mexicanus	430	2013-03-18	Spring	Cuba	Matanzas	L2746996	22.19	-81.02	S17765827	CWC Area Search
Black-necked Stilt	Himantopus mexicanus	400	2017-03-23	Spring	Puerto Rico	Cabo Rojo	L358880	17.9796	-67.1684	S35380694	Traveling
Black-necked Stilt	Himantopus mexicanus	400	2019-03-19	Spring	Cuba	Ciego de Avila	L606193	22.5636	-78.6401	S54300530	Traveling
Black-necked Stilt	Himantopus mexicanus	595	2018-07-04	Summer	Puerto Rico	Cabo Rojo	L1268031	17.9614	-67.2099	S46994081	Traveling
Black-necked Stilt	Himantopus mexicanus	449	2016-07-02	Summer	Puerto Rico	Cabo Rojo	L343336	17.9566	-67.1993	S30978141	Traveling
Black-necked Stilt	Himantopus mexicanus	3500	2018-01-30	Winter	Cuba	Ciego de Avila	L3455848	22.4148	-78.417	S42712154	Traveling
Black-necked Stilt	Himantopus mexicanus	2425	2016-12-17	Winter	Puerto Rico	Cabo Rojo	L1252908	17.9565	-67.1996	S33094253	Traveling
Black-necked Stilt	Himantopus mexicanus	2000	2011-12-11	Winter	Puerto Rico	Santa Isabel	L360553	17.9584	-66.3634	S9343410	Traveling
Black-necked Stilt	Himantopus mexicanus	1700	2015-02-25	Winter	Dominican Republic	Monte Cristi	L2456088	19.7129	-71.7026	S22803623	CWC Area Search
Black-necked Stilt	Himantopus mexicanus	1500	2013-12-30	Winter	Puerto Rico	Cabo Rojo	L682443	17.9743	-67.2111	S16333395	Stationary
Black-necked Stilt	Himantopus mexicanus	1257	2013-12-28	Winter	Puerto Rico	Cabo Rojo	L1252908	17.9565	-67.1996	S16113784	Traveling
Black-necked Stilt	Himantopus mexicanus	1000	2017-12-16	Winter	Cuba	Ciego de Avila	L2489391	22.5113	-78.3984	S41205921	Traveling
Black-necked Stilt	Himantopus mexicanus	1000	2019-01-17	Winter	Cuba	Ciego de Avila	L8460547	22.2989	-78.5232	S51849613	Traveling
Black-necked Stilt	Himantopus mexicanus	813	2014-12-27	Winter	Puerto Rico	Cabo Rojo	L1252908	17.9565	-67.1996	S21059175	Traveling
Black-necked Stilt	Himantopus mexicanus	800	2019-02-28	Winter	Cuba	Ciego de Avila	L8218422	22.4374	-78.3793	S53264651	Stationary
Black-necked Stilt	Himantopus mexicanus	737	2017-02-13	Winter	Dominican Republic	Monte Cristi	L2455935	19.7103	-71.6836	S35389253	CWC Area Search
Black-necked Stilt	Himantopus mexicanus	700	2014-01-30	Winter	Dominican Republic	Monte Cristi	L2456088	19.7129	-71.7026	S16791652	CWC Area Search
Black-necked Stilt	Himantopus mexicanus	700	2019-01-26	Winter	Cuba	Ciego de Avila	L2246787	22.4639	-78.162	S52086104	Traveling
Black-necked Stilt	Himantopus mexicanus	650	2018-01-31	Winter	Cuba	Ciego de Avila	L6830686	22.4314	-78.3827	S42549377	Traveling
Black-necked Stilt	Himantopus mexicanus	610	2017-12-08	Winter	Cuba	Ciego de Avila	L3455848	22.4148	-78.417	S41044120	Traveling
Black-necked Stilt	Himantopus mexicanus	600	2018-12-01	Winter	Haiti	Nord-Est	L8210691	19.6655	-71.761	S50433006	Stationary
Black-necked Stilt	Himantopus mexicanus	600	2019-02-14	Winter	Cuba	Sancti Spiritus	L5385573	21.676	-79.5303	S52807793	Stationary
Black-necked Stilt	Himantopus mexicanus	500	2012-12-10	Winter	Puerto Rico	Cabo Rojo	L1044578	17.9494	-67.1938	S12265866	Traveling
Black-necked Stilt	Himantopus mexicanus	500	2017-01-26	Winter	Cuba	Sancti Spiritus	L5385573	21.676	-79.5303	S34176966	Traveling
Black-necked Stilt	Himantopus mexicanus	500	2018-02-02	Winter	Puerto Rico	Cabo Rojo	L682443	17.9743	-67.2111	S42434766	Stationary
Black-necked Stilt	Himantopus mexicanus	500	2019-01-04	Winter	Cuba	Ciego de Avila	L2246786	22.4305	-78.2714	S51320962	Traveling
Black-necked Stilt	Himantopus mexicanus	500	2019-02-15	Winter	Cuba	Ciego de Avila	L8620012	22.44	-78.3783	S54272696	Stationary
Black-necked Stilt	Himantopus mexicanus	485	2014-02-18	Winter	Cuba	Matanzas	L2746996	22.19	-81.02	S17801120	CWC Area Search
Black-necked Stilt	Himantopus mexicanus	470	2019-02-15	Winter	Puerto Rico	Lajas	L323820	17.9734	-67.0041	S55571916	Traveling
Black-necked Stilt	Himantopus mexicanus	460	2019-02-15	Winter	Puerto Rico	Lajas	L323820	17.9734	-67.0041	S54286978	Traveling
Black-necked Stilt	Himantopus mexicanus	460	2019-02-15	Winter	Puerto Rico	Lajas	L323820	17.9734	-67.0041	S52892730	Traveling
Black-necked Stilt	Himantopus mexicanus	450	2013-02-10	Winter	Cuba	Ciego de Avila	L3818647	22.5966	-78.6659	S13138538	Traveling
Black-necked Stilt	Himantopus mexicanus	450	2019-01-14	Winter	Cuba	Ciego de Avila	L8437219	22.4222	-78.3944	S51720582	Stationary
Black-necked Stilt	Himantopus mexicanus	425	2015-02-20	Winter	Cuba	Villa Clara	L3404409	22.6583	-79.0208	S22006330	Traveling
Black-necked Stilt	Himantopus mexicanus	410	2016-12-06	Winter	Puerto Rico	Cabo Rojo	L3073998	17.975	-67.2123	S32912417	Traveling
Black-necked Stilt	Himantopus mexicanus	406	2014-02-20	Winter	Cuba	Matanzas	L2746996	22.19	-81.02	S17801333	CWC Area Search
Black-necked Stilt	Himantopus mexicanus	400	2015-01-01	Winter	Puerto Rico	Cabo Rojo	L2526721	17.9669	-67.1721	S21750541	CWC Point Count
Black-necked Stilt	Himantopus mexicanus	400	2017-01-16	Winter	Cuba	Sancti Spiritus	L5297392	21.6757	-79.5297	S35558431	Traveling
Black-necked Stilt	Himantopus mexicanus	400	2019-02-15	Winter	Cuba	Ciego de Avila	L8620254	22.4368	-78.3794	S52747477	Traveling
Black-necked Stilt	Himantopus mexicanus	400	2019-02-28	Winter	Cuba	Ciego de Avila	L8753291	22.427	-78.3838	S53841581	Stationary
Black-necked Stilt	Himantopus mexicanus	387	2019-02-15	Winter	Puerto Rico	Lajas	L323820	17.9734	-67.0041	S55576404	Traveling
