# Supplementary material for: Identification of priority shorebird conservation areas in the Caribbean
Source: PeerJ journal article supplement (doi:10.7717/peerj.9831), 2020-09-08

# Number of Checklistists

18,000  
10,000  
2,000

Puerto Rico  
Cuba  
The Bahamas  
Trinidad & Tobago  
Cayman Islands  
Aruba  
Guadeloupe  
Curaçao  
Barbados  
U.S. Virgin Islands  
Jamaica  
Dominican Republic  
St. Martin/Sint Maarten  
Turks and Caicos Islands  
Haiti  
Grenada  
Anguilla  
British Virgin Islands  
Antigua & Barbuda  
St. Vincent & the Grenadines  
Montserrat  
Saint Kitts & Nevis  
St. Lucia  
Martinique  
Dominica  
Sint Eustatius  
St. Barthélemy  
Saba

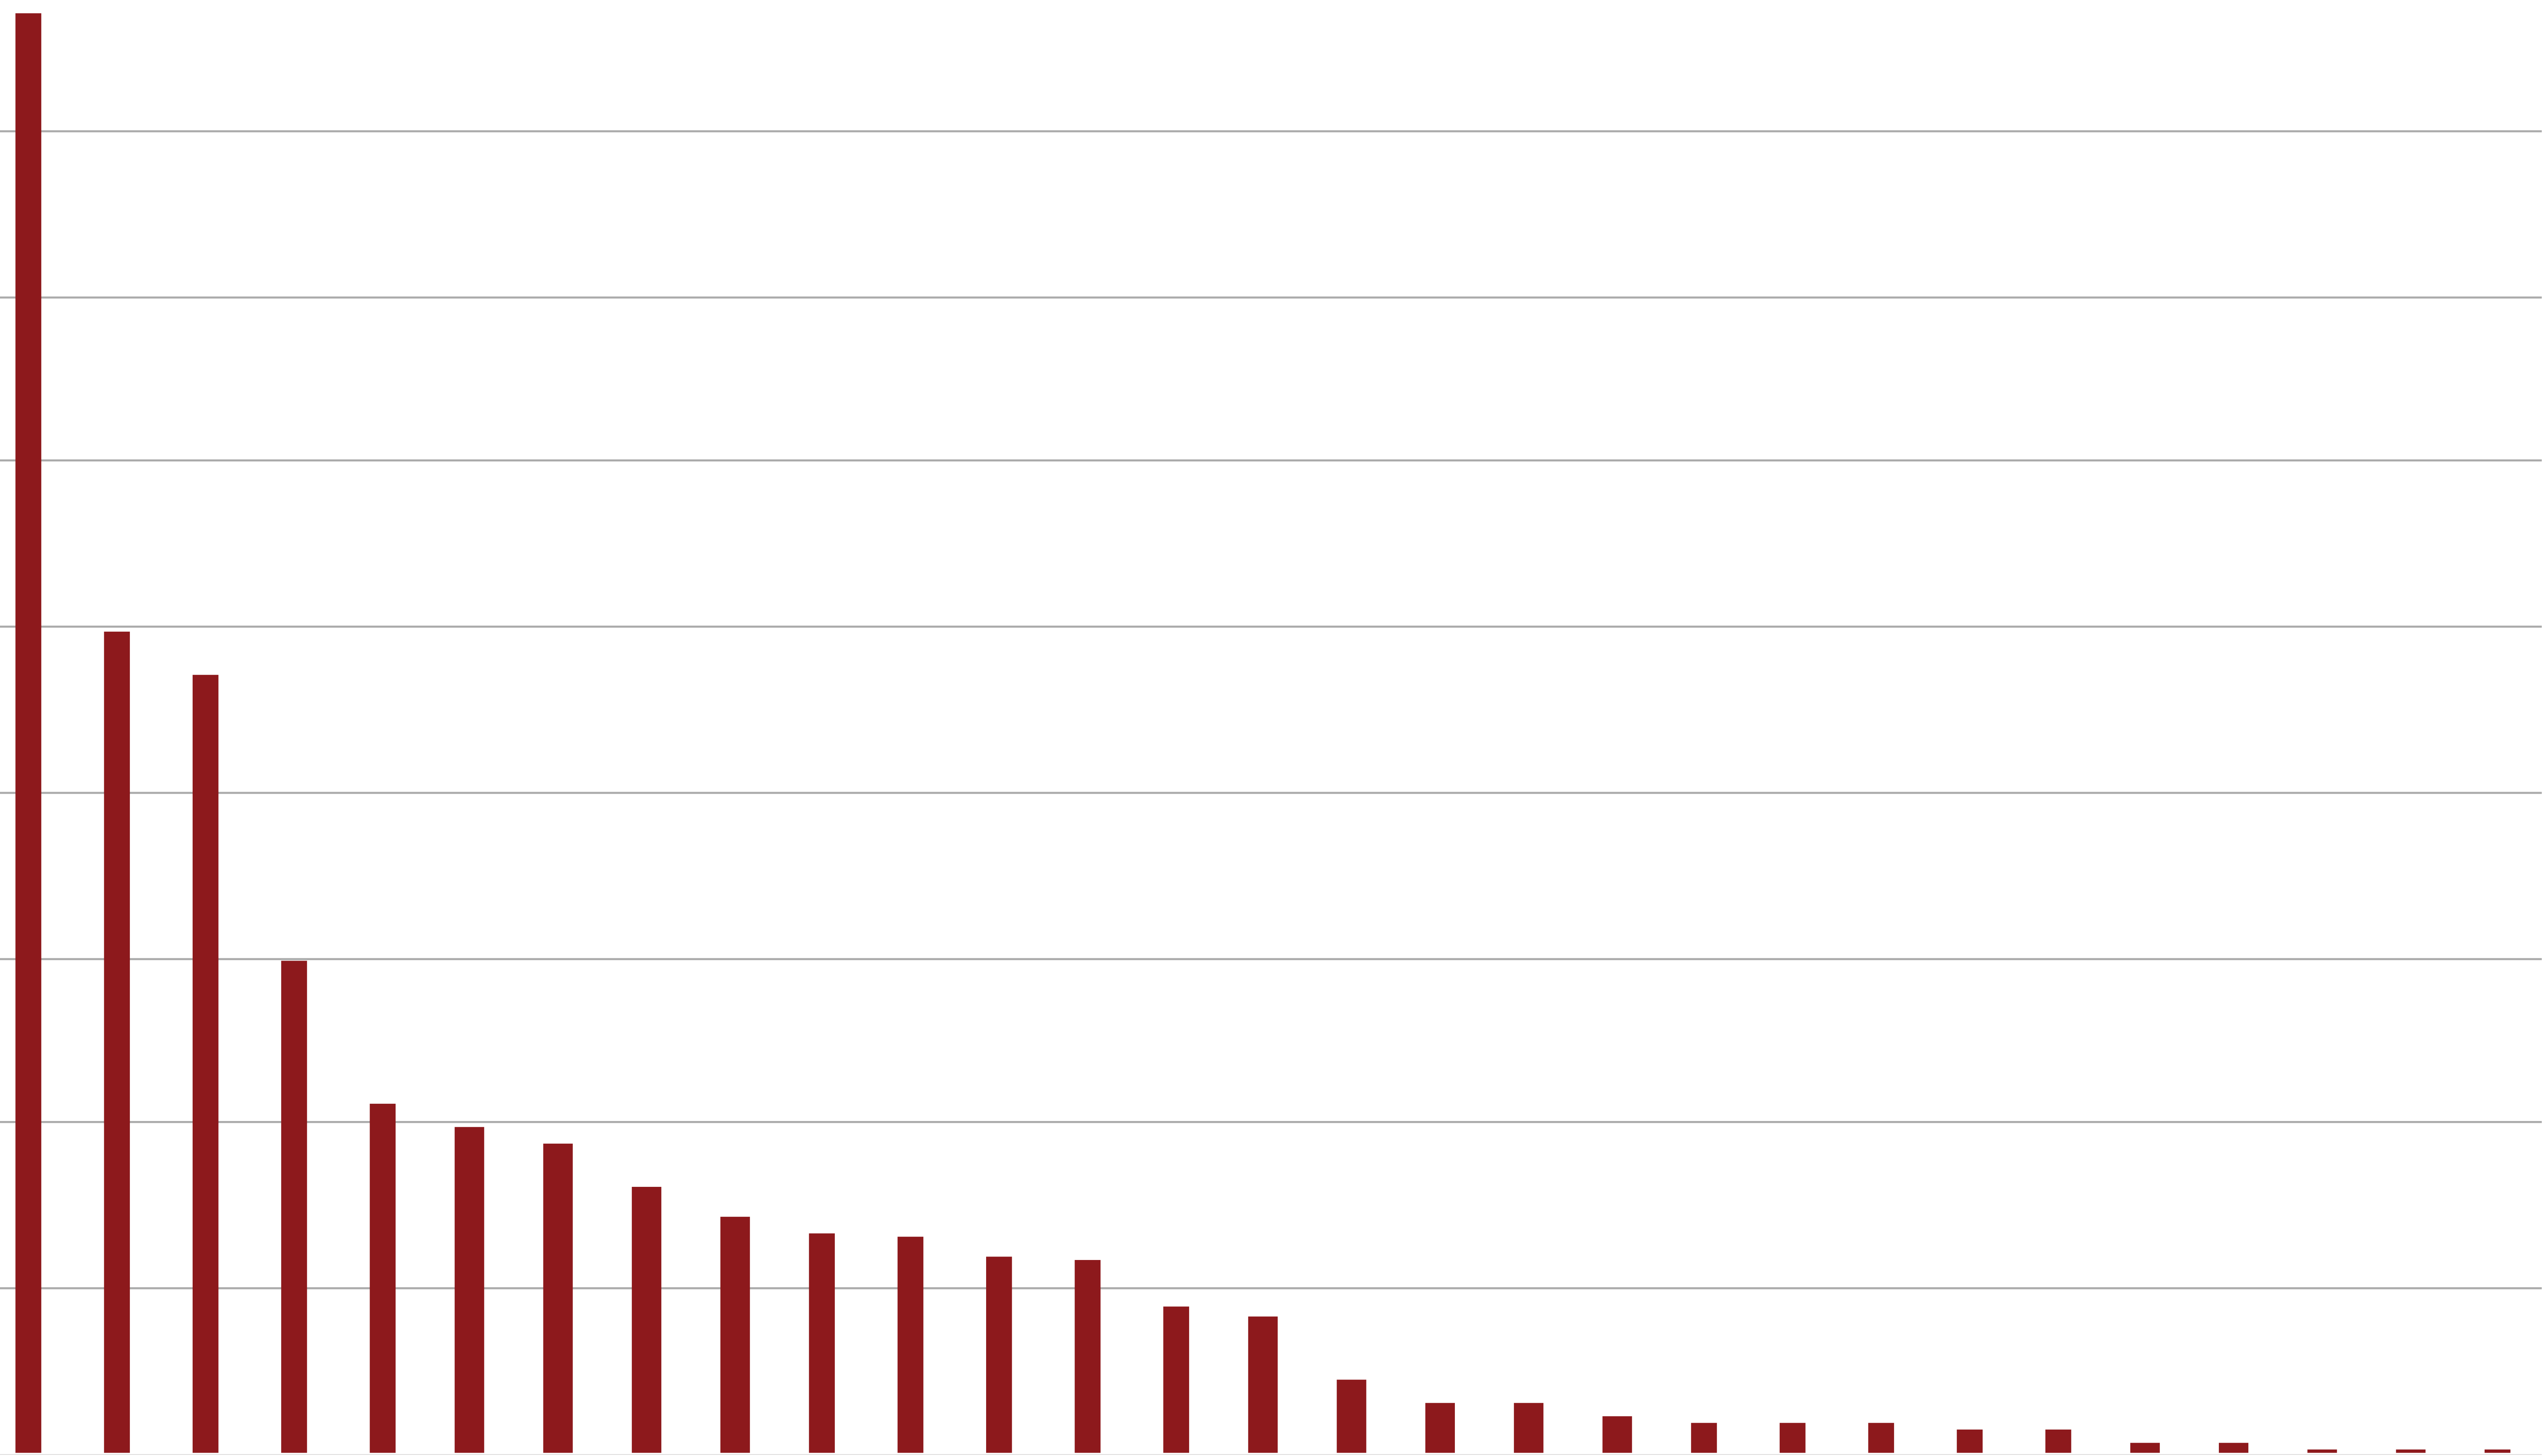

Supplement: Supplemental_Figure_S2.pdf [file Supplemental_Figure_S2.pdf]
