# Supplementary material for: Identification of priority shorebird conservation areas in the Caribbean
Source: PeerJ journal article supplement (doi:10.7717/peerj.9831), 2020-09-08

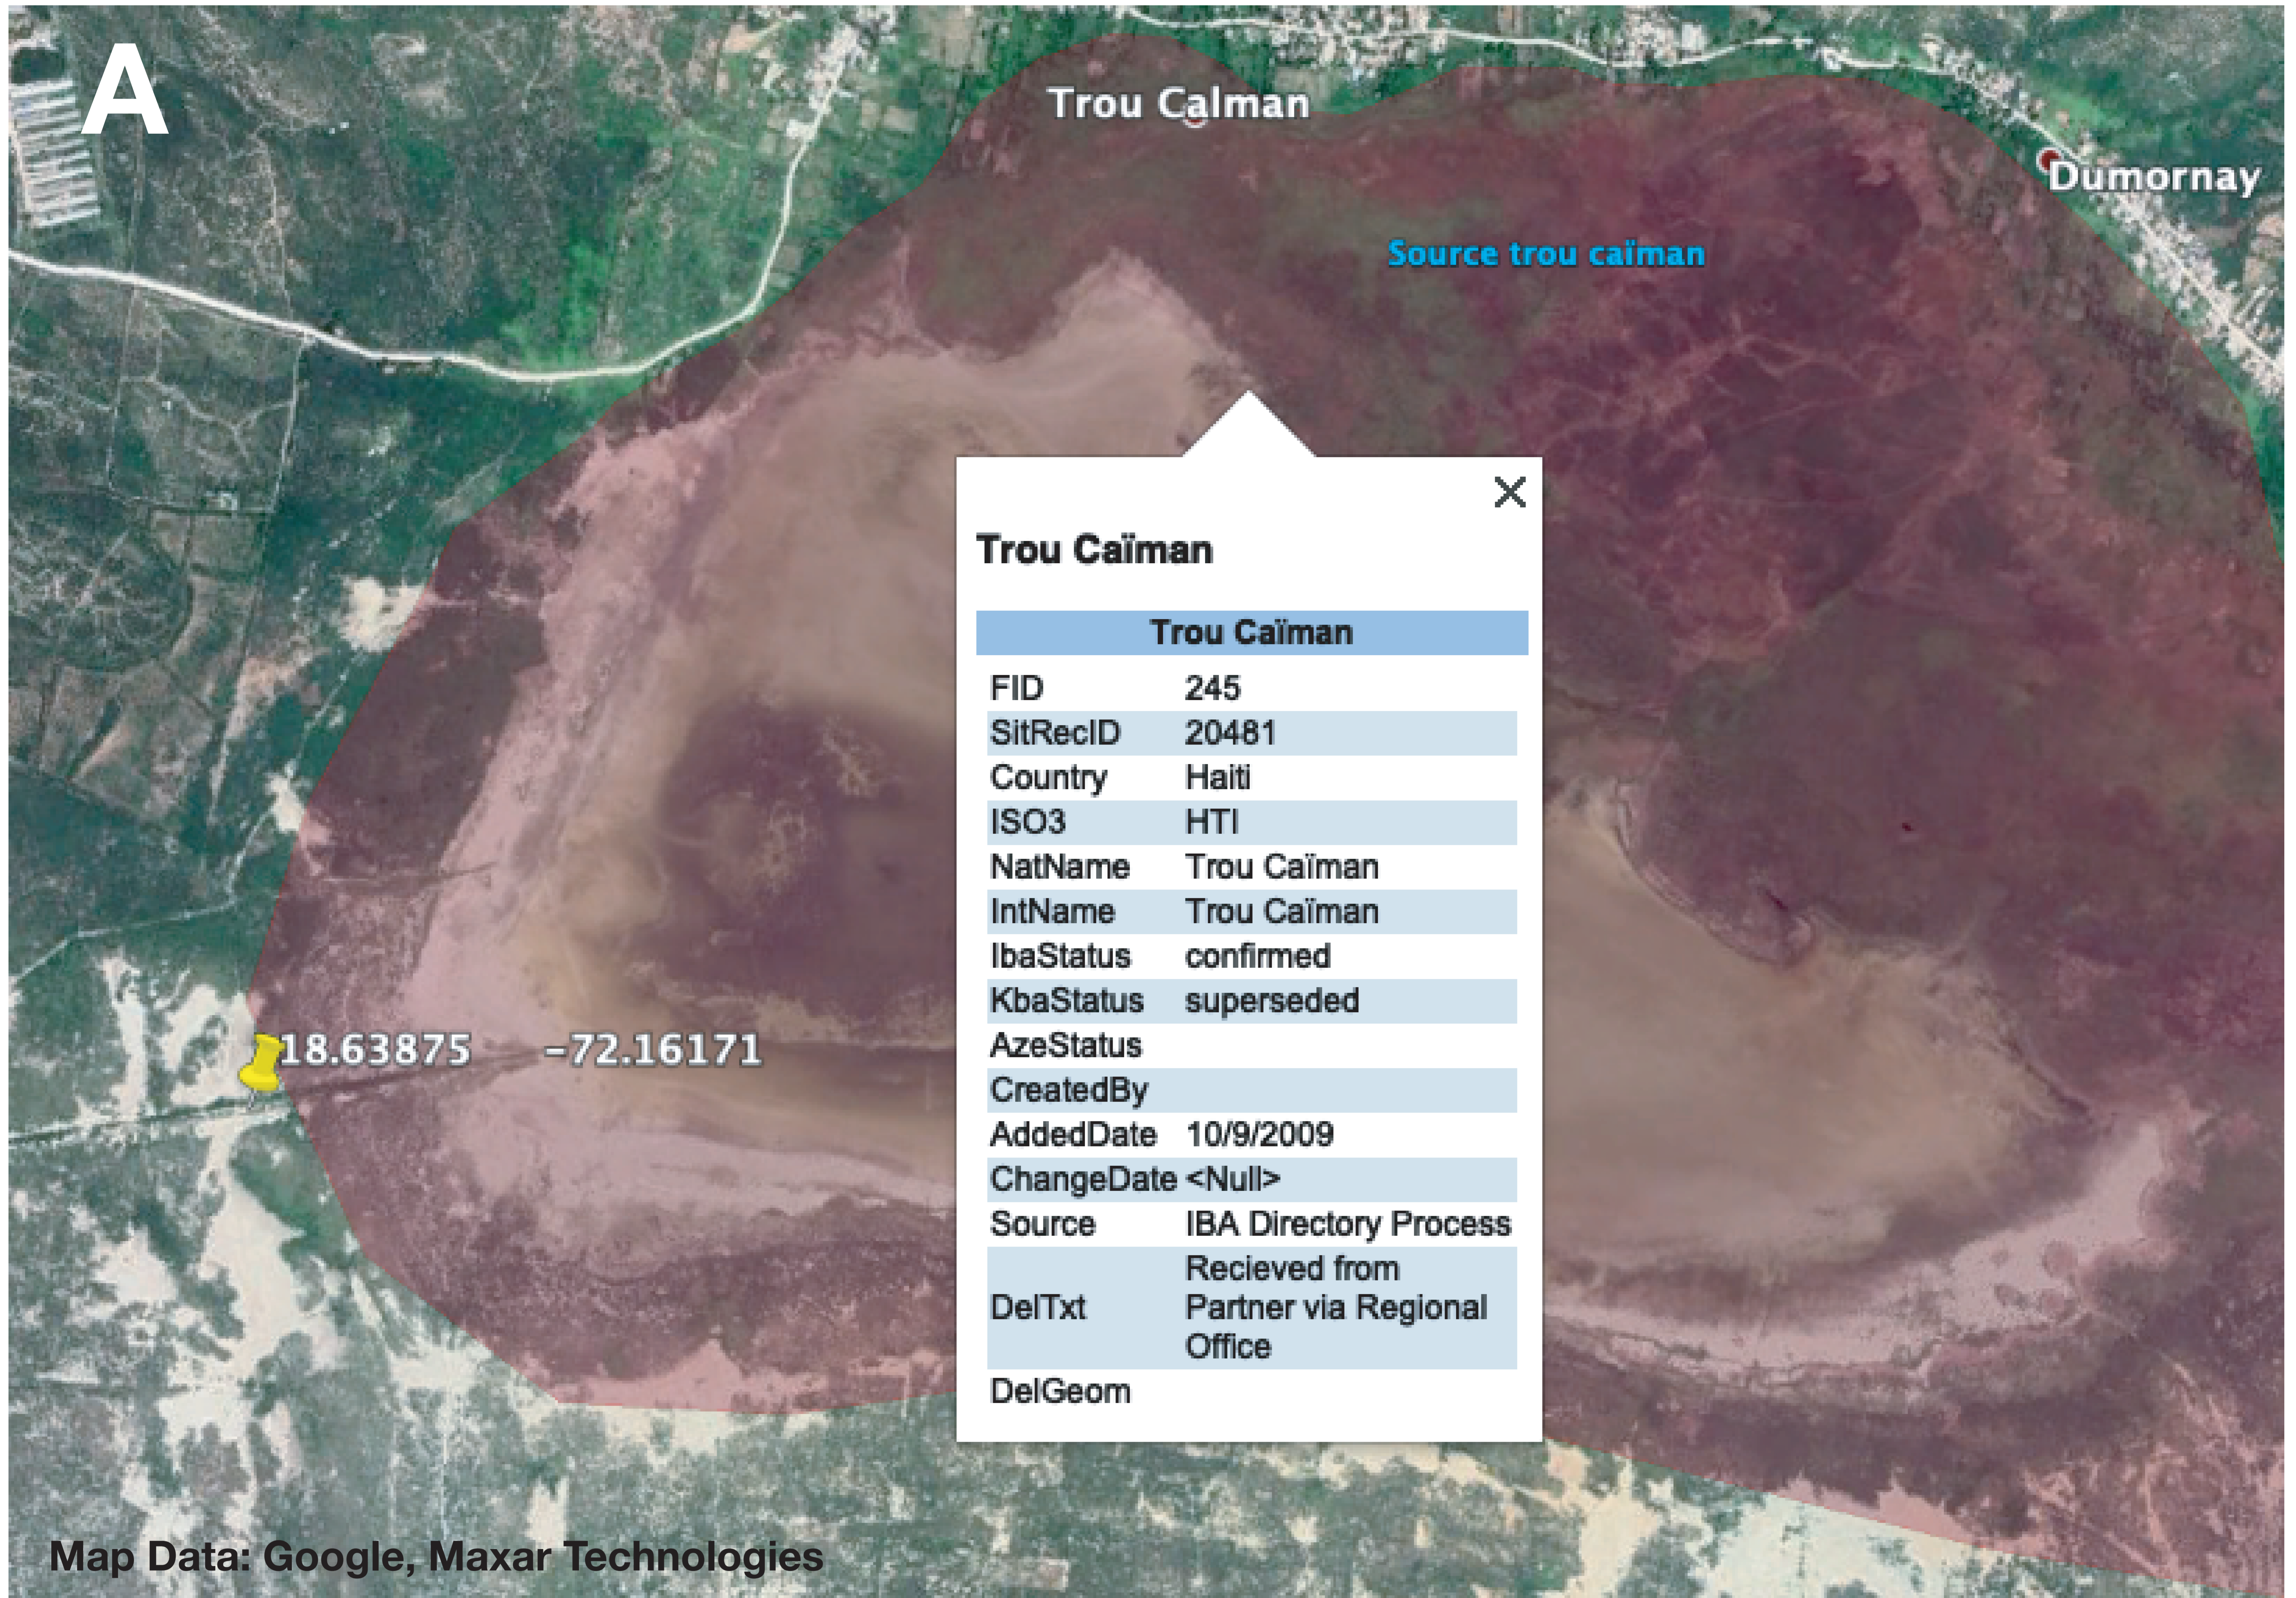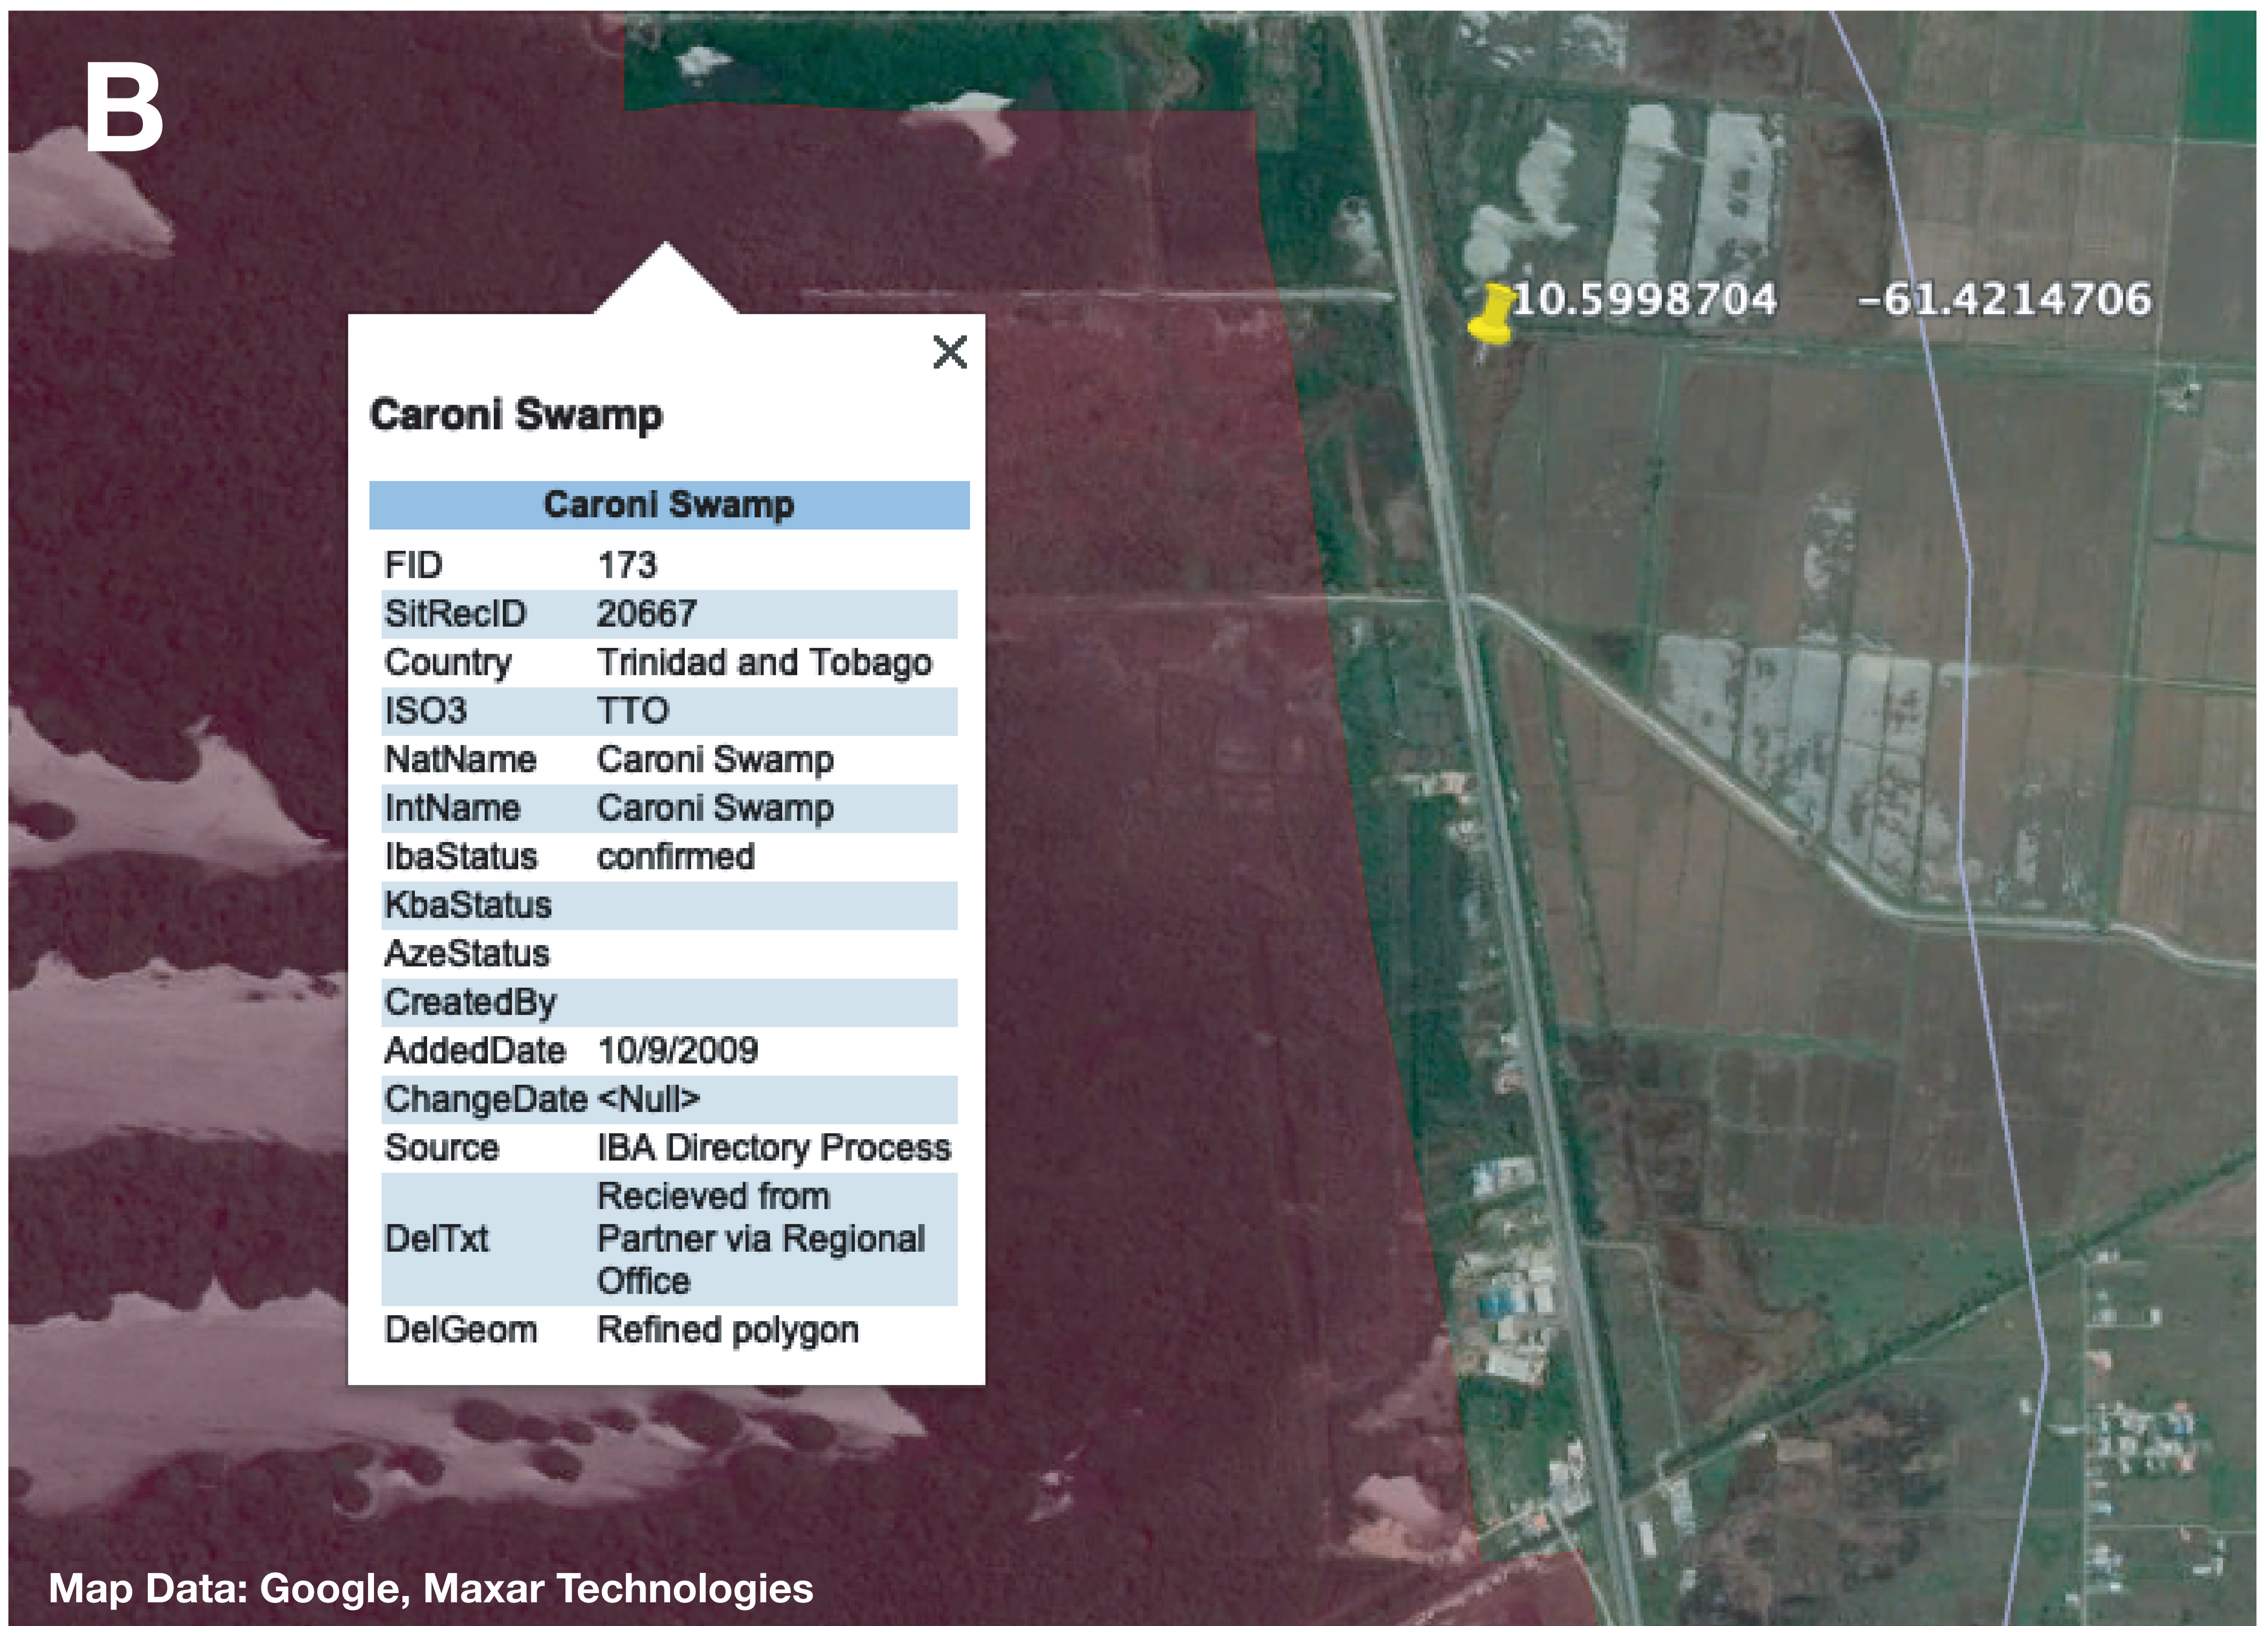

Supplement: Supplemental_Figure_S6.pdf [file Supplemental_Figure_S6.pdf]
