# Supplementary material for: Identification of priority shorebird conservation areas in the Caribbean
Source: PeerJ journal article supplement (doi:10.7717/peerj.9831), 2020-09-08
Supplement: Supplemental_Table_S1.pdf [file Supplemental_Table_S1.pdf]

**Table S1:****Caribbean IBAs that were triggered by shorebird species.**

Birdlife International established twenty-one IBAs that were triggered by shorebird species (datazone.birdlife.org). Our analysis identified seven of these IBAs that hosted shorebird records that exceeded population thresholds.

| Country/<br>Territory | Site name                                | IBA<br>code | IBA trigger species<br>(shorebirds only)                                                                                  | Species<br>estimate                               | Year of<br>estimate                  | Most<br>recent IBA<br>criteria<br>assessment | Species that<br>exceeded<br>thresholds from<br>our analysis |
|-----------------------|------------------------------------------|-------------|---------------------------------------------------------------------------------------------------------------------------|---------------------------------------------------|--------------------------------------|----------------------------------------------|-------------------------------------------------------------|
| The<br>Bahamas        | Driggs Hill to Mars Bay                  | BS012       | Piping Plover                                                                                                             | 38                                                | 2006                                 | 2013                                         |                                                             |
|                       | Grand Bahama Southern Shore              | BS003       | Piping Plover                                                                                                             | 70                                                | 2006                                 | 2007                                         |                                                             |
|                       | Joulter Cays                             | BS041       | Piping Plover                                                                                                             | 326                                               | 2012                                 | 2012                                         | Piping Plover                                               |
|                       | Kemp Cay to Pigeon Cay                   | BS042       | Piping Plover                                                                                                             | 255                                               | 2011                                 | 2012                                         | Piping Plover                                               |
|                       | South Beach Tidal Flats                  | BS015       | Piping Plover                                                                                                             | <50                                               | 2006                                 | 2007                                         |                                                             |
|                       | Stafford Creek to Andros Town            | BS009       | Piping Plover                                                                                                             | 85                                                | 2006                                 | 2013                                         |                                                             |
| Barbados              | St. Lucy Shooting Swamps                 | BB002       | American Golden-Plover<br>Pectoral Sandpiper<br>Greater Yellowlegs<br>Lesser Yellowlegs<br><i>Waterbirds Congregation</i> | 4,050-9,000<br>6,600<br>2,550<br>13,200<br>20,000 | 1991<br>1991<br>1991<br>1991<br>2007 | 2007                                         |                                                             |
|                       | St. Philip Shooting Swamps               | BB006       | American Golden-Plover<br>Pectoral Sandpiper<br>Greater Yellowlegs<br>Lesser Yellowlegs<br><i>Waterbirds Congregation</i> | 4,050-9,000<br>6,600<br>2,550<br>13,200<br>20,000 | 1991<br>1991<br>1991<br>1991<br>2007 | 2007                                         |                                                             |
| Cuba                  | Cayería Centro - Oriental de Villa Clara | CU008       | Piping Plover                                                                                                             | unreported                                        | 2004                                 | 2008                                         | Black-bellied Plover                                        |
|                       | Cayos Romano - Cruz - Megano Grande      | CU015       | Piping Plover                                                                                                             | 98                                                | 1996-2006                            | 2008                                         |                                                             |

**Table S1:****Caribbean IBAs that were triggered by shorebird species.**

Birdlife International established twenty-one IBAs that were triggered by shorebird species (datazone.birdlife.org). Our analysis identified seven of these IBAs that hosted shorebird records that exceeded population thresholds.

| Country/<br>Territory | Site name                                | IBA<br>code | IBA trigger species<br>(shorebirds only)                                                         | Species<br>estimate                                           | Year of<br>estimate          | Most<br>recent IBA<br>criteria<br>assessment | Species that<br>exceeded<br>thresholds from<br>our analysis         |
|-----------------------|------------------------------------------|-------------|--------------------------------------------------------------------------------------------------|---------------------------------------------------------------|------------------------------|----------------------------------------------|---------------------------------------------------------------------|
|                       | Delta del Cauto                          | CU020       | Least Sandpiper<br>Short-billed Dowitcher<br>Lesser Yellowlegs<br><i>Waterbirds Congregation</i> | 10,000<br>3,000<br>5,000<br><i>50,000-99,999</i>              | 2006<br>2006<br>2006<br>2006 | 2008                                         |                                                                     |
|                       | Gran Humedal del Norte de Ciego de Ávila | CU012       | Piping Plover                                                                                    | 32                                                            | 2006                         | 2008                                         | Black-necked Stilt                                                  |
|                       | Humedal Sur de Pinar del Río             | CU003       | Short-billed Dowitcher<br><i>Waterbirds Congregation</i>                                         | 10,000<br><i>50,000-99,999</i>                                | 2007<br>2007                 | 2008                                         | Short-billed Dowitcher;<br>Black-bellied Plover;<br>Wilson's Plover |
|                       | Humedal Sur de Sancti Spiritus           | CU009       | Least Sandpiper<br>Short-billed Dowitcher<br>Lesser Yellowlegs<br><i>Waterbirds Congregation</i> | 10,000<br>5,000<br>5,000<br><i>100,000-499,999</i>            | 2007<br>2007<br>2007<br>2007 | 2008                                         |                                                                     |
| Puerto Rico           | Jobos Bay                                | PR013       | Wilson's Plover                                                                                  | 93                                                            | 1985-1986                    | 2007                                         |                                                                     |
|                       | Suroeste (includes Cabo Rojo)            | PR008       | Wilson's Plover<br>Snowy Plover<br>Stilt Sandpiper                                               | 294<br>266<br>19,895                                          | 1991<br>2004<br>1991         | 2007                                         | Black-necked Stilt                                                  |
| Trinidad & Tobago     | West Coast Mudflats                      | TT001       | Semipalmated Plover<br>Whimbrel<br>Short-billed Dowitcher<br><i>Waterbirds Congregation</i>      | 1,000-2,000<br>500-1,000<br>750-1,250<br><i>20,000-49,999</i> | 2007<br>2007<br>2007<br>2007 | 2007                                         |                                                                     |
|                       | East Caicos and adjacent areas           | TC005       | Wilson's Plover                                                                                  | 2005                                                          | 30 br. pairs                 | 2007                                         | Piping Plover                                                       |

**Table S1:****Caribbean IBAs that were triggered by shorebird species.**

Birdlife International established twenty-one IBAs that were triggered by shorebird species (datazone.birdlife.org). Our analysis identified seven of these IBAs that hosted shorebird records that exceeded population thresholds.

| Country/<br>Territory          | Site name                                    | IBA<br>code | IBA trigger species<br>(shorebirds only)                                                                                                                          | Species<br>estimate                                               | Year of<br>estimate                                         | Most<br>recent IBA<br>criteria<br>assessment | Species that<br>exceeded<br>thresholds from<br>our analysis |
|--------------------------------|----------------------------------------------|-------------|-------------------------------------------------------------------------------------------------------------------------------------------------------------------|-------------------------------------------------------------------|-------------------------------------------------------------|----------------------------------------------|-------------------------------------------------------------|
| Turks and<br>Caicos<br>Islands | Grand Turk Salinas and Shores                | TC007       | Wilson's Plover<br>Short-billed Dowitcher<br>Lesser Yellowlegs<br>Greater Yellowlegs                                                                              | 30 br. pairs<br>4,000<br>6,000<br>1,000                           | 2005<br>2005<br>2005<br>2005                                | 2007                                         |                                                             |
|                                | North, Middle and East Caicos<br>Ramsar Site | TC003       | Black-bellied Plover<br>Wilson's Plover<br>Least Sandpiper<br>Short-billed Dowitcher<br>Lesser Yellowlegs<br>Greater Yellowlegs<br><i>Waterbirds Congregation</i> | 2,500<br>100<br>6,000<br>3,200<br>5,000<br>1,000<br><i>20,000</i> | 2005<br>2005<br>2005<br>2005<br>2005<br>2005<br><i>2005</i> | 2007                                         |                                                             |
|                                | Salt Cay Creek and Salinas                   | TC009       | Wilson's Plover                                                                                                                                                   | 30 br. pairs                                                      | 2005                                                        | 2007                                         |                                                             |
